# Supplementary material
Source: MDPI journal article supplement (https://www.mdpi.com/2072-4292/13/22/4607)
Supplement: s1 [file s1]

**Table S1.** Ground-based water chemistry samples, corresponding images (Landsat Product ID), and source summary. H-OWT indicates the optical water type (OWT) the sample was classified as using the guided unsupervised hierarchical clustering. Q-OWT indicates the optical water type (OWT) the sample was classified as using the quadratic discriminative analysis (QDA) method. EMS = The Government of British Columbia Environmental Monitoring System (EMS) Surface water monitoring. USGS = National Water System Information (NWIS) and Storage and Retrieval (STORET). SLU = Swedish University of Agricultural Sciences Miljödata MVM Environmental Data.

| Chl- <i>a</i><br>( $\mu\text{g L}^{-1}$ ) | Turbidity<br>(NTU) | Sample Date | Image Date | Landsat<br>Product ID                    | Lag (Days) | Lake Area<br>(Ha) | Ecoregion | Country | Longitude | Latitude | H-OWT | Q-OWT | Source |
|-------------------------------------------|--------------------|-------------|------------|------------------------------------------|------------|-------------------|-----------|---------|-----------|----------|-------|-------|--------|
| 5.0                                       | 9.0                | 7/23/2003   | 7/23/2003  | LT05_L1TP_039034_20030723_20160915_01_T1 | 0          | 25.57             | TPD       | USA     | -114.2    | 38.02    | A     | A     | USGS   |
| 4.0                                       | 5.0                | 9/2/1999    | 8/31/1999  | LT05_L1TP_037032_19990831_20160919_01_T1 | 2          | 16.12             | TPD       | USA     | -109.55   | 40.78    | A     | A     | USGS   |
| 4.4                                       | 28.0               | 9/29/2001   | 10/1/2001  | LT05_L1TP_043029_20011001_20160918_01_T1 | -2         | 95.21             | TPD       | USA     | -118.16   | 43.92    | A     | A     | USGS   |
| 3.7                                       | 10.0               | 10/12/1999  | 10/12/1999 | LT05_L1TP_043029_19991012_20160923_01_T1 | 0          | 417.42            | TPD       | USA     | -118.16   | 43.93    | A     | A     | USGS   |
| 4.4                                       | 5.0                | 7/24/2001   | 7/27/2001  | LT05_L1TP_045029_20010727_20160917_01_T1 | -3         | 208.81            | TPD       | USA     | -120.7    | 44.3     | A     | A     | USGS   |
| 3.0                                       | 12.0               | 8/22/2001   | 8/24/2001  | LT05_L1TP_033032_20010824_20160917_01_T1 | -2         | 331.97            | TPS       | USA     | -104.86   | 39.64    | A     | A     | USGS   |
| 27.2                                      | 78.0               | 10/14/2003  | 10/17/2003 | LT05_L1TP_033032_20031017_20160914_01_T1 | -3         | 336.59            | TPS       | USA     | -104.64   | 40.23    | A     | A     | USGS   |
| 5.7                                       | 8.0                | 7/7/1999    | 7/6/1999   | LE07_L1TP_037032_19990706_20161003_01_T1 | 1          | 10.84             | TPD       | USA     | -109.81   | 40.86    | A     | A     | USGS   |
| 27.7                                      | 8.0                | 9/13/1999   | 9/10/1999  | LT05_L1TP_043029_19990910_20160919_01_T1 | 3          | 467.45            | TPD       | USA     | -118.16   | 43.93    | B     | A     | USGS   |
| 15.4                                      | 14.0               | 9/12/2000   | 9/12/2000  | LT05_L1TP_043029_20000912_20160918_01_T1 | 0          | 313.53            | TPD       | USA     | -118.16   | 43.92    | C     | A     | USGS   |
| 3.9                                       | 7.5                | 8/8/2000    | 8/11/2000  | LT05_L1TP_043029_20000811_20160918_01_T1 | -3         | 414.03            | TPD       | USA     | -118.16   | 43.93    | A     | B     | USGS   |
| 1.5                                       | 0.4                | 8/17/1989   | 8/16/1989  | LT05_L1TP_048023_19890816_20170202_01_T1 | 1          | 29.51             | TCF       | CAN     | -121.67   | 52.55    | B     | B     | EMS    |
| 80.0                                      | 39.0               | 8/12/2009   | 8/15/2009  | LT05_L1TP_193018_20090815_20161026_01_T1 | -3         | 29.41             | TCF       | SWE     | 16.97     | 59.93    | B     | B     | SLU    |
| 14.0                                      | 3.0                | 7/21/2014   | 7/20/2014  | LC08_L1TP_016041_20140720_20170304_01_T1 | 1          | 61.03             | SHF       | USA     | -81.45    | 27.43    | B     | B     | USGS   |
| 49.9                                      | 6.0                | 8/18/2014   | 8/21/2014  | LC08_L1TP_016041_20140821_20170304_01_T1 | -3         | 8.83              | SHF       | USA     | -81.91    | 27.98    | B     | B     | USGS   |
| 7.59                                      | 2.0                | 9/13/2011   | 9/14/2011  | LT05_L1TP_016041_20110914_20160830_01_T1 | -1         | 20.37             | SHF       | USA     | -81.69    | 28.00    | B     | B     | USGS   |
| 38.7                                      | 10.0               | 9/12/2011   | 9/14/2011  | LT05_L1TP_016041_20110914_20160830_01_T1 | -2         | 229.51            | SHF       | USA     | -81.74    | 28.02    | B     | B     | USGS   |
| 44.9                                      | 8.0                | 9/12/2011   | 9/14/2011  | LT05_L1TP_016041_20110914_20160830_01_T1 | -2         | 119.96            | SHF       | USA     | -81.75    | 28.04    | B     | B     | USGS   |
| 36.3                                      | 6.0                | 9/12/2011   | 9/14/2011  | LT05_L1TP_016041_20110914_20160830_01_T1 | -2         | 158.55            | SHF       | USA     | -81.74    | 28.06    | B     | B     | USGS   |
| 27.7                                      | 4.0                | 9/12/2011   | 9/14/2011  | LT05_L1TP_016041_20110914_20160830_01_T1 | -2         | 73.99             | SHF       | USA     | -81.76    | 28.06    | B     | B     | USGS   |
| 30.9                                      | 6.0                | 9/9/2015    | 9/9/2015   | LC08_L1TP_016041_20150909_20170225_01_T1 | 0          | 345.49            | SHF       | USA     | -81.8     | 28.08    | B     | B     | USGS   |
| 87.6                                      | 12.5               | 9/10/2015   | 9/9/2015   | LC08_L1TP_016041_20150909_20170225_01_T1 | 1          | 12.93             | SHF       | USA     | -81.95    | 28.09    | B     | B     | USGS   |
| 27.7                                      | 10.0               | 10/13/2010  | 10/13/2010 | LT05_L1TP_016041_20101013_20160831_01_T1 | 0          | 219.8             | SHF       | USA     | -81.74    | 28.1     | B     | B     | USGS   |
| 171.0                                     | 35.0               | 9/10/2015   | 9/9/2015   | LC08_L1TP_016041_20150909_20170225_01_T1 | 1          | 172.93            | SHF       | USA     | -81.96    | 28.11    | B     | B     | USGS   |
| 4.5                                       | 1.0                | 7/7/2015    | 7/7/2015   | LC08_L1TP_016040_20150707_20170226_01_T1 | 0          | 42.42             | SHF       | USA     | -81.24    | 28.39    | B     | B     | USGS   |
| 23.6                                      | 3.0                | 9/8/2010    | 9/11/2010  | LT05_L1TP_016040_20100911_20160831_01_T1 | -3         | 121.43            | SHF       | USA     | -81.41    | 28.52    | B     | B     | USGS   |
| 19.3                                      | 4.0                | 9/8/2010    | 9/11/2010  | LT05_L1TP_016040_20100911_20160831_01_T1 | -3         | 91.45             | SHF       | USA     | -81.43    | 28.54    | B     | B     | USGS   |
| 7.76                                      | 3.0                | 7/13/2011   | 7/12/2011  | LT05_L1TP_016040_20110712_20160831_01_T1 | 1          | 110.92            | SHF       | USA     | -81.82    | 28.6     | B     | B     | USGS   |
| 49.41                                     | 17.5               | 9/14/2010   | 9/11/2010  | LT05_L1TP_016040_20100911_20160831_01_T1 | 3          | 12304.63          | SHF       | USA     | -81.63    | 28.62    | B     | B     | USGS   |
| 73.5                                      | 9.0                | 9/13/2010   | 9/11/2010  | LT05_L1TP_016040_20100911_20160831_01_T1 | 2          | 139.89            | SHF       | USA     | -81.66    | 28.76    | B     | B     | USGS   |
| 69.63                                     | 23.5               | 8/19/2014   | 8/21/2014  | LC08_L1TP_016040_20140821_20170304_01_T1 | -2         | 87.38             | SHF       | USA     | -81.91    | 28.77    | B     | B     | USGS   |
| 3.43                                      | 1.0                | 7/14/2011   | 7/12/2011  | LT05_L1TP_016040_20110712_20160831_01_T1 | 2          | 17.32             | SHF       | USA     | -81.34    | 29.18    | B     | B     | USGS   |
| 4.24                                      | 2.0                | 9/14/2011   | 9/14/2011  | LT05_L1TP_016040_20110914_20160830_01_T1 | 0          | 18.21             | SHF       | USA     | -81.33    | 29.18    | B     | B     | USGS   |
| 80.29                                     | 10.0               | 8/16/2011   | 8/13/2011  | LT05_L1TP_016040_20110813_20160831_01_T1 | 3          | 19376.97          | SHF       | USA     | -81.61    | 29.30    | B     | B     | USGS   |
| 49.79                                     | 10.0               | 9/12/2011   | 9/14/2011  | LT05_L1TP_016040_20110914_20160830_01_T1 | -2         | 6784.88           | SHF       | USA     | -81.5     | 29.46    | B     | B     | USGS   |
| 46.27                                     | 9.0                | 8/11/2011   | 8/13/2011  | LT05_L1TP_016040_20110813_20160831_01_T1 | -2         | 6929.03           | SHF       | USA     | -81.5     | 29.46    | B     | B     | USGS   |
| 16.0                                      | 3.0                | 8/13/2007   | 8/15/2007  | LT05_L1TP_027033_20070815_20160910_01_T1 | -2         | 20.11             | TPS       | USA     | -94.69    | 38.19    | B     | B     | USGS   |

| Chl- <i>a</i><br>( $\mu\text{g L}^{-1}$ ) | Turbidity<br>(NTU) | Sample Date | Image Date | Landsat<br>Product ID                    | Lag (Days) | Lake Area<br>(Ha) | Ecoregion | Country | Longitude | Latitude | H-OWT | Q-OWT | Source |
|-------------------------------------------|--------------------|-------------|------------|------------------------------------------|------------|-------------------|-----------|---------|-----------|----------|-------|-------|--------|
| 18.5                                      | 2.0                | 7/26/1999   | 7/24/1999  | LT05_L1TP_027033_19990724_20160919_01_T1 | 2          | 111.02            | TPS       | USA     | -95.63    | 39.00    | B     | B     | USGS   |
| 41.0                                      | 15.5               | 7/28/1989   | 7/28/1989  | LT05_L1TP_027033_19890728_20161001_01_T1 | 0          | 32.18             | TPS       | USA     | -95.16    | 38.80    | B     | B     | USGS   |
| 18.4                                      | 4.0                | 10/21/2010  | 10/22/2010 | LT05_L1TP_015042_20101022_20160831_01_T1 | -1         | 36.54             | TMF       | USA     | -80.08    | 26.60    | B     | B     | USGS   |
| 39.5                                      | 9.0                | 9/8/2015    | 9/9/2015   | LC08_L1TP_016041_20150909_20170225_01_T1 | -1         | 223.56            | SHF       | USA     | -81.74    | 28.10    | B     | B     | USGS   |
| 4.8                                       | 1.0                | 8/6/2014    | 8/5/2014   | LC08_L1TP_016040_20140805_20170304_01_T1 | 1          | 14.88             | SHF       | USA     | -81.57    | 28.47    | B     | B     | USGS   |
| 47.9                                      | 7.33               | 8/20/2014   | 8/21/2014  | LC08_L1TP_016040_20140821_20170304_01_T1 | -1         | 697.28            | SHF       | USA     | -81.25    | 28.71    | B     | B     | USGS   |
| 43.1                                      | 9.0                | 9/13/2010   | 9/11/2010  | LT05_L1TP_016040_20100911_20160831_01_T1 | 2          | 2094.84           | SHF       | USA     | -81.67    | 28.80    | B     | B     | USGS   |
| 4.8                                       | 1.0                | 8/19/2014   | 8/21/2014  | LC08_L1TP_016040_20140821_20170304_01_T1 | -2         | 34.07             | SHF       | USA     | -81.52    | 28.49    | E     | B     | USGS   |
| 16.2                                      | 5.0                | 10/7/2014   | 10/8/2014  | LC08_L1TP_016040_20141008_20170303_01_T1 | -1         | 2110.53           | SHF       | USA     | -81.94    | 29.01    | F     | B     | USGS   |
| 92.3                                      | 13.5               | 7/7/2010    | 7/9/2010   | LT05_L1TP_016041_20100709_20160901_01_T1 | -2         | 75.6              | SHF       | USA     | -81.9     | 27.98    | C     | C     | USGS   |
| 57.3                                      | 9.0                | 7/8/2010    | 7/9/2010   | LT05_L1TP_016041_20100709_20160901_01_T1 | -1         | 29.46             | SHF       | USA     | -81.97    | 28.03    | C     | C     | USGS   |
| 17.3                                      | 2.0                | 7/6/2010    | 7/9/2010   | LT05_L1TP_016040_20100709_20160901_01_T1 | -3         | 21.33             | SHF       | USA     | -80.79    | 28.07    | C     | C     | USGS   |
| 8.3                                       | 2.0                | 7/12/2010   | 7/9/2010   | LT05_L1TP_016041_20100709_20160901_01_T1 | 3          | 22.4              | SHF       | USA     | -81.73    | 28.08    | C     | C     | USGS   |
| 8.4                                       | 5.0                | 7/12/2010   | 7/9/2010   | LT05_L1TP_016041_20100709_20160901_01_T1 | 3          | 219.09            | SHF       | USA     | -81.74    | 28.10    | C     | C     | USGS   |
| 9.0                                       | 2.0                | 7/12/2010   | 7/9/2010   | LT05_L1TP_016041_20100709_20160901_01_T1 | 3          | 20.97             | SHF       | USA     | -81.73    | 28.10    | C     | C     | USGS   |
| 32.9                                      | 5.0                | 7/6/2010    | 7/9/2010   | LT05_L1TP_016041_20100709_20160901_01_T1 | -3         | 170.07            | SHF       | USA     | -81.96    | 28.11    | C     | C     | USGS   |
| 37.0                                      | 4.0                | 9/8/2015    | 9/9/2015   | LC08_L1TP_016040_20150909_20170225_01_T1 | -1         | 28.87             | SHF       | USA     | -81.57    | 28.52    | C     | C     | USGS   |
| 82.2                                      | 14.0               | 7/7/2010    | 7/9/2010   | LT05_L1TP_016040_20100709_20160901_01_T1 | -2         | 87.89             | SHF       | USA     | -81.91    | 28.77    | C     | C     | USGS   |
| 37..                                      | 10.0               | 7/8/2010    | 7/9/2010   | LT05_L1TP_016040_20100709_20160901_01_T1 | -1         | 6948.51           | SHF       | USA     | -81.54    | 29.51    | C     | C     | USGS   |
| 20.0                                      | 12.5               | 7/21/1998   | 7/21/1998  | LT05_L1TP_027033_19980721_20160922_01_T1 | 0          | 34.66             | TPS       | USA     | -95.52    | 39.68    | C     | C     | USGS   |
| 21.5                                      | 1.0                | 9/3/1987    | 8/31/1987  | LT05_L1TP_028027_19870831_20161002_01_T1 | 3          | 13.5              | TCF       | USA     | -93.53    | 46.64    | C     | C     | USGS   |
| 20.2                                      | 1.0                | 9/3/1987    | 8/31/1987  | LT05_L1TP_028027_19870831_20161002_01_T1 | 3          | 104.37            | TCF       | USA     | -93.52    | 46.65    | C     | C     | USGS   |
| 91.7                                      | 39.0               | 9/14/2011   | 9/14/2011  | LT05_L1TP_016040_20110914_20160830_01_T1 | 0          | 89.96             | SHF       | USA     | -81.91    | 28.77    | C     | C     | USGS   |
| 16.0                                      | 3.0                | 8/9/2000    | 8/11/2000  | LT05_L1TP_027033_20000811_20160918_01_T1 | -2         | 2750.03           | TPS       | USA     | -95.39    | 38.9     | C     | C     | USGS   |
| 39.0                                      | 34.5               | 8/23/2010   | 8/23/2010  | LT05_L1TP_027033_20100823_20160901_01_T1 | 0          | 52.57             | TPS       | USA     | -96.15    | 39.71    | C     | C     | USGS   |
| 1.5                                       | 3.0                | 8/28/1996   | 8/31/1996  | LT05_L1TP_036032_19960831_20160925_01_T1 | -3         | 27.65             | TPD       | USA     | -109.7    | 40.25    | C     | C     | USGS   |
| 10.6                                      | 15.0               | 9/28/2000   | 9/28/2000  | LT05_L1TP_043029_20000928_20160918_01_T1 | 0          | 286.96            | TPD       | USA     | -118.16   | 43.92    | C     | C     | USGS   |
| 0.6                                       | 0.5                | 7/2/1985    | 7/4/1985   | LT05_L1TP_048026_19850704_20161004_01_T1 | -2         | 44.65             | TCF       | CAN     | -124.11   | 48.81    | D     | D     | EMS    |
| 1.3                                       | 1.3                | 7/16/1985   | 7/16/1985  | LT05_L1TP_052022_19850716_20170219_01_T1 | 0          | 328.93            | TCF       | CAN     | -127.04   | 54.71    | D     | D     | EMS    |
| 2.4                                       | 2.5                | 7/23/2002   | 7/23/2002  | LE07_L1TP_052022_20020723_20170128_01_T1 | 0          | 112.94            | TCF       | CAN     | -127.21   | 54.82    | D     | D     | EMS    |
| 2.4                                       | 2.0                | 7/18/1997   | 7/15/1997  | LT05_L1TP_038032_19970715_20160923_01_T1 | 3          | 212.47            | TPD       | USA     | -111.59   | 40.91    | D     | D     | USGS   |
| 1.4                                       | 1.0                | 7/2/1998    | 7/2/1998   | LT05_L1TP_038032_19980702_20160923_01_T1 | 0          | 497.98            | TPD       | USA     | -111.41   | 40.96    | D     | D     | USGS   |
| 3.1                                       | 3.0                | 8/16/1999   | 8/17/1999  | LE07_L1TP_043028_19990817_20161002_01_T1 | 0          | 266.72            | TPD       | USA     | -118.79   | 45.59    | D     | D     | USGS   |
| 0.5                                       | 2.8                | 8/1/2007    | 8/2/2007   | LT05_L1TP_048026_20070802_20160908_01_T1 | -1         | 191.15            | TCF       | CAN     | -123.4    | 48.53    | D     | D     | EMS    |
| 0.7                                       | 0.5                | 7/3/1985    | 7/4/1985   | LT05_L1TP_048026_19850704_20161004_01_T1 | -1         | 9.7               | TCF       | CAN     | -123.83   | 48.96    | D     | D     | EMS    |
| 0.6                                       | 0.5                | 8/8/1985    | 8/5/1985   | LT05_L1TP_048026_19850805_20161004_01_T1 | 3          | 10.86             | TCF       | CAN     | -123.83   | 48.96    | D     | D     | EMS    |
| 0.7                                       | 0.4                | 7/9/2002    | 7/6/2002   | LE07_L1TP_045026_20020706_20160929_01_T1 | 3          | 53.79             | TCF       | CAN     | -118.61   | 49.17    | D     | D     | EMS    |
| 2.5                                       | 0.7                | 8/8/1985    | 8/5/1985   | LT05_L1TP_048026_19850805_20161004_01_T1 | 3          | 45.4              | TCF       | CAN     | -124      | 49.16    | E     | D     | EMS    |
| 4.0                                       | 0.9                | 8/15/1984   | 8/16/1984  | LT05_L1TP_050022_19840816_20170220_01_T1 | -1         | 172.77            | TCF       | CAN     | -126.36   | 54.18    | E     | D     | EMS    |
| 3.1                                       | 1.3                | 7/16/1985   | 7/16/1985  | LT05_L1TP_052022_19850716_20170219_01_T1 | 0          | 110.76            | TCF       | CAN     | -127.21   | 54.82    | F     | D     | EMS    |
| 2.2                                       | 1.0                | 7/27/1995   | 7/26/1995  | LT05_L1TP_038032_19950726_20160926_01_T1 | 1          | 211.98            | TPD       | USA     | -111.59   | 40.91    | G     | D     | USGS   |
| 66.0                                      | 7.0                | 8/12/2009   | 8/15/2009  | LT05_L1TP_193018_20090815_20161026_01_T1 | -3         | 21.94             | TCF       | SWE     | 16.87     | 60.16    | G     | D     | SLU    |
| 1.4                                       | 2.0                | 9/28/2015   | 9/25/2015  | LC08_L1TP_016040_20150925_20170225_01_T1 | 3          | 82.05             | SHF       | USA     | -81.9     | 29.23    | A     | E     | USGS   |
| 2.7                                       | 5.0                | 9/14/2011   | 9/14/2011  | LT05_L1TP_016040_20110914_20160830_01_T1 | 0          | 678.14            | SHF       | USA     | -81.4     | 29.28    | A     | E     | USGS   |

| Chl- <i>a</i><br>( $\mu\text{g L}^{-1}$ ) | Turbidity<br>(NTU) | Sample Date | Image Date | Landsat<br>Product ID                    | Lag (Days) | Lake Area<br>(Ha) | Ecoregion | Country | Longitude | Latitude | H-OWT | Q-OWT | Source |
|-------------------------------------------|--------------------|-------------|------------|------------------------------------------|------------|-------------------|-----------|---------|-----------|----------|-------|-------|--------|
| 1.1                                       | 2.0                | 7/6/1999    | 7/7/1999   | LT05_L1TP_036032_19990707_20160919_01_T1 | -1         | 271.87            | TPD       | USA     | -109.53   | 40.52    | A     | E     | USGS   |
| 4.4                                       | 4.6                | 8/14/2015   | 8/16/2015  | LC08_L1TP_193018_20150816_20170406_01_T1 | -2         | 11463.91          | TCF       | SWE     | 17.5      | 59.29    | D     | E     | SLU    |
| 7.0                                       | 6.6                | 7/11/2013   | 7/9/2013   | LC08_L1TP_193018_20130709_20170504_01_T1 | 2          | 4628.74           | TCF       | SWE     | 17.53     | 59.72    | D     | E     | SLU    |
| 1.2                                       | 1.0                | 7/14/1998   | 7/11/1998  | LT05_L1TP_037032_19980711_20160923_01_T1 | 3          | 39.5              | TPD       | USA     | -110.85   | 40.31    | D     | E     | USGS   |
| 1.3                                       | 2.0                | 8/4/1999    | 8/7/1999   | LE07_L1TP_037032_19990807_20161003_01_T1 | -3         | 61.38             | TPD       | USA     | -111.1    | 40.76    | D     | E     | USGS   |
| 33.3                                      | 2.5                | 8/24/1989   | 8/27/1989  | LT04_L1TP_037032_19890827_20161001_01_T1 | -3         | 4447.85           | TPD       | USA     | -111.12   | 40.17    | E     | E     | USGS   |
| 6.7                                       | 1.0                | 9/26/1995   | 9/28/1995  | LT05_L1TP_038032_19950928_20160926_01_T1 | -2         | 178.8             | TPD       | USA     | -111.59   | 40.91    | E     | E     | USGS   |
| 69.1                                      | 4.0                | 8/26/2015   | 8/24/2015  | LC08_L1TP_016041_20150824_20170225_01_T1 | 2          | 195.91            | SHF       | USA     | -82.28    | 28.06    | E     | E     | USGS   |
| 7.5                                       | 1.8                | 10/28/2009  | 10/26/2009 | LT05_L1TP_048026_20091026_20160903_01_T1 | 2          | 52.1              | TCF       | CAN     | -123.53   | 48.45    | E     | E     | EMS    |
| 23.0                                      | 2.0                | 8/29/1994   | 8/30/1994  | LT05_L1TP_048024_19940830_20170112_01_T1 | -1         | 641.67            | TCF       | CAN     | -122.05   | 52.11    | E     | E     | EMS    |
| 16.0                                      | 4.7                | 8/28/2013   | 8/26/2013  | LC08_L1TP_193018_20130826_20170502_01_T1 | 2          | 4491.8            | TCF       | SWE     | 17.53     | 59.72    | E     | E     | SLU    |
| 53.3                                      | 4.0                | 10/31/2013  | 10/30/2013 | LC08_L1TP_015042_20131030_20170308_01_T1 | 1          | 24.77             | TMF       | USA     | -80.08    | 26.48    | E     | E     | USGS   |
| 26.1                                      | 4.0                | 10/21/2010  | 10/22/2010 | LT05_L1TP_015042_20101022_20160831_01_T1 | -1         | 26.21             | TMF       | USA     | -80.08    | 26.48    | E     | E     | USGS   |
| 64.4                                      | 4.0                | 1/8/2001    | 1/6/2001   | LE07_L1TP_015042_20010106_20161001_01_T1 | 2          | 22.32             | TMF       | USA     | -80.08    | 26.58    | E     | E     | USGS   |
| 17.6                                      | 4.0                | 1/8/2001    | 1/6/2001   | LE07_L1TP_015042_20010106_20161001_01_T1 | 2          | 35.48             | TMF       | USA     | -80.08    | 26.6     | E     | E     | USGS   |
| 27.9                                      | 3.0                | 1/8/2001    | 1/6/2001   | LE07_L1TP_015042_20010106_20161001_01_T1 | 2          | 26                | TMF       | USA     | -80.08    | 26.61    | E     | E     | USGS   |
| 14.1                                      | 2.0                | 9/14/2010   | 9/11/2010  | LT05_L1TP_016041_20100911_20160831_01_T1 | 3          | 462.29            | SHF       | USA     | -81.55    | 27.74    | E     | E     | USGS   |
| 5.8                                       | 1.0                | 8/5/2013    | 8/2/2013   | LC08_L1TP_016041_20130802_20170309_01_T1 | 3          | 16.94             | SHF       | USA     | -81.77    | 28.01    | E     | E     | USGS   |
| 43.0                                      | 3.0                | 9/10/2015   | 9/9/2015   | LC08_L1TP_016041_20150909_20170225_01_T1 | 1          | 14.88             | SHF       | USA     | -81.93    | 28.11    | E     | E     | USGS   |
| 37.0                                      | 5.0                | 9/9/2015    | 9/9/2015   | LC08_L1TP_016041_20150909_20170225_01_T1 | 0          | 351.74            | SHF       | USA     | -81.8     | 28.13    | E     | E     | USGS   |
| 8.1                                       | 2.0                | 10/14/2010  | 10/13/2010 | LT05_L1TP_016041_20101013_20160831_01_T1 | 1          | 35.45             | SHF       | USA     | -81.81    | 28.14    | E     | E     | USGS   |
| 12.0                                      | 1.0                | 9/9/2015    | 9/9/2015   | LC08_L1TP_016041_20150909_20170225_01_T1 | 0          | 35.73             | SHF       | USA     | -81.81    | 28.14    | E     | E     | USGS   |
| 4.5                                       | 1.0                | 9/22/2015   | 9/25/2015  | LC08_L1TP_016040_20150925_20170225_01_T1 | -3         | 33.4              | SHF       | USA     | -81.48    | 28.42    | E     | E     | USGS   |
| 4.8                                       | 1.0                | 8/19/2014   | 8/21/2014  | LC08_L1TP_016040_20140821_20170304_01_T1 | -2         | 22.4              | SHF       | USA     | -81.55    | 28.46    | E     | E     | USGS   |
| 8.2                                       | 1.5                | 10/12/2010  | 10/13/2010 | LT05_L1TP_016040_20101013_20160831_01_T1 | -1         | 85.05             | SHF       | USA     | -81.39    | 28.48    | E     | E     | USGS   |
| 20.9                                      | 3.0                | 10/12/2010  | 10/13/2010 | LT05_L1TP_016040_20101013_20160831_01_T1 | -1         | 8.82              | SHF       | USA     | -81.37    | 28.5     | E     | E     | USGS   |
| 14.5                                      | 3.0                | 10/12/2010  | 10/13/2010 | LT05_L1TP_016040_20101013_20160831_01_T1 | -1         | 18.56             | SHF       | USA     | -81.37    | 28.51    | E     | E     | USGS   |
| 19.7                                      | 1.0                | 9/8/2015    | 9/9/2015   | LC08_L1TP_016040_20150909_20170225_01_T1 | -1         | 160.49            | SHF       | USA     | -81.66    | 28.53    | E     | E     | USGS   |
| 3.2                                       | 1.0                | 10/26/2010  | 10/29/2010 | LT05_L1TP_016040_20101029_20160831_01_T1 | -3         | 24.75             | SHF       | USA     | -81.17    | 28.6     | E     | E     | USGS   |
| 32.1                                      | 5.0                | 9/14/2010   | 9/11/2010  | LT05_L1TP_016040_20100911_20160831_01_T1 | 3          | 6898.61           | SHF       | USA     | -81.5     | 29.46    | E     | E     | USGS   |
| 4.0                                       | 1.0                | 8/25/1999   | 8/27/1999  | LT05_L1TP_025028_19990827_20160919_01_T1 | -2         | 56.11             | TCF       | USA     | -89.89    | 45.96    | E     | E     | USGS   |
| 18.4                                      | 1.5                | 9/5/1995    | 9/2/1995   | LT05_L1TP_048024_19950902_20170106_01_T1 | 3          | 642.23            | TCF       | CAN     | -122.05   | 52.11    | E     | E     | EMS    |
| 7.6                                       | 1.4                | 7/25/2002   | 7/25/2002  | LE07_L1TP_050022_20020725_20170130_01_T1 | 0          | 562.98            | TCF       | CAN     | -125.88   | 54.32    | E     | E     | EMS    |
| 200.0                                     | 10.0               | 8/22/2017   | 8/21/2017  | LC08_L1TP_193018_20170821_20170911_01_T1 | 1          | 166.26            | TCF       | SWE     | 18.04     | 59.20    | E     | E     | SLU    |
| 31.0                                      | 3.4                | 8/22/2017   | 8/21/2017  | LC08_L1TP_193018_20170821_20170911_01_T1 | 1          | 45.08             | TCF       | SWE     | 18.09     | 59.23    | E     | E     | SLU    |
| 18.0                                      | 4.7                | 8/29/2013   | 8/26/2013  | LC08_L1TP_193018_20130826_20170502_01_T1 | 3          | 2297.75           | TCF       | SWE     | 17.73     | 59.6     | E     | E     | SLU    |
| 54.1                                      | 2.0                | 10/31/2013  | 10/30/2013 | LC08_L1TP_015042_20131030_20170308_01_T1 | 1          | 22.39             | TMF       | USA     | -80.08    | 26.61    | E     | E     | USGS   |
| 9.7                                       | 1.0                | 10/30/2013  | 10/30/2013 | LC08_L1TP_015042_20131030_20170308_01_T1 | 0          | 32.34             | TMF       | USA     | -80.07    | 26.71    | E     | E     | USGS   |
| 95.8                                      | 15.0               | 10/27/2014  | 10/24/2014 | LC08_L1TP_016041_20141024_20170303_01_T1 | 3          | 212.47            | SHF       | USA     | -80.67    | 27.69    | E     | E     | USGS   |
| 9.1                                       | 2.0                | 8/19/2014   | 8/21/2014  | LC08_L1TP_016041_20140821_20170304_01_T1 | -2         | 2288.22           | SHF       | USA     | -80.76    | 27.71    | E     | E     | USGS   |
| 6.35                                      | 1.0                | 10/21/2013  | 10/21/2013 | LC08_L1TP_016041_20131021_20170308_01_T1 | 0          | 44.22             | SHF       | USA     | -80.77    | 28.08    | E     | E     | USGS   |
| 16.2                                      | 2.0                | 9/8/2015    | 9/9/2015   | LC08_L1TP_016041_20150909_20170225_01_T1 | -1         | 19.1              | SHF       | USA     | -81.73    | 28.10    | E     | E     | USGS   |
| 9.1                                       | 1.0                | 8/19/2014   | 8/21/2014  | LC08_L1TP_016040_20140821_20170304_01_T1 | -2         | 871.89            | SHF       | USA     | -80.75    | 28.15    | E     | E     | USGS   |
| 17.0                                      | 3.0                | 10/8/2014   | 10/8/2014  | LC08_L1TP_016040_20141008_20170303_01_T1 | 0          | 107.37            | SHF       | USA     | -81.82    | 28.17    | E     | E     | USGS   |

| Chl- <i>a</i><br>( $\mu\text{g L}^{-1}$ ) | Turbidity<br>(NTU) | Sample Date | Image Date | Landsat<br>Product ID                    | Lag (Days) | Lake Area<br>(Ha) | Ecoregion | Country | Longitude | Latitude | H-OWT | Q-OWT | Source |
|-------------------------------------------|--------------------|-------------|------------|------------------------------------------|------------|-------------------|-----------|---------|-----------|----------|-------|-------|--------|
| 4.0                                       | 1.0                | 10/11/2010  | 10/13/2010 | LT05_L1TP_016040_20101013_20160831_01_T1 | -2         | 230.62            | SHF       | USA     | -81.36    | 28.48    | E     | E     | USGS   |
| 4.6                                       | 1.0                | 10/11/2010  | 10/13/2010 | LT05_L1TP_016040_20101013_20160831_01_T1 | -2         | 82.51             | SHF       | USA     | -81.39    | 28.51    | E     | E     | USGS   |
| 6.0                                       | 1.0                | 10/26/2010  | 10/29/2010 | LT05_L1TP_016040_20101029_20160831_01_T1 | -3         | 31.35             | SHF       | USA     | -81.13    | 28.58    | E     | E     | USGS   |
| 10.7                                      | 1.0                | 10/8/2013   | 10/5/2013  | LC08_L1TP_016040_20131005_20170308_01_T1 | 3          | 26.12             | SHF       | USA     | -81.27    | 28.59    | E     | E     | USGS   |
| 6.8                                       | 1.0                | 10/26/2010  | 10/29/2010 | LT05_L1TP_016040_20101029_20160831_01_T1 | -3         | 11.61             | SHF       | USA     | -81.1     | 28.59    | E     | E     | USGS   |
| 8.4                                       | 2.0                | 8/19/2014   | 8/21/2014  | LC08_L1TP_016040_20140821_20170304_01_T1 | -2         | 122.47            | SHF       | USA     | -81.81    | 28.60    | E     | E     | USGS   |
| 14.0                                      | 2.0                | 9/28/2011   | 9/30/2011  | LT05_L1TP_016040_20110930_20160830_01_T1 | -2         | 3106.47           | SHF       | USA     | -81.27    | 28.84    | E     | E     | USGS   |
| 30.2                                      | 1.0                | 8/29/1996   | 8/29/1996  | LT05_L1TP_038032_19960829_20160925_01_T1 | 0          | 5412.63           | TPD       | USA     | -111.12   | 40.17    | E     | E     | USGS   |
| 26.3                                      | 1.0                | 9/3/1997    | 9/1/1997   | LT05_L1TP_038032_19970901_20160924_01_T1 | 2          | 5380.07           | TPD       | USA     | -111.13   | 40.17    | E     | E     | USGS   |
| 10.7                                      | 1.0                | 9/3/1997    | 9/1/1997   | LT05_L1TP_038032_19970901_20160924_01_T1 | 2          | 85.79             | TPD       | USA     | -111.06   | 40.34    | E     | E     | USGS   |
| 3.7                                       | 1.0                | 9/28/1995   | 9/28/1995  | LT05_L1TP_038032_19950928_20160926_01_T1 | 0          | 22.76             | TPD       | USA     | -110.93   | 40.83    | E     | E     | USGS   |
| 11.2                                      | 1.0                | 9/16/1986   | 9/13/1986  | LT05_L1TP_028027_19860913_20161003_01_T1 | 3          | 141.53            | TCF       | USA     | -94.47    | 47.55    | E     | E     | USGS   |
| 0.6                                       | 0.3                | 7/16/2008   | 7/19/2008  | LT05_L1TP_048026_20080719_20160908_01_T1 | -3         | 5900.76           | TCF       | CAN     | -124.26   | 48.87    | F     | E     | EMS    |
| 1.8                                       | 0.8                | 7/22/2008   | 7/19/2008  | LT05_L1TP_048026_20080719_20160908_01_T1 | 3          | 6.74              | TCF       | CAN     | -124.01   | 49.2     | F     | E     | EMS    |
| 9.8                                       | 4.3                | 9/21/2016   | 9/19/2016  | LC08_L1TP_193018_20160919_20170321_01_T1 | 2          | 2316.29           | TCF       | SWE     | 17.73     | 59.6     | F     | E     | SLU    |
| 2.4                                       | 2.0                | 7/12/2011   | 7/12/2011  | LT05_L1TP_016040_20110712_20160831_01_T1 | 0          | 14.5              | SHF       | USA     | -81.15    | 28.58    | F     | E     | USGS   |
| 1.4                                       | 1.0                | 8/13/1997   | 8/16/1997  | LT05_L1TP_038032_19970816_20160925_01_T1 | -3         | 50.02             | TPD       | USA     | -111.24   | 39.58    | F     | E     | USGS   |
| 7.8                                       | 3.0                | 9/14/2010   | 9/11/2010  | LT05_L1TP_016040_20100911_20160831_01_T1 | 3          | 409.58            | SHF       | USA     | -81.64    | 28.53    | F     | E     | USGS   |
| 3.3                                       | 1.0                | 10/26/2010  | 10/29/2010 | LT05_L1TP_016040_20101029_20160831_01_T1 | -3         | 249.49            | SHF       | USA     | -81.11    | 28.6     | F     | E     | USGS   |
| 4.8                                       | 2.0                | 8/16/1989   | 8/19/1989  | LT05_L1TP_037032_19890819_20161002_01_T1 | -3         | 74.72             | TPD       | USA     | -111.06   | 40.34    | F     | E     | USGS   |
| 4.2                                       | 2.0                | 9/22/1987   | 9/22/1987  | LT05_L1TP_038032_19870922_20161002_01_T1 | 0          | 634.95            | TPD       | USA     | -111.5    | 40.44    | F     | E     | USGS   |
| 2.5                                       | 1.0                | 9/29/1998   | 9/29/1998  | LT05_L1TP_037032_19980929_20160924_01_T1 | 0          | 9.74              | TPD       | USA     | -110.95   | 40.68    | F     | E     | USGS   |
| 7.3                                       | 2.0                | 8/10/1995   | 8/11/1995  | LT05_L1TP_038032_19950811_20160926_01_T1 | -1         | 216.12            | TPD       | USA     | -111.59   | 40.91    | F     | E     | USGS   |
| 7.6                                       | 2.0                | 7/20/1999   | 7/21/1999  | LT05_L1TP_038032_19990721_20160923_01_T1 | -1         | 213.61            | TPD       | USA     | -111.59   | 40.91    | F     | E     | USGS   |
| 8.4                                       | 2.0                | 9/28/1994   | 9/25/1994  | LT05_L1TP_038032_19940925_20160927_01_T1 | 3          | 145.21            | TPD       | USA     | -111.59   | 40.91    | F     | E     | USGS   |
| 4.6                                       | 2.0                | 10/27/1999  | 10/25/1999 | LT05_L1TP_038032_19991025_20160919_01_T1 | 2          | 172.44            | TPD       | USA     | -111.59   | 40.91    | G     | E     | USGS   |
| 24.9                                      | 25.0               | 8/9/2001    | 8/10/2001  | LT05_L1TP_015042_20010810_20160917_01_T1 | -1         | 48589.89          | TMF       | USA     | -80.81    | 26.83    | D     | F     | USGS   |
| 1.3                                       | 1.2                | 9/11/2002   | 9/8/2002   | LE07_L1TP_045026_20020908_20160928_01_T1 | 3          | 16.06             | TCF       | CAN     | -119.73   | 49.32    | D     | F     | EMS    |
| 46.4                                      | 7.0                | 8/19/2014   | 8/21/2014  | LC08_L1TP_016041_20140821_20170304_01_T1 | -2         | 1760.15           | SHF       | USA     | -81.84    | 27.97    | E     | F     | USGS   |
| 7.6                                       | 2.0                | 7/29/2003   | 7/26/2003  | LT05_L1TP_044028_20030726_20160915_01_T1 | 3          | 277.87            | TPD       | USA     | -119.16   | 45.86    | E     | F     | USGS   |
| 58.7                                      | 2.6                | 8/4/2011    | 8/5/2011   | LT05_L1TP_193018_20110805_20161009_01_T1 | -1         | 6.58              | TCF       | SWE     | 18.03     | 59.21    | E     | F     | SLU    |
| 9.0                                       | 2.0                | 9/14/2010   | 9/11/2010  | LT05_L1TP_016040_20100911_20160831_01_T1 | 3          | 78.8              | SHF       | USA     | -81.6     | 28.53    | E     | F     | USGS   |
| 3.6                                       | 1.9                | 8/4/2011    | 8/5/2011   | LT05_L1TP_193018_20110805_20161009_01_T1 | -1         | 6.53              | TCF       | SWE     | 18.2      | 59.18    | F     | F     | SLU    |
| 1.4                                       | 1.0                | 8/6/1999    | 8/6/1999   | LT05_L1TP_038032_19990806_20160923_01_T1 | 0          | 863.77            | TPD       | USA     | -111.49   | 40.44    | F     | F     | USGS   |
| 1.0                                       | 0.5                | 7/3/1985    | 7/4/1985   | LT05_L1TP_048026_19850704_20161004_01_T1 | -1         | 44.02             | TCF       | CAN     | -124      | 49.16    | F     | F     | EMS    |
| 1.2                                       | 0.5                | 7/22/2008   | 7/19/2008  | LT05_L1TP_048026_20080719_20160908_01_T1 | 3          | 7.46              | TCF       | CAN     | -124.06   | 49.23    | F     | F     | EMS    |
| 1.3                                       | 0.7                | 9/29/2004   | 9/26/2004  | LT05_L1TP_048026_20040926_20160913_01_T1 | 3          | 24.28             | TCF       | CAN     | -124.63   | 49.35    | F     | F     | EMS    |
| 0.5                                       | 0.2                | 8/12/1992   | 8/15/1992  | LT05_L1TP_049025_19920815_20170122_01_T1 | -3         | 52.04             | TCF       | CAN     | -125.48   | 49.92    | F     | F     | EMS    |
| 0.5                                       | 0.2                | 8/19/2010   | 8/17/2010  | LT05_L1TP_049025_20100817_20161014_01_T1 | 2          | 262.63            | TCF       | CAN     | -125.35   | 50.04    | F     | F     | EMS    |
| 11.02                                     | 6.6                | 7/11/2013   | 7/9/2013   | LC08_L1TP_193018_20130709_20170504_01_T1 | 2          | 86661.9           | TCF       | SWE     | 17.24     | 59.43    | F     | F     | SLU    |
| 31.42                                     | 12.0               | 10/22/2002  | 10/24/2002 | LE07_L1TP_015042_20021024_20160928_01_T1 | -2         | 42994.63          | TMF       | USA     | -80.82    | 26.82    | F     | F     | USGS   |
| 2.6                                       | 1.0                | 10/11/2010  | 10/13/2010 | LT05_L1TP_016040_20101013_20160831_01_T1 | -2         | 119.24            | SHF       | USA     | -81.35    | 28.46    | F     | F     | USGS   |
| 2.5                                       | 1.0                | 10/11/2010  | 10/13/2010 | LT05_L1TP_016040_20101013_20160831_01_T1 | -2         | 266.42            | SHF       | USA     | -81.35    | 28.47    | F     | F     | USGS   |
| 2.9                                       | 1.0                | 9/13/2010   | 9/11/2010  | LT05_L1TP_016040_20100911_20160831_01_T1 | 2          | 153.6             | SHF       | USA     | -81.63    | 28.75    | F     | F     | USGS   |

| Chl- <i>a</i><br>( $\mu\text{g L}^{-1}$ ) | Turbidity<br>(NTU) | Sample Date | Image Date | Landsat<br>Product ID                    | Lag (Days) | Lake Area<br>(Ha) | Ecoregion | Country | Longitude | Latitude | H-OWT | Q-OWT | Source |
|-------------------------------------------|--------------------|-------------|------------|------------------------------------------|------------|-------------------|-----------|---------|-----------|----------|-------|-------|--------|
| 28.6                                      | 7.0                | 10/27/2014  | 10/24/2014 | LC08_L1TP_016040_20141024_20170303_01_T1 | 3          | 1472.24           | SHF       | USA     | -81.74    | 28.92    | F     | F     | USGS   |
| 13.5                                      | 0.6                | 10/7/1996   | 10/6/1996  | LT05_L1TP_048024_19961006_20170103_01_T1 | 1          | 668.78            | TCF       | CAN     | -122.05   | 52.11    | E     | G     | EMS    |
| 18.0                                      | 1.6                | 8/22/2017   | 8/21/2017  | LC08_L1TP_193018_20170821_20170911_01_T1 | 1          | 192.47            | TCF       | SWE     | 18.18     | 59.21    | E     | G     | SLU    |
| 3.0                                       | 0.5                | 10/8/1985   | 10/8/1985  | LT05_L1TP_048026_19851008_20161004_01_T1 | 0          | 16.06             | TCF       | CAN     | -123.67   | 48.50    | G     | G     | EMS    |
| 0.7                                       | 0.4                | 7/23/2003   | 7/22/2003  | LT05_L1TP_048026_20030722_20160915_01_T1 | 1          | 429.5             | TCF       | CAN     | -123.63   | 48.61    | G     | G     | EMS    |
| 1.2                                       | 0.6                | 10/7/1985   | 10/8/1985  | LT05_L1TP_048026_19851008_20161004_01_T1 | -1         | 45.58             | TCF       | CAN     | -124.11   | 48.81    | G     | G     | EMS    |
| 0.8                                       | 0.5                | 8/8/1985    | 8/5/1985   | LT05_L1TP_048026_19850805_20161004_01_T1 | 3          | 44.66             | TCF       | CAN     | -124.11   | 48.81    | G     | G     | EMS    |
| 0.7                                       | 0.4                | 10/7/1985   | 10/8/1985  | LT05_L1TP_048026_19851008_20161004_01_T1 | -1         | 11.66             | TCF       | CAN     | -123.83   | 48.96    | G     | G     | EMS    |
| 0.7                                       | 0.3                | 8/16/1994   | 8/18/1994  | LT05_L1TP_044026_19940818_20160927_01_T1 | -2         | 2411.75           | TCF       | CAN     | -118.26   | 49.13    | G     | G     | EMS    |
| 3.8                                       | 0.7                | 10/7/1985   | 10/8/1985  | LT05_L1TP_048026_19851008_20161004_01_T1 | -1         | 45.41             | TCF       | CAN     | -124      | 49.16    | G     | G     | EMS    |
| 1.0                                       | 0.4                | 9/27/2006   | 9/27/2006  | LT05_L1TP_045026_20060927_20160910_01_T1 | 0          | 55.87             | TCF       | CAN     | -118.6    | 49.18    | G     | G     | EMS    |
| 0.6                                       | 0.2                | 8/18/2016   | 8/17/2016  | LC08_L1TP_049025_20160817_20170322_01_T1 | 1          | 3219.44           | TCF       | CAN     | -125.57   | 49.73    | G     | G     | EMS    |
| 0.8                                       | 0.3                | 10/8/2009   | 10/10/2009 | LT05_L1TP_048025_20091010_20161019_01_T1 | -2         | 84.41             | TCF       | CAN     | -122.98   | 50.11    | G     | G     | EMS    |
| 1.5                                       | 0.4                | 9/10/2008   | 9/7/2008   | LT05_L1TP_046024_20080907_20161029_01_T1 | 3          | 1126.69           | TCF       | CAN     | -121.11   | 51.59    | G     | G     | EMS    |
| 1.5                                       | 0.5                | 9/10/2015   | 9/11/2015  | LC08_L1TP_046024_20150911_20170225_01_T1 | -1         | 1118.1            | TCF       | CAN     | -121.11   | 51.59    | G     | G     | EMS    |
| 18.7                                      | 3.9                | 10/3/1989   | 10/3/1989  | LT05_L1TP_048024_19891003_20170201_01_T1 | 0          | 641.32            | TCF       | CAN     | -122.07   | 52.12    | G     | G     | EMS    |
| 1.9                                       | 0.6                | 7/16/1985   | 7/18/1985  | LT05_L1TP_050022_19850718_20170219_01_T1 | -2         | 187.91            | TCF       | CAN     | -126.36   | 54.18    | G     | G     | EMS    |
| 12.8                                      | 3.0                | 8/26/2002   | 8/26/2002  | LE07_L1TP_050022_20020826_20170128_01_T1 | 0          | 564.7             | TCF       | CAN     | -125.75   | 54.21    | G     | G     | EMS    |
| 12.7                                      | 2.0                | 8/26/2002   | 8/26/2002  | LE07_L1TP_050022_20020826_20170128_01_T1 | 0          | 187.7             | TCF       | CAN     | -125.84   | 54.29    | G     | G     | EMS    |
| 16.8                                      | 3.3                | 7/23/2002   | 7/23/2002  | LE07_L1TP_052022_20020723_20170128_01_T1 | 0          | 324.33            | TCF       | CAN     | -127.04   | 54.71    | G     | G     | EMS    |
| 3.6                                       | 1.4                | 7/23/2002   | 7/23/2002  | LE07_L1TP_052022_20020723_20170128_01_T1 | 0          | 58.02             | TCF       | CAN     | -127.16   | 54.74    | G     | G     | EMS    |
| 4.5                                       | 2.2                | 8/28/2013   | 8/26/2013  | LC08_L1TP_193018_20130826_20170502_01_T1 | 2          | 5.34              | TCF       | SWE     | 18.2      | 59.18    | G     | G     | SLU    |
| 2.9                                       | 1.0                | 10/27/2014  | 10/24/2014 | LC08_L1TP_016041_20141024_20170303_01_T1 | 3          | 2055.39           | SHF       | USA     | -80.76    | 27.73    | G     | G     | USGS   |
| 108.5                                     | 7.0                | 10/27/2014  | 10/24/2014 | LC08_L1TP_016041_20141024_20170303_01_T1 | 3          | 308.9             | SHF       | USA     | -82.28    | 28.06    | G     | G     | USGS   |
| 4.8                                       | 2.0                | 10/7/2014   | 10/8/2014  | LC08_L1TP_016040_20141008_20170303_01_T1 | -1         | 292.94            | SHF       | USA     | -81.18    | 28.37    | G     | G     | USGS   |
| 2.41                                      | 1.0                | 10/21/2014  | 10/24/2014 | LC08_L1TP_016040_20141024_20170303_01_T1 | -3         | 1114.79           | SHF       | USA     | -81.26    | 28.83    | G     | G     | USGS   |
| 2.67                                      | 1.0                | 10/28/2008  | 10/29/2008 | LT05_L1TP_042033_20081029_20160907_01_T1 | -1         | 12583.78          | TPD       | USA     | -118.72   | 38.7     | G     | G     | USGS   |
| 5.0                                       | 1.0                | 10/13/1999  | 10/10/1999 | LE07_L1TP_037032_19991010_20161003_01_T1 | 3          | 5742.79           | TPD       | USA     | -111.12   | 40.17    | G     | G     | USGS   |
| 2.6                                       | 1.0                | 7/15/1997   | 7/15/1997  | LT05_L1TP_038032_19970715_20160923_01_T1 | 1          | 5925.21           | TPD       | USA     | -111.12   | 40.17    | G     | G     | USGS   |
| 5.0                                       | 1.0                | 9/29/1999   | 10/2/1999  | LT05_L1TP_037032_19991002_20160919_01_T1 | -3         | 14.76             | TPD       | USA     | -110.89   | 40.7     | G     | G     | USGS   |
| 4.0                                       | 1.0                | 10/6/1999   | 10/6/1999  | LE07_L1TP_025028_19991006_20161003_01_T1 | 0          | 178.52            | TCF       | USA     | -89.5     | 46.06    | G     | G     | USGS   |
| 6.0                                       | 2.0                | 10/6/1999   | 10/6/1999  | LE07_L1TP_025028_19991006_20161003_01_T1 | 0          | 32.84             | TCF       | USA     | -89.52    | 46.06    | G     | G     | USGS   |
| 1.0                                       | 0.5                | 10/8/2009   | 10/10/2009 | LT05_L1TP_048025_20091010_20161019_01_T1 | -2         | 6.2               | TCF       | CAN     | -122.99   | 50.1     | G     | G     | EMS    |
| 3.2                                       | 1.0                | 8/20/2014   | 8/21/2014  | LC08_L1TP_016040_20140821_20170304_01_T1 | -1         | 2913.71           | SHF       | USA     | -81.27    | 28.84    | G     | G     | USGS   |
| 5.0                                       | 9.0                | 7/23/2003   | 7/23/2003  | LT05_L1TP_039034_20030723_20160915_01_T1 | 0          | 25.57             | TPD       | USA     | -114.2    | 38.02    | A     | A     | USGS   |

EMS = The Government of British Columbia (2021) Environmental Monitoring System (EMS) Surface water monitoring. Last accessed 03/11/2021 at URL

<https://www2.gov.bc.ca/gov/content/environment/research-monitoring-reporting/monitoring/environmental-monitoring-system>

USGS = U.S. Geological Survey (2021), Environmental Protection Agency: Storage and Retrieval (STORET). Data available on the World Wide Web (USGS Water Data for the Nation). Last accessed 03/11/2021, at URL <https://www.waterqualitydata.us/portal> AND U.S. Geological Survey (2021), National Water Information System (NWIS). Data available on the World Wide Web (USGS Water Data for the Nation). Last accessed 03/11/2021, at URL <https://www.waterqualitydata.us/portal/>

SLU = Swedish University of Agricultural Sciences (SLU) (2021). Miljödata MVM Environmental Data. Last accessed at 03/11/2021 at URL <http://miljodata.slu.se/mvm>

**Table S2a.** Chl-*a* retrieval algorithm results summary for OWT-A<sub>h</sub> after outlier removal. Parameters displayed are coefficient of determination ( $r^2$ ), p-value (p), root mean square error (RMSE; ( $\mu\text{g L}^{-1}$ )), root mean square log error (RMSLE), normalized root mean square error, mean absolute error (MAE, ( $\mu\text{g L}^{-1}$ )), median absolute percentage error (MAPE %), bias ( $\mu\text{g L}^{-1}$ ), Breusch-Pagan constant variance (CV), and Shapiro-Wilks normality (NM). Filled boxes indicate that the assumptions of linear regressions have been met ( $r^2 \geq 0.05$ , CV and NM  $p \geq 0.05$ ), empty boxes indicate that the assumptions have not been met.

| Algorithm                 | $r^2$ | Adj. $r^2$ | RMSE | RMLSE | NRMSE | MAE  | MAPE | Bias  | p | CV | NM | n  |
|---------------------------|-------|------------|------|-------|-------|------|------|-------|---|----|----|----|
| B                         | 0.09  | -0.09      | NA   | NA    | NA    | NA   | 0.11 | -0.06 | □ | ■  | ■  | 7  |
| G                         | 0.77  | 0.71       | NA   | NA    | NA    | NA   | 0.07 | -0.02 | ■ | ■  | ■  | 6  |
| R                         | 0.80  | 0.76       | NA   | NA    | NA    | NA   | 0.05 | -0.03 | ■ | ■  | ■  | 7  |
| N                         | 0.02  | -0.08      | 2.73 | 0.38  | 0.39  | 2.22 | 1.10 | -1.03 | □ | ■  | ■  | 12 |
| B×G                       | 0.27  | 0.15       | NA   | NA    | NA    | NA   | 0.11 | -0.05 | □ | ■  | ■  | 8  |
| B×R                       | 0.06  | -0.88      | NA   | NA    | NA    | NA   | 0.07 | -0.03 | □ | ■  | ■  | 3  |
| B×N                       | 0.69  | 0.53       | NA   | NA    | NA    | NA   | 0.04 | -0.01 | □ | ■  | ■  | 4  |
| G×R                       | 0.40  | 0.27       | NA   | NA    | NA    | NA   | 0.11 | -0.07 | □ | ■  | □  | 7  |
| G×N                       | 0.07  | -0.06      | NA   | NA    | NA    | NA   | 0.13 | -0.09 | □ | ■  | ■  | 9  |
| R×N                       | 0.59  | 0.51       | NA   | NA    | NA    | NA   | 0.11 | -0.05 | ■ | ■  | ■  | 7  |
| B/G                       | 0.67  | 0.51       | NA   | NA    | NA    | NA   | 0.02 | 0.00  | □ | ■  | ■  | 4  |
| B/R                       | 0.91  | 0.90       | NA   | NA    | NA    | NA   | 0.06 | -0.02 | ■ | ■  | ■  | 9  |
| B/N                       | 0.18  | 0.07       | 0.95 | 0.24  | 0.73  | 0.95 | 1.21 | -0.24 | □ | ■  | ■  | 10 |
| G/B                       | 0.82  | 0.79       | NA   | NA    | NA    | NA   | 0.03 | -0.01 | ■ | ■  | ■  | 7  |
| G/R                       | 0.46  | 0.36       | NA   | NA    | NA    | NA   | 0.10 | -0.04 | □ | ■  | ■  | 7  |
| G/N                       | 0.05  | -0.04      | 2.59 | 0.34  | 0.37  | 2.15 | 1.46 | -0.70 | □ | ■  | □  | 12 |
| R/B                       | 0.40  | 0.25       | NA   | NA    | NA    | NA   | 0.07 | -0.03 | □ | ■  | ■  | 6  |
| R/G                       | 0.47  | 0.36       | NA   | NA    | NA    | NA   | 0.10 | -0.04 | □ | ■  | ■  | 7  |
| R/N                       | 0.00  | -0.16      | NA   | NA    | NA    | NA   | 0.10 | -0.07 | □ | ■  | ■  | 8  |
| N/B                       | 0.87  | 0.81       | NA   | NA    | NA    | NA   | 0.04 | -0.01 | □ | ■  | ■  | 4  |
| N/G                       | 0.10  | 0.01       | 2.68 | 0.37  | 0.39  | 2.19 | 1.53 | -0.60 | □ | ■  | □  | 12 |
| N/R                       | 0.00  | -0.16      | NA   | NA    | NA    | NA   | 0.10 | -0.07 | □ | ■  | ■  | 8  |
| B×G×R <sup>1</sup>        | 0.73  | 0.67       | NA   | NA    | NA    | NA   | 0.08 | -0.02 | ■ | ■  | ■  | 6  |
| B×G×N <sup>1</sup>        | 0.00  | -0.12      | 0.96 | 0.21  | 0.78  | 0.96 | 0.41 | -0.23 | □ | ■  | ■  | 10 |
| B×R×N <sup>1</sup>        | 0.01  | -0.13      | NA   | NA    | NA    | NA   | 0.44 | -0.24 | □ | ■  | ■  | 9  |
| G×R×N <sup>1</sup>        | 0.56  | 0.47       | NA   | NA    | NA    | NA   | 0.08 | -0.05 | □ | ■  | ■  | 7  |
| Avg(B;G) <sup>1,2</sup>   | 0.29  | 0.17       | NA   | NA    | NA    | NA   | 0.11 | -0.05 | □ | ■  | ■  | 8  |
| Avg(B;R) <sup>1,2</sup>   | 0.29  | 0.18       | NA   | NA    | NA    | NA   | 0.11 | -0.05 | □ | ■  | ■  | 8  |
| Avg(B;N) <sup>1,2</sup>   | 0.03  | -0.22      | NA   | NA    | NA    | NA   | 0.06 | -0.02 | □ | ■  | ■  | 6  |
| Avg(G;R) <sup>1,2</sup>   | 0.17  | -0.25      | NA   | NA    | NA    | NA   | 0.05 | -0.02 | □ | ■  | ■  | 4  |
| Avg(G;N) <sup>1,2</sup>   | 0.80  | 0.75       | NA   | NA    | NA    | NA   | 0.07 | -0.02 | ■ | ■  | ■  | 6  |
| Avg(R;N) <sup>1,2</sup>   | 0.40  | 0.20       | NA   | NA    | NA    | NA   | 0.05 | -0.03 | □ | ■  | ■  | 5  |
| N-R <sup>3,4</sup>        | 0.75  | 0.67       | NA   | NA    | NA    | NA   | 0.04 | -0.01 | □ | ■  | ■  | 5  |
| Kab1 <sup>5,6</sup>       | 0.66  | 0.57       | NA   | NA    | NA    | NA   | 0.03 | -0.01 | □ | ■  | ■  | 6  |
| NDVI                      | 0.00  | -0.16      | NA   | NA    | NA    | NA   | 0.10 | -0.07 | □ | ■  | ■  | 8  |
| NRVI                      | 0.00  | -0.16      | NA   | NA    | NA    | NA   | 0.10 | -0.07 | □ | ■  | ■  | 8  |
| OC2 <sup>7</sup>          | 0.82  | 0.79       | NA   | NA    | NA    | NA   | 0.03 | -0.01 | ■ | ■  | ■  | 7  |
| SAB1 <sup>5,8</sup>       | 0.19  | 0.02       | NA   | NA    | NA    | NA   | 0.11 | -0.06 | □ | ■  | ■  | 7  |
| (B-R)/G <sup>4,9</sup>    | 0.39  | 0.33       | 0.87 | 0.21  | 0.61  | 0.86 | 1.26 | -0.28 | ■ | ■  | □  | 11 |
| (N/G)+(N/B) <sup>10</sup> | 0.41  | 0.34       | 0.76 | 0.20  | 0.59  | 0.76 | 1.07 | -0.16 | ■ | ■  | ■  | 10 |
| G×(B+G+R)                 | 1.00  | 1.00       | NA   | NA    | NA    | NA   | 0.01 | 0.00  | ■ | ■  | ■  | 4  |

| Algorithm                              | r <sup>2</sup> | Adj. r <sup>2</sup> | RMSE | RMLSE | NRMSE | MAE  | MAPE | Bias  | p | CV | NM | n  |
|----------------------------------------|----------------|---------------------|------|-------|-------|------|------|-------|---|----|----|----|
| [(1/B)-(1/G)]×N <sup>10</sup>          | 0.80           | 0.74                | NA   | NA    | NA    | NA   | 0.02 | 0.00  | ■ | ■  | ■  | 5  |
| [(1/R)-(1/G)]×N <sup>10</sup>          | 0.81           | 0.77                | NA   | NA    | NA    | NA   | 0.05 | -0.02 | ■ | ■  | ■  | 7  |
| [(1/R)-(1/B)]×N <sup>10</sup>          | 0.89           | 0.83                | NA   | NA    | NA    | NA   | 0.03 | 0.00  | □ | ■  | ■  | 4  |
| [(1/R)-(0.2363×(1/G))]×N <sup>11</sup> | 0.42           | 0.22                | NA   | NA    | NA    | NA   | 0.06 | -0.03 | □ | ■  | ■  | 5  |
| [(1/R)-(1/B)]/N <sup>12</sup>          | 0.63           | 0.54                | NA   | NA    | NA    | NA   | 0.06 | -0.02 | □ | ■  | ■  | 6  |
| (B/R)×N                                | 0.60           | 0.46                | NA   | NA    | NA    | NA   | 0.04 | -0.01 | □ | ■  | ■  | 5  |
| (G/R)×N                                | 0.01           | -0.24               | NA   | NA    | NA    | NA   | 0.10 | -0.05 | □ | ■  | ■  | 6  |
| (R/B)×N                                | 0.53           | 0.41                | NA   | NA    | NA    | NA   | 0.11 | -0.04 | □ | ■  | ■  | 6  |
| (R/G)×N                                | 0.06           | -0.05               | 0.89 | 0.20  | 0.72  | 0.89 | 0.41 | -0.21 | □ | ■  | □  | 10 |
| (R×N)/B <sup>13</sup>                  | 0.53           | 0.41                | NA   | NA    | NA    | NA   | 0.11 | -0.04 | □ | ■  | ■  | 6  |
| (B/G)×(B/R)                            | 0.07           | -0.11               | NA   | NA    | NA    | NA   | 0.07 | -0.04 | □ | ■  | ■  | 7  |
| (B/G)×(B/N)                            | 0.23           | 0.14                | 0.95 | 0.22  | 0.67  | 0.94 | 0.81 | -0.43 | □ | ■  | □  | 11 |
| (B/G)×(R/G)                            | 0.05           | -0.09               | NA   | NA    | NA    | NA   | 1.49 | -0.28 | □ | ■  | □  | 9  |
| (B/G)×(R/N)                            | 0.22           | 0.09                | NA   | NA    | NA    | NA   | 0.11 | -0.05 | □ | ■  | ■  | 8  |
| (B/G)×(N/B)                            | 0.10           | 0.01                | 3.43 | 0.43  | 0.49  | 3.41 | 1.57 | -1.90 | □ | ■  | □  | 12 |
| (B/G)×(N/G)                            | 0.38           | 0.31                | 0.85 | 0.20  | 0.60  | 0.81 | 0.72 | -0.33 | ■ | ■  | ■  | 11 |
| (B/G)×(N/R)                            | 0.03           | -0.13               | NA   | NA    | NA    | NA   | 0.10 | -0.07 | □ | ■  | ■  | 8  |
| (B/R)×(B/N)                            | 0.38           | 0.31                | 0.82 | 0.21  | 0.58  | 0.81 | 1.29 | -0.13 | ■ | ■  | □  | 11 |
| (B/R)×(G/R)                            | 0.07           | -0.39               | NA   | NA    | NA    | NA   | 0.04 | -0.01 | □ | ■  | ■  | 4  |
| (B/R)×(G/N)                            | 0.00           | -0.12               | 1.11 | 0.28  | 0.85  | 1.11 | 1.44 | -0.31 | □ | ■  | □  | 10 |
| (B/R)×(N/R)                            | 0.34           | 0.22                | NA   | NA    | NA    | NA   | 0.10 | -0.05 | □ | ■  | ■  | 8  |
| (B/N)×(G/N)                            | 0.34           | 0.26                | 0.86 | 0.22  | 0.66  | 0.86 | 1.10 | -0.18 | □ | ■  | ■  | 10 |
| (B/N)×(R/N)                            | 0.21           | 0.12                | 1.01 | 0.24  | 0.71  | 1.00 | 1.23 | -0.27 | □ | ■  | ■  | 11 |
| (G/B)×(G/R)                            | 0.12           | -0.10               | NA   | NA    | NA    | NA   | 0.05 | -0.02 | □ | ■  | ■  | 6  |
| (G/B)×(G/N)                            | 0.16           | 0.08                | 3.51 | 0.43  | 0.50  | 3.50 | 1.36 | -1.92 | □ | ■  | □  | 12 |
| (G/B)×(R/B)                            | 0.07           | -0.11               | NA   | NA    | NA    | NA   | 0.07 | -0.04 | □ | ■  | ■  | 7  |
| (G/B)×(R/N)                            | 0.03           | -0.14               | NA   | NA    | NA    | NA   | 0.10 | -0.07 | □ | ■  | ■  | 8  |
| (G/B)×(N/B)                            | 0.09           | -0.02               | 1.08 | 0.27  | 0.83  | 1.08 | 1.44 | -0.28 | □ | ■  | □  | 10 |
| (G/B)×(N/R)                            | 0.26           | 0.13                | NA   | NA    | NA    | NA   | 0.11 | -0.05 | □ | ■  | ■  | 8  |
| (G/R)×(G/N)                            | 0.02           | -0.07               | 2.59 | 0.37  | 0.37  | 2.21 | 1.69 | -0.65 | □ | ■  | ■  | 12 |
| (G/R)×(N/R)                            | 0.60           | 0.54                | NA   | NA    | NA    | NA   | 0.08 | -0.04 | ■ | ■  | ■  | 9  |
| (G/N)×(R/N)                            | 0.05           | -0.13               | NA   | NA    | NA    | NA   | 0.09 | -0.04 | □ | ■  | ■  | 7  |
| (R/B)×(R/G)                            | 0.06           | -0.41               | NA   | NA    | NA    | NA   | 0.04 | -0.01 | □ | ■  | ■  | 4  |
| (R/B)×(R/N)                            | 0.45           | 0.34                | NA   | NA    | NA    | NA   | 0.09 | -0.04 | □ | ■  | ■  | 7  |
| (R/B)×(N/B)                            | 0.26           | 0.17                | 0.94 | 0.24  | 0.73  | 0.94 | 1.30 | -0.22 | □ | ■  | ■  | 10 |
| (R/B)×(N/G)                            | 0.00           | -0.12               | 1.12 | 0.28  | 0.86  | 1.12 | 1.45 | -0.31 | □ | ■  | □  | 10 |
| (R/G)×(R/N)                            | 0.79           | 0.75                | NA   | NA    | NA    | NA   | 0.08 | -0.03 | ■ | ■  | ■  | 7  |
| (R/G)×(N/G)                            | 0.11           | 0.01                | 3.28 | 0.41  | 0.45  | 3.28 | 1.56 | -1.84 | □ | ■  | □  | 11 |
| (N/B)×(N/G)                            | 0.00           | -0.10               | 3.33 | 0.41  | 0.48  | 3.28 | 1.10 | -2.17 | □ | ■  | ■  | 12 |
| (N/B)×(N/R)                            | 0.15           | -0.28               | NA   | NA    | NA    | NA   | 0.05 | -0.01 | □ | ■  | ■  | 4  |
| (N/G)×(N/R)                            | 0.17           | 0.09                | 3.30 | 0.39  | 0.48  | 3.30 | 1.40 | -1.93 | □ | ■  | □  | 12 |

(1) Fadel et al., 2016; (2) Patra et al., 2015; (3) Tucker, 1979; (4) Ho et al., 2017; (5) Boucher et al., 2018; (6) Kabbara et al., 2008; (7) Trinh et al., 2017; (8) Alawadi et al., 2010; (9) Mayo et al., 1995; (10) Keith et al., 2018; (11) Chenet et al., 2013; (12) Singh et al., 2014; (13) Guan, 2009.

Kab1 = 1.67-3.94×ln(B)+3.78×ln(G)

NDVI = (N-R)/(N+R)

NRVI = [(R/NIR)-1]/[(R/NIR)+1]

SABI = (N-R)/(B+G)

**OC2 = 0.1977+(-1.8117(log10(BG)))1+(1.9743(log10(BG)))2+(2.5635(log10(BG)))3+(-0.7218(log10(BG)))4**

**Table S2b.** Chl-*a* retrieval algorithm results summary for OWT-B<sub>h</sub> after outlier removal. Parameters displayed are coefficient of determination ( $r^2$ ), p-value (p), root mean square error (RMSE; ( $\mu\text{g L}^{-1}$ )), root mean square log error (RMSLE), normalized root mean square error, mean absolute error (MAE, ( $\mu\text{g L}^{-1}$ )), median absolute percentage error (MAPE %), bias ( $\mu\text{g L}^{-1}$ ), Breusch-Pagan constant variance (CV), and Shapiro-Wilks normality (NM). Filled boxes indicate that the assumptions of linear regressions have been met ( $r^2 \geq 0.05$ , CV and NM  $p \geq 0.05$ ), empty boxes indicate that the assumptions have not been met.

| Algorithm                 | $r^2$ | Adj. $r^2$ | RMSE  | RMLSE | NRMSE | MAE   | MAPE | Bias   | p | CV | NM | n  |
|---------------------------|-------|------------|-------|-------|-------|-------|------|--------|---|----|----|----|
| B                         | 0.05  | 0.02       | 21.10 | 0.68  | 0.91  | 18.72 | 0.18 | -7.75  | □ | ■  | □  | 30 |
| G                         | 0.11  | 0.08       | 23.75 | 0.77  | 0.99  | 18.84 | 0.20 | -6.45  | □ | □  | ■  | 32 |
| R                         | 0.05  | 0.02       | 22.29 | 0.78  | 0.93  | 18.43 | 0.29 | -7.49  | □ | ■  | ■  | 32 |
| N                         | 0.07  | 0.04       | 26.01 | 0.70  | 0.79  | 20.46 | 0.24 | -8.98  | □ | ■  | ■  | 31 |
| B×G                       | 0.01  | -0.02      | 22.55 | 0.79  | 0.98  | 18.94 | 0.21 | -9.39  | □ | ■  | □  | 31 |
| B×R                       | 0.01  | -0.03      | 23.28 | 0.70  | 1.00  | 18.79 | 0.18 | -8.20  | □ | ■  | □  | 30 |
| B×N                       | 0.07  | 0.03       | 21.09 | 0.61  | 0.92  | 17.88 | 0.13 | -6.18  | □ | ■  | ■  | 29 |
| G×R                       | 0.08  | 0.05       | 21.62 | 0.77  | 0.89  | 18.62 | 0.26 | -7.45  | □ | ■  | ■  | 31 |
| G×N                       | 0.02  | -0.02      | 22.85 | 0.78  | 0.94  | 19.64 | 0.17 | -8.38  | □ | ■  | □  | 31 |
| R×N                       | 0.04  | 0.01       | 21.09 | 0.73  | 0.91  | 17.90 | 0.18 | -8.09  | □ | ■  | □  | 29 |
| B/G                       | 0.82  | 0.81       | 11.74 | 0.31  | 0.55  | 10.16 | 0.09 | -2.27  | ■ | ■  | ■  | 23 |
| B/R                       | 0.09  | 0.05       | 22.43 | 0.46  | 0.70  | 18.24 | 0.11 | -6.69  | □ | ■  | ■  | 26 |
| B/N                       | 0.03  | -0.01      | 26.06 | 0.74  | 0.79  | 21.20 | 0.19 | -8.24  | □ | ■  | ■  | 31 |
| G/B                       | 0.00  | -0.04      | 23.08 | 0.43  | 0.71  | 19.61 | 0.11 | -7.82  | □ | ■  | ■  | 25 |
| G/R                       | 0.14  | 0.10       | 23.10 | 0.45  | 0.70  | 18.10 | 0.10 | -7.66  | □ | ■  | ■  | 24 |
| G/N                       | 0.27  | 0.25       | 26.29 | 0.73  | 0.78  | 22.00 | 0.19 | -6.83  | ■ | ■  | ■  | 31 |
| R/B                       | 0.20  | 0.17       | 28.19 | 0.78  | 0.84  | 21.84 | 0.19 | -9.02  | ■ | □  | ■  | 33 |
| R/G                       | 0.15  | 0.11       | 23.50 | 0.44  | 0.71  | 19.76 | 0.11 | -4.06  | □ | ■  | ■  | 24 |
| R/N                       | 0.20  | 0.18       | 26.85 | 0.75  | 0.79  | 21.77 | 0.17 | -9.81  | ■ | ■  | ■  | 32 |
| N/B                       | 0.03  | -0.01      | 28.30 | 0.80  | 0.86  | 21.88 | 0.17 | -11.65 | □ | ■  | ■  | 31 |
| N/G                       | 0.34  | 0.32       | 26.65 | 0.69  | 0.79  | 22.07 | 0.18 | -8.17  | ■ | ■  | ■  | 30 |
| N/R                       | 0.12  | 0.06       | 14.02 | 0.35  | 0.81  | 13.00 | 0.09 | -1.91  | □ | ■  | ■  | 19 |
| B×G×R <sup>1</sup>        | 0.01  | -0.02      | 20.77 | 0.71  | 0.86  | 18.91 | 0.24 | -10.24 | □ | ■  | □  | 32 |
| B×G×N <sup>1</sup>        | 0.07  | 0.03       | 21.19 | 0.58  | 0.90  | 18.63 | 0.18 | -5.07  | □ | ■  | ■  | 25 |
| B×R×N <sup>1</sup>        | 0.04  | 0.00       | 21.29 | 0.58  | 0.94  | 18.97 | 0.16 | -7.91  | □ | ■  | ■  | 27 |
| G×R×N <sup>1</sup>        | 0.00  | -0.03      | 24.32 | 0.80  | 1.01  | 20.48 | 0.21 | -11.24 | □ | ■  | □  | 32 |
| Avg(B;G) <sup>1,2</sup>   | 0.02  | -0.01      | 19.36 | 0.54  | 0.91  | 16.21 | 0.11 | -6.86  | □ | ■  | ■  | 27 |
| Avg(B;R) <sup>1,2</sup>   | 0.00  | -0.03      | 22.25 | 0.68  | 0.95  | 19.05 | 0.13 | -8.25  | □ | ■  | □  | 30 |
| Avg(B;N) <sup>1,2</sup>   | 0.07  | 0.03       | 21.28 | 0.63  | 0.93  | 18.84 | 0.14 | -7.36  | □ | ■  | ■  | 29 |
| Avg(G;R) <sup>1,2</sup>   | 0.09  | 0.06       | 21.90 | 0.73  | 0.91  | 18.80 | 0.20 | -11.80 | □ | ■  | ■  | 32 |
| Avg(G;N) <sup>1,2</sup>   | 0.01  | -0.03      | 23.04 | 0.78  | 0.97  | 19.88 | 0.16 | -12.28 | □ | ■  | □  | 31 |
| Avg(R;N) <sup>1,2</sup>   | 0.02  | -0.01      | 22.32 | 0.78  | 0.93  | 19.60 | 0.25 | -11.47 | □ | ■  | □  | 32 |
| N-R <sup>3,4</sup>        | 0.20  | 0.17       | 26.34 | 0.76  | 0.79  | 20.67 | 0.22 | -9.04  | ■ | ■  | ■  | 33 |
| KabI <sup>5,6</sup>       | 0.00  | -0.04      | 23.67 | 0.45  | 0.73  | 19.91 | 0.12 | -5.00  | □ | ■  | ■  | 25 |
| NDVI                      | 0.19  | 0.17       | 27.42 | 0.73  | 0.82  | 20.74 | 0.14 | -7.05  | ■ | ■  | ■  | 33 |
| NRVI                      | 0.19  | 0.17       | 27.69 | 0.77  | 0.83  | 22.31 | 0.16 | -10.93 | ■ | ■  | ■  | 33 |
| OC2 <sup>7</sup>          | 0.07  | 0.03       | 23.80 | 0.49  | 0.74  | 19.99 | 0.12 | -5.84  | □ | ■  | ■  | 27 |
| SABl <sup>5,8</sup>       | 0.24  | 0.22       | 24.70 | 0.72  | 0.75  | 19.49 | 0.19 | -9.28  | ■ | ■  | ■  | 32 |
| (B-R)/G <sup>4,9</sup>    | 0.52  | 0.49       | 12.25 | 0.29  | 0.65  | 11.15 | 0.08 | -2.20  | ■ | ■  | ■  | 20 |
| (N/G)+(N/B) <sup>10</sup> | 0.19  | 0.16       | 25.01 | 0.74  | 0.75  | 20.36 | 0.23 | -7.02  | ■ | ■  | ■  | 32 |
| G×(B+G+R)                 | 0.06  | 0.03       | 22.42 | 0.78  | 0.93  | 19.42 | 0.28 | -11.60 | □ | ■  | ■  | 32 |



| Algorithm                              | r <sup>2</sup> | Adj. r <sup>2</sup> | RMSE  | RMLSE | NRMSE | MAE   | MAPE | Bias   | p | CV | NM | n  |
|----------------------------------------|----------------|---------------------|-------|-------|-------|-------|------|--------|---|----|----|----|
| [(1/B)-(1/G)]×N <sup>10</sup>          | 0.01           | -0.04               | 25.90 | 0.49  | 0.80  | 21.38 | 0.12 | -8.02  | □ | ■  | ■  | 25 |
| [(1/R)-(1/G)]×N <sup>10</sup>          | 0.01           | -0.02               | 26.26 | 0.78  | 0.80  | 21.30 | 0.19 | -12.45 | □ | ■  | ■  | 31 |
| [(1/R)-(1/B)]×N <sup>10</sup>          | 0.28           | 0.25                | 15.20 | 0.38  | 0.78  | 12.69 | 0.09 | -2.93  | ■ | ■  | ■  | 25 |
| [(1/R)-(0.2363×(1/G))]×N <sup>11</sup> | 0.19           | 0.16                | 23.99 | 0.73  | 0.72  | 20.35 | 0.17 | -10.12 | ■ | ■  | ■  | 33 |
| [(1/R)-(1/B)]/N <sup>12</sup>          | 0.06           | 0.03                | 25.73 | 0.76  | 0.77  | 21.11 | 0.24 | -10.00 | □ | ■  | ■  | 33 |
| (B/R)×N                                | 0.01           | -0.04               | 15.51 | 0.41  | 0.80  | 13.99 | 0.11 | -1.88  | □ | ■  | ■  | 23 |
| (G/R)×N                                | 0.03           | 0.00                | 28.30 | 0.80  | 0.85  | 22.44 | 0.21 | -10.80 | □ | ■  | ■  | 33 |
| (R/B)×N                                | 0.00           | -0.03               | 28.87 | 0.87  | 0.87  | 22.86 | 0.17 | -11.50 | □ | ■  | ■  | 32 |
| (R/G)×N                                | 0.07           | 0.04                | 26.56 | 0.62  | 0.81  | 20.94 | 0.18 | -8.99  | □ | ■  | ■  | 29 |
| (R×N)/B <sup>13</sup>                  | 0.00           | -0.03               | 26.70 | 0.84  | 0.81  | 23.10 | 0.20 | -12.49 | □ | ■  | ■  | 32 |
| (B/G)×(B/R)                            | 0.00           | -0.04               | 24.57 | 0.48  | 0.76  | 19.78 | 0.10 | -9.17  | □ | ■  | ■  | 25 |
| (B/G)×(B/N)                            | 0.01           | -0.02               | 25.69 | 0.66  | 0.78  | 21.22 | 0.13 | -9.71  | □ | ■  | ■  | 29 |
| (B/G)×(R/G)                            | 0.06           | 0.02                | 25.95 | 0.58  | 0.80  | 20.70 | 0.15 | -6.07  | □ | ■  | ■  | 28 |
| (B/G)×(R/N)                            | 0.01           | -0.03               | 27.75 | 0.79  | 0.84  | 22.62 | 0.19 | -12.52 | □ | ■  | ■  | 32 |
| (B/G)×(N/B)                            | 0.34           | 0.32                | 28.27 | 0.71  | 0.84  | 22.07 | 0.18 | -8.17  | ■ | ■  | ■  | 30 |
| (B/G)×(N/G)                            | 0.09           | 0.05                | 15.81 | 0.33  | 0.81  | 14.06 | 0.08 | -2.39  | □ | ■  | ■  | 22 |
| (B/G)×(N/R)                            | 0.00           | -0.05               | 14.87 | 0.32  | 0.84  | 13.39 | 0.08 | -2.54  | □ | ■  | ■  | 21 |
| (B/R)×(B/N)                            | 0.02           | -0.02               | 28.38 | 0.82  | 0.86  | 22.49 | 0.15 | -13.88 | □ | ■  | ■  | 31 |
| (B/R)×(G/R)                            | 0.03           | 0.00                | 26.81 | 0.76  | 0.80  | 22.15 | 0.15 | -9.29  | □ | ■  | ■  | 32 |
| (B/R)×(G/N)                            | 0.06           | 0.03                | 27.38 | 0.75  | 0.83  | 20.99 | 0.15 | -15.43 | □ | ■  | ■  | 31 |
| (B/R)×(N/R)                            | 0.52           | 0.51                | 25.99 | 0.55  | 0.78  | 20.92 | 0.16 | -4.05  | ■ | ■  | ■  | 29 |
| (B/N)×(G/N)                            | 0.16           | 0.13                | 28.83 | 0.81  | 0.87  | 22.13 | 0.15 | -9.63  | ■ | ■  | ■  | 32 |
| (B/N)×(R/N)                            | 0.14           | 0.11                | 27.51 | 0.77  | 0.83  | 21.15 | 0.20 | -7.85  | ■ | ■  | ■  | 32 |
| (G/B)×(G/R)                            | 0.06           | 0.02                | 23.06 | 0.55  | 0.71  | 20.86 | 0.15 | -7.22  | □ | ■  | ■  | 28 |
| (G/B)×(G/N)                            | 0.28           | 0.25                | 29.41 | 0.77  | 0.87  | 22.32 | 0.16 | -8.36  | ■ | □  | ■  | 32 |
| (G/B)×(R/B)                            | 0.07           | 0.03                | 24.62 | 0.50  | 0.76  | 20.20 | 0.12 | -8.54  | □ | ■  | ■  | 27 |
| (G/B)×(R/N)                            | 0.32           | 0.29                | 29.89 | 0.74  | 0.87  | 22.49 | 0.18 | -5.76  | ■ | ■  | ■  | 31 |
| (G/B)×(N/B)                            | 0.00           | -0.04               | 26.76 | 0.66  | 0.82  | 21.49 | 0.15 | -10.02 | □ | ■  | ■  | 29 |
| (G/B)×(N/R)                            | 0.01           | -0.02               | 28.58 | 0.83  | 0.86  | 22.48 | 0.26 | -16.89 | □ | ■  | ■  | 32 |
| (G/R)×(G/N)                            | 0.27           | 0.24                | 27.70 | 0.71  | 0.82  | 21.42 | 0.23 | -8.64  | ■ | ■  | ■  | 31 |
| (G/R)×(N/R)                            | 0.19           | 0.16                | 25.43 | 0.75  | 0.78  | 19.74 | 0.13 | -7.50  | ■ | ■  | ■  | 32 |
| (G/N)×(R/N)                            | 0.28           | 0.25                | 27.40 | 0.71  | 0.80  | 22.39 | 0.18 | -8.62  | ■ | ■  | ■  | 30 |
| (R/B)×(R/G)                            | 0.00           | -0.04               | 26.87 | 0.78  | 0.81  | 21.94 | 0.24 | -11.20 | □ | ■  | ■  | 30 |
| (R/B)×(R/N)                            | 0.77           | 0.76                | 18.02 | 0.42  | 0.46  | 15.33 | 0.15 | -3.27  | ■ | ■  | ■  | 21 |
| (R/B)×(N/B)                            | 0.00           | -0.03               | 26.56 | 0.86  | 0.80  | 22.43 | 0.19 | -11.89 | □ | ■  | ■  | 32 |
| (R/B)×(N/G)                            | 0.05           | 0.02                | 26.95 | 0.79  | 0.81  | 21.10 | 0.13 | -13.48 | □ | ■  | ■  | 31 |
| (R/G)×(R/N)                            | 0.15           | 0.12                | 27.70 | 0.80  | 0.82  | 21.32 | 0.21 | -8.16  | ■ | ■  | ■  | 32 |
| (R/G)×(N/G)                            | 0.38           | 0.36                | 25.35 | 0.62  | 0.74  | 21.04 | 0.17 | -6.87  | ■ | ■  | ■  | 28 |
| (N/B)×(N/G)                            | 0.11           | 0.08                | 26.78 | 0.74  | 0.80  | 21.05 | 0.17 | -10.55 | □ | ■  | ■  | 30 |
| (N/B)×(N/R)                            | 0.09           | 0.06                | 24.73 | 0.75  | 0.75  | 19.62 | 0.17 | -8.41  | □ | ■  | ■  | 31 |
| (N/G)×(N/R)                            | 0.00           | -0.06               | 13.75 | 0.32  | 0.84  | 12.09 | 0.08 | -2.76  | □ | ■  | ■  | 20 |

(1) Fadel et al., 2016; (2) Patra et al., 2015; (3) Tucker, 1979; (4) Ho et al., 2017; (5) Boucher et al., 2018; (6) Kabbara et al., 2008; (7) Trinh et al., 2017; (8) Alawadi et al., 2010; (9) Mayo et al., 1995; (10) Keith et al., 2018; (11) Chenet et al., 2013; (12) Singh et al., 2014; (13) Guan, 2009.

Kab1 = 1.67-3.94×ln(B)+3.78×ln(G)

NDVI = (N-R)/(N+R)

NRVI = [(R/NIR)-1]/[(R/NIR)+1]

SABI = (N-R)/(B+G)

**OC2=0.1977+(-1.8117(log10(BG)))1+(1.9743(log10(BG)))2+(2.5635(log10(BG)))3+(-0.7218(log10(BG)))4**

**Table S2c.** Chl-*a* retrieval algorithm results summary for OWT-C<sub>h</sub> after outlier removal. Parameters displayed are coefficient of determination ( $r^2$ ), p-value (p), root mean square error (RMSE; ( $\mu\text{g L}^{-1}$ )), root mean square log error (RMSLE), normalized root mean square error, mean absolute error (MAE, ( $\mu\text{g L}^{-1}$ )), median absolute percentage error (MAPE %), bias ( $\mu\text{g L}^{-1}$ ), Breusch-Pagan constant variance (CV), and Shapiro-Wilks normality (NM). Filled boxes indicate that the assumptions of linear regressions have been met ( $r^2 \geq 0.05$ , CV and NM  $p \geq 0.05$ ), empty boxes indicate that the assumptions have not been met.

| Algorithm                 | $r^2$ | Adj. $r^2$ | RMSE  | RMLSE | NRMSE | MAE   | MAPE | Bias   | p | CV | NM | n  |
|---------------------------|-------|------------|-------|-------|-------|-------|------|--------|---|----|----|----|
| B                         | 0.01  | -0.05      | 24.07 | 0.69  | 0.85  | 22.92 | 0.22 | -11.95 | □ | ■  | ■  | 18 |
| G                         | 0.00  | -0.07      | 20.91 | 0.67  | 0.83  | 19.26 | 0.22 | -9.01  | □ | ■  | ■  | 17 |
| R                         | 0.00  | -0.06      | 24.67 | 0.71  | 0.87  | 21.90 | 0.22 | -11.33 | □ | ■  | ■  | 18 |
| N                         | 0.00  | -0.06      | 23.37 | 0.78  | 0.82  | 19.68 | 0.52 | -9.90  | □ | ■  | ■  | 19 |
| B×G                       | 0.08  | 0.02       | 20.06 | 0.58  | 0.69  | 17.31 | 0.20 | -6.64  | □ | ■  | ■  | 16 |
| B×R                       | 0.06  | 0.00       | 20.38 | 0.62  | 0.70  | 18.80 | 0.21 | -7.03  | □ | ■  | ■  | 16 |
| B×N                       | 0.05  | -0.01      | 23.37 | 0.69  | 0.81  | 20.61 | 0.22 | -9.11  | □ | ■  | ■  | 17 |
| G×R                       | 0.06  | -0.02      | 16.81 | 0.53  | 0.65  | 15.31 | 0.19 | -4.83  | □ | ■  | ■  | 15 |
| G×N                       | 0.07  | 0.00       | 20.67 | 0.63  | 0.72  | 19.83 | 0.21 | -9.38  | □ | ■  | ■  | 17 |
| R×N                       | 0.02  | -0.05      | 22.00 | 0.69  | 0.76  | 19.95 | 0.24 | -5.80  | □ | ■  | ■  | 17 |
| B/G                       | 0.16  | 0.09       | 17.26 | 0.59  | 0.65  | 15.40 | 0.21 | -5.08  | □ | ■  | ■  | 15 |
| B/R                       | 0.01  | -0.05      | 24.29 | 0.70  | 0.86  | 22.09 | 0.22 | -10.45 | □ | ■  | ■  | 18 |
| B/N                       | 0.00  | -0.07      | 24.84 | 0.72  | 0.86  | 23.27 | 0.25 | -9.66  | □ | ■  | ■  | 17 |
| G/B                       | 0.16  | 0.10       | 17.45 | 0.54  | 0.66  | 15.97 | 0.18 | -6.91  | □ | ■  | ■  | 15 |
| G/R                       | 0.15  | 0.10       | 21.41 | 0.60  | 0.75  | 19.68 | 0.20 | -8.11  | □ | ■  | ■  | 17 |
| G/N                       | 0.00  | -0.07      | 23.09 | 0.69  | 0.90  | 22.56 | 0.21 | -13.98 | □ | ■  | ■  | 16 |
| R/B                       | 0.01  | -0.06      | 20.42 | 0.67  | 0.72  | 19.91 | 0.23 | -6.98  | □ | ■  | ■  | 18 |
| R/G                       | 0.07  | 0.01       | 20.49 | 0.63  | 0.72  | 18.67 | 0.22 | -6.61  | □ | □  | ■  | 18 |
| R/N                       | 0.08  | 0.02       | 21.38 | 0.65  | 0.74  | 18.68 | 0.22 | -4.49  | □ | ■  | ■  | 16 |
| N/B                       | 0.01  | -0.06      | 24.10 | 0.68  | 0.85  | 22.17 | 0.22 | -11.29 | □ | ■  | ■  | 18 |
| N/G                       | 0.05  | -0.02      | 22.09 | 0.62  | 0.77  | 20.08 | 0.20 | -10.37 | □ | ■  | ■  | 17 |
| N/R                       | 0.00  | -0.06      | 22.09 | 0.68  | 0.78  | 19.44 | 0.21 | -7.31  | □ | ■  | ■  | 18 |
| B×G×R <sup>1</sup>        | 0.11  | 0.05       | 22.17 | 0.60  | 0.76  | 20.72 | 0.19 | -11.45 | □ | ■  | ■  | 16 |
| B×G×N <sup>1</sup>        | 0.02  | -0.04      | 23.39 | 0.65  | 0.81  | 20.85 | 0.21 | -10.65 | □ | □  | ■  | 17 |
| B×R×N <sup>1</sup>        | 0.14  | 0.07       | 18.42 | 0.49  | 0.63  | 16.14 | 0.17 | -4.81  | □ | ■  | ■  | 15 |
| G×R×N <sup>1</sup>        | 0.16  | 0.10       | 19.55 | 0.55  | 0.67  | 18.93 | 0.18 | -10.31 | □ | ■  | ■  | 16 |
| Avg(B;G) <sup>1,2</sup>   | 0.02  | -0.04      | 24.60 | 0.72  | 0.85  | 21.29 | 0.23 | -9.97  | □ | □  | ■  | 17 |
| Avg(B;R) <sup>1,2</sup>   | 0.00  | -0.06      | 20.83 | 0.64  | 0.74  | 19.62 | 0.21 | -7.94  | □ | ■  | ■  | 18 |
| Avg(B;N) <sup>1,2</sup>   | 0.06  | -0.01      | 22.51 | 0.63  | 0.78  | 19.90 | 0.21 | -8.47  | □ | ■  | ■  | 17 |
| Avg(G;R) <sup>1,2</sup>   | 0.06  | -0.02      | 18.07 | 0.52  | 0.70  | 17.08 | 0.18 | -8.43  | □ | ■  | ■  | 15 |
| Avg(G;N) <sup>1,2</sup>   | 0.06  | 0.00       | 23.23 | 0.65  | 0.81  | 21.44 | 0.21 | -11.78 | □ | ■  | ■  | 17 |
| Avg(R;N) <sup>1,2</sup>   | 0.01  | -0.05      | 25.65 | 0.74  | 0.89  | 23.23 | 0.23 | -11.91 | □ | ■  | ■  | 17 |
| N-R <sup>3,4</sup>        | 0.00  | -0.06      | 24.62 | 0.69  | 0.87  | 22.72 | 0.22 | -12.13 | □ | ■  | ■  | 18 |
| KabI <sup>5,6</sup>       | 0.17  | 0.11       | 20.05 | 0.61  | 0.76  | 19.50 | 0.19 | -10.37 | □ | ■  | ■  | 15 |
| NDVI                      | 0.09  | 0.02       | 24.73 | 0.65  | 0.85  | 22.89 | 0.19 | -12.11 | □ | ■  | ■  | 16 |
| NRVI                      | 0.09  | 0.02       | 21.49 | 0.61  | 0.74  | 20.08 | 0.20 | -8.98  | □ | ■  | ■  | 16 |
| OC2 <sup>7</sup>          | 0.16  | 0.10       | 20.07 | 0.60  | 0.76  | 19.73 | 0.19 | -11.24 | □ | ■  | ■  | 15 |
| SABl <sup>5,8</sup>       | 0.08  | 0.01       | 18.68 | 0.57  | 0.64  | 17.81 | 0.20 | -6.19  | □ | ■  | ■  | 16 |
| (B-R)/G <sup>4,9</sup>    | 0.17  | 0.11       | 17.59 | 0.59  | 0.66  | 15.95 | 0.20 | -5.03  | □ | ■  | ■  | 15 |
| (N/G)+(N/B) <sup>10</sup> | 0.00  | -0.06      | 21.56 | 0.66  | 0.76  | 19.24 | 0.21 | -7.49  | □ | ■  | ■  | 18 |
| G×(B+G+R)                 | 0.05  | -0.02      | 17.93 | 0.59  | 0.69  | 15.37 | 0.21 | -4.23  | □ | ■  | ■  | 15 |

| Algorithm                              | r <sup>2</sup> | Adj. r <sup>2</sup> | RMSE  | RMLSE | NRMSE | MAE   | MAPE | Bias   | p | CV | NM | n  |
|----------------------------------------|----------------|---------------------|-------|-------|-------|-------|------|--------|---|----|----|----|
| [(1/B)-(1/G)]×N <sup>10</sup>          | 0.04           | -0.02               | 18.51 | 0.63  | 0.74  | 16.40 | 0.22 | -4.70  | □ | ■  | ■  | 17 |
| [(1/R)-(1/G)]×N <sup>10</sup>          | 0.02           | -0.04               | 26.36 | 0.73  | 0.93  | 24.77 | 0.22 | -14.42 | □ | □  | ■  | 18 |
| [(1/R)-(1/B)]×N <sup>10</sup>          | 0.01           | -0.05               | 26.29 | 0.73  | 0.93  | 24.98 | 0.23 | -14.26 | □ | ■  | ■  | 18 |
| [(1/R)-(0.2363×(1/G))]×N <sup>11</sup> | 0.00           | -0.06               | 21.98 | 0.67  | 0.78  | 21.71 | 0.22 | -10.76 | □ | ■  | ■  | 18 |
| [(1/R)-(1/B)]/N <sup>12</sup>          | 0.00           | -0.06               | 22.70 | 0.66  | 0.80  | 19.67 | 0.21 | -8.49  | □ | ■  | ■  | 18 |
| (B/R)×N                                | 0.00           | -0.06               | 23.00 | 0.69  | 0.81  | 20.02 | 0.23 | -7.86  | □ | □  | ■  | 18 |
| (G/R)×N                                | 0.01           | -0.05               | 25.81 | 0.72  | 0.91  | 23.49 | 0.22 | -12.90 | □ | ■  | ■  | 18 |
| (R/B)×N                                | 0.01           | -0.05               | 24.65 | 0.70  | 0.87  | 22.72 | 0.22 | -10.96 | □ | ■  | ■  | 18 |
| (R/G)×N                                | 0.04           | -0.02               | 23.23 | 0.78  | 0.80  | 21.64 | 0.53 | -12.96 | □ | ■  | ■  | 18 |
| (R×N)/B <sup>13</sup>                  | 0.01           | -0.05               | 23.67 | 0.69  | 0.84  | 21.16 | 0.22 | -10.31 | □ | ■  | ■  | 18 |
| (B/G)×(B/R)                            | 0.00           | -0.06               | 20.50 | 0.67  | 0.82  | 18.01 | 0.22 | -6.92  | □ | ■  | ■  | 17 |
| (B/G)×(B/N)                            | 0.14           | 0.08                | 22.15 | 0.69  | 0.75  | 21.11 | 0.24 | -3.98  | □ | ■  | □  | 16 |
| (B/G)×(R/G)                            | 0.26           | 0.19                | 8.43  | 0.41  | 0.73  | 8.33  | 0.15 | -2.54  | □ | ■  | ■  | 13 |
| (B/G)×(R/N)                            | 0.02           | -0.04               | 24.74 | 0.70  | 0.86  | 22.75 | 0.22 | -11.17 | □ | ■  | ■  | 17 |
| (B/G)×(N/B)                            | 0.05           | -0.02               | 23.31 | 0.65  | 0.81  | 20.66 | 0.20 | -11.17 | □ | ■  | ■  | 17 |
| (B/G)×(N/G)                            | 0.00           | -0.07               | 18.20 | 0.61  | 0.72  | 16.00 | 0.20 | -5.35  | □ | ■  | ■  | 17 |
| (B/G)×(N/R)                            | 0.16           | 0.10                | 22.32 | 0.64  | 0.77  | 20.53 | 0.22 | -6.73  | □ | ■  | ■  | 16 |
| (B/R)×(B/N)                            | 0.04           | -0.02               | 23.23 | 0.70  | 0.82  | 20.44 | 0.23 | -7.58  | □ | ■  | ■  | 18 |
| (B/R)×(G/R)                            | 0.00           | -0.06               | 26.38 | 0.74  | 0.93  | 25.33 | 0.23 | -14.77 | □ | ■  | ■  | 18 |
| (B/R)×(G/N)                            | 0.01           | -0.06               | 21.62 | 0.63  | 0.75  | 18.59 | 0.20 | -6.94  | □ | □  | ■  | 17 |
| (B/R)×(N/R)                            | 0.01           | -0.06               | 22.68 | 0.66  | 0.80  | 19.53 | 0.21 | -8.38  | □ | ■  | ■  | 18 |
| (B/N)×(G/N)                            | 0.01           | -0.05               | 22.73 | 0.65  | 0.79  | 19.94 | 0.21 | -9.70  | □ | ■  | ■  | 17 |
| (B/N)×(R/N)                            | 0.04           | -0.03               | 23.68 | 0.68  | 0.82  | 20.67 | 0.21 | -8.64  | □ | ■  | ■  | 16 |
| (G/B)×(G/R)                            | 0.23           | 0.18                | 18.21 | 0.58  | 0.64  | 16.70 | 0.19 | -6.98  | ■ | ■  | ■  | 18 |
| (G/B)×(G/N)                            | 0.09           | 0.02                | 19.71 | 0.66  | 0.76  | 17.47 | 0.24 | -4.86  | □ | ■  | ■  | 15 |
| (G/B)×(R/B)                            | 0.00           | -0.07               | 18.54 | 0.58  | 0.74  | 16.12 | 0.19 | -6.71  | □ | ■  | ■  | 17 |
| (G/B)×(R/N)                            | 0.06           | -0.01               | 21.09 | 0.67  | 0.81  | 19.71 | 0.23 | -7.26  | □ | ■  | ■  | 15 |
| (G/B)×(N/B)                            | 0.08           | 0.03                | 22.43 | 0.67  | 0.79  | 20.15 | 0.22 | -6.58  | □ | ■  | ■  | 18 |
| (G/B)×(N/R)                            | 0.04           | -0.03               | 21.72 | 0.68  | 0.77  | 20.17 | 0.23 | -6.62  | □ | ■  | ■  | 18 |
| (G/R)×(G/N)                            | 0.02           | -0.05               | 19.91 | 0.67  | 0.78  | 18.03 | 0.23 | -6.71  | □ | □  | ■  | 16 |
| (G/R)×(N/R)                            | 0.02           | -0.04               | 22.65 | 0.69  | 0.79  | 20.13 | 0.24 | -6.92  | □ | ■  | ■  | 17 |
| (G/N)×(R/N)                            | 0.03           | -0.04               | 20.27 | 0.62  | 0.78  | 19.21 | 0.20 | -9.97  | □ | ■  | ■  | 15 |
| (R/B)×(R/G)                            | 0.00           | -0.06               | 23.04 | 0.68  | 0.81  | 19.62 | 0.21 | -8.47  | □ | ■  | ■  | 18 |
| (R/B)×(R/N)                            | 0.01           | -0.07               | 19.54 | 0.58  | 0.73  | 18.43 | 0.19 | -8.86  | □ | ■  | ■  | 14 |
| (R/B)×(N/B)                            | 0.02           | -0.04               | 22.48 | 0.67  | 0.79  | 20.42 | 0.21 | -9.20  | □ | ■  | ■  | 18 |
| (R/B)×(N/G)                            | 0.00           | -0.06               | 22.73 | 0.67  | 0.80  | 19.62 | 0.21 | -8.21  | □ | ■  | ■  | 18 |
| (R/G)×(R/N)                            | 0.03           | -0.03               | 26.71 | 0.69  | 0.92  | 26.36 | 0.21 | -16.23 | □ | ■  | ■  | 16 |
| (R/G)×(N/G)                            | 0.02           | -0.04               | 22.52 | 0.64  | 0.80  | 19.59 | 0.21 | -7.77  | □ | □  | ■  | 18 |
| (N/B)×(N/G)                            | 0.00           | -0.06               | 24.78 | 0.71  | 0.88  | 22.65 | 0.24 | -10.57 | □ | ■  | ■  | 18 |
| (N/B)×(N/R)                            | 0.00           | -0.06               | 24.85 | 0.74  | 0.88  | 22.32 | 0.24 | -10.10 | □ | ■  | ■  | 18 |
| (N/G)×(N/R)                            | 0.01           | -0.05               | 23.03 | 0.69  | 0.81  | 19.73 | 0.23 | -7.90  | □ | ■  | ■  | 18 |

(1) Fadel et al., 2016; (2) Patra et al., 2015; (3) Tucker, 1979; (4) Ho et al., 2017; (5) Boucher et al., 2018; (6) Kabbara et al., 2008; (7) Trinh et al., 2017; (8) Alawadi et al., 2010; (9) Mayo et al., 1995; (10) Keith et al., 2018; (11) Chenet et al., 2013; (12) Singh et al., 2014; (13) Guan, 2009.

Kab1 = 1.67-3.94×ln(B)+3.78×ln(G)

NDVI = (N-R)/(N+R)

NRVI = [(R/NIR)-1]/[(R/NIR)+1]

SABI = (N-R)/(B+G)

**OC2=0.1977+(-1.8117(log10(BG)))1+(1.9743(log10(BG)))2+(2.5635(log10(BG)))3+(-0.7218(log10(BG)))4**

**Table S2d.** Chl-*a* retrieval algorithm results summary for OWT-D<sub>h</sub> after outlier removal. Parameters displayed are coefficient of determination ( $r^2$ ), p-value (p), root mean square error (RMSE; ( $\mu\text{g L}^{-1}$ )), root mean square log error (RMSLE), normalized root mean square error, mean absolute error (MAE, ( $\mu\text{g L}^{-1}$ )), median absolute percentage error (MAPE %), bias ( $\mu\text{g L}^{-1}$ ), Breusch-Pagan constant variance (CV), and Shapiro-Wilks normality (NM). Filled boxes indicate that the assumptions of linear regressions have been met ( $r^2$  p < 0.05, CV and NM p  $\geq$  0.05), empty boxes indicate that the assumptions have not been met.

| Algorithm                 | $r^2$ | Adj. $r^2$ | RMSE | RMLSE | NRMSE | MAE  | MAPE | Bias  | p | CV | NM | n  |
|---------------------------|-------|------------|------|-------|-------|------|------|-------|---|----|----|----|
| B                         | 0.36  | 0.29       | 0.39 | 0.17  | 0.57  | 0.39 | 0.60 | -0.10 | ■ | ■  | ■  | 11 |
| G                         | 0.17  | 0.10       | 1.28 | 0.39  | 0.71  | 1.27 | 1.04 | -0.66 | □ | ■  | ■  | 14 |
| R                         | 0.05  | -0.04      | 0.72 | 0.29  | 0.67  | 0.66 | 0.98 | -0.10 | □ | ■  | ■  | 13 |
| N                         | 0.74  | 0.72       | 0.37 | 0.13  | 0.32  | 0.35 | 0.41 | -0.16 | ■ | ■  | ■  | 14 |
| B×G                       | 0.12  | 0.01       | 0.48 | 0.21  | 0.70  | 0.48 | 0.85 | -0.14 | □ | ■  | ■  | 10 |
| B×R                       | 0.03  | -0.07      | 0.51 | 0.23  | 0.78  | 0.50 | 0.99 | -0.12 | □ | ■  | ■  | 12 |
| B×N                       | 0.26  | 0.21       | 0.95 | 0.29  | 0.54  | 0.79 | 0.79 | -0.25 | □ | ■  | ■  | 15 |
| G×R                       | 0.22  | 0.15       | 1.02 | 0.32  | 0.57  | 0.95 | 1.09 | -0.39 | □ | ■  | ■  | 14 |
| G×N                       | 0.43  | 0.37       | 0.31 | 0.15  | 0.47  | 0.31 | 0.70 | -0.04 | ■ | ■  | ■  | 11 |
| R×N                       | 0.57  | 0.52       | 0.28 | 0.14  | 0.40  | 0.28 | 0.77 | -0.07 | ■ | ■  | ■  | 10 |
| B/G                       | 0.05  | -0.02      | 0.97 | 0.32  | 0.54  | 0.92 | 0.89 | -0.36 | □ | ■  | ■  | 15 |
| B/R                       | 0.05  | -0.02      | 2.89 | 0.55  | 0.48  | 2.36 | 1.27 | -1.45 | □ | ■  | ■  | 16 |
| B/N                       | 0.48  | 0.43       | 0.36 | 0.17  | 0.55  | 0.35 | 0.80 | -0.08 | ■ | ■  | ■  | 12 |
| G/B                       | 0.03  | -0.04      | 1.01 | 0.33  | 0.57  | 0.97 | 0.90 | -0.41 | □ | ■  | ■  | 15 |
| G/R                       | 0.19  | 0.11       | 0.87 | 0.31  | 0.74  | 0.85 | 0.82 | -0.42 | □ | ■  | ■  | 13 |
| G/N                       | 0.91  | 0.91       | 0.24 | 0.08  | 0.21  | 0.23 | 0.33 | 0.04  | ■ | ■  | ■  | 13 |
| R/B                       | 0.03  | -0.04      | 2.93 | 0.57  | 0.49  | 2.35 | 1.41 | -1.33 | □ | ■  | ■  | 16 |
| R/G                       | 0.18  | 0.11       | 0.78 | 0.30  | 0.67  | 0.69 | 0.85 | -0.16 | □ | ■  | ■  | 13 |
| R/N                       | 0.65  | 0.62       | 0.24 | 0.12  | 0.37  | 0.24 | 0.62 | -0.03 | ■ | ■  | ■  | 12 |
| N/B                       | 0.71  | 0.69       | 0.37 | 0.15  | 0.33  | 0.35 | 0.66 | -0.12 | ■ | ■  | ■  | 14 |
| N/G                       | 0.97  | 0.97       | NA   | NA    | NA    | NA   | 0.22 | -0.02 | ■ | ■  | □  | 9  |
| N/R                       | 0.72  | 0.70       | 0.37 | 0.14  | 0.33  | 0.34 | 0.61 | -0.07 | ■ | ■  | ■  | 14 |
| B×G×R <sup>1</sup>        | 0.17  | 0.10       | 1.33 | 0.41  | 0.73  | 1.31 | 1.19 | -0.67 | □ | ■  | ■  | 14 |
| B×G×N <sup>1</sup>        | 0.26  | 0.20       | 1.10 | 0.32  | 0.60  | 1.08 | 0.86 | -0.70 | □ | ■  | ■  | 14 |
| B×R×N <sup>1</sup>        | 0.36  | 0.29       | 0.34 | 0.16  | 0.51  | 0.34 | 0.73 | -0.05 | ■ | ■  | ■  | 11 |
| G×R×N <sup>1</sup>        | 0.14  | 0.07       | 1.09 | 0.34  | 0.60  | 1.05 | 0.89 | -0.56 | □ | ■  | ■  | 14 |
| Avg(B;G) <sup>1,2</sup>   | 0.01  | -0.08      | 0.90 | 0.32  | 0.52  | 0.76 | 0.91 | -0.22 | □ | ■  | ■  | 13 |
| Avg(B;R) <sup>1,2</sup>   | 0.16  | 0.06       | 0.39 | 0.18  | 0.57  | 0.38 | 0.74 | -0.11 | □ | ■  | ■  | 11 |
| Avg(B;N) <sup>1,2</sup>   | 0.29  | 0.23       | 1.05 | 0.31  | 0.58  | 0.98 | 0.76 | -0.54 | ■ | ■  | ■  | 14 |
| Avg(G;R) <sup>1,2</sup>   | 0.22  | 0.16       | 1.25 | 0.38  | 0.69  | 1.19 | 1.15 | -0.50 | □ | ■  | ■  | 14 |
| Avg(G;N) <sup>1,2</sup>   | 0.42  | 0.36       | 0.35 | 0.16  | 0.54  | 0.34 | 0.77 | -0.15 | ■ | ■  | ■  | 12 |
| Avg(R;N) <sup>1,2</sup>   | 0.22  | 0.16       | 1.04 | 0.30  | 0.59  | 0.98 | 0.65 | -0.56 | □ | ■  | ■  | 15 |
| N-R <sup>3,4</sup>        | 0.61  | 0.57       | 0.25 | 0.11  | 0.38  | 0.25 | 0.54 | -0.09 | ■ | ■  | ■  | 12 |
| Kab1 <sup>5,6</sup>       | 0.03  | -0.04      | 1.11 | 0.36  | 0.63  | 0.98 | 0.96 | -0.39 | □ | ■  | ■  | 15 |
| NDVI                      | 0.79  | 0.77       | 0.31 | 0.12  | 0.27  | 0.29 | 0.50 | 0.00  | ■ | ■  | ■  | 14 |
| NRVI                      | 0.79  | 0.77       | 0.30 | 0.11  | 0.27  | 0.28 | 0.43 | -0.05 | ■ | ■  | ■  | 14 |
| OC2 <sup>7</sup>          | 0.03  | -0.04      | 1.38 | 0.43  | 0.78  | 1.32 | 0.99 | -0.72 | □ | ■  | ■  | 15 |
| SAB1 <sup>5,8</sup>       | 0.74  | 0.72       | 0.39 | 0.14  | 0.34  | 0.38 | 0.59 | -0.11 | ■ | ■  | ■  | 14 |
| (B-R)/G <sup>4,9</sup>    | 0.06  | -0.02      | 1.25 | 0.38  | 0.70  | 1.14 | 0.97 | -0.62 | □ | ■  | ■  | 15 |
| (N/G)+(N/B) <sup>10</sup> | 0.90  | 0.89       | 0.17 | 0.07  | 0.20  | 0.16 | 0.44 | -0.01 | ■ | ■  | ■  | 12 |
| G×(B+G+R)                 | 0.18  | 0.11       | 1.11 | 0.34  | 0.61  | 1.01 | 1.16 | -0.39 | □ | ■  | ■  | 14 |

| Algorithm                              | r <sup>2</sup> | Adj. r <sup>2</sup> | RMSE | RMLSE | NRMSE | MAE  | MAPE | Bias  | p | CV | NM | n  |
|----------------------------------------|----------------|---------------------|------|-------|-------|------|------|-------|---|----|----|----|
| [(1/B)-(1/G)]×N <sup>10</sup>          | 0.16           | 0.10                | 1.24 | 0.36  | 0.70  | 1.18 | 0.82 | -0.66 | □ | ■  | ■  | 15 |
| [(1/R)-(1/G)]×N <sup>10</sup>          | 0.67           | 0.63                | 0.49 | 0.18  | 0.40  | 0.49 | 0.66 | -0.20 | ■ | ■  | □  | 12 |
| [(1/R)-(1/B)]×N <sup>10</sup>          | 0.45           | 0.41                | 0.91 | 0.28  | 0.51  | 0.78 | 0.89 | -0.26 | ■ | ■  | ■  | 15 |
| [(1/R)-(0.2363×(1/G))]×N <sup>11</sup> | 0.71           | 0.68                | 0.39 | 0.15  | 0.34  | 0.34 | 0.64 | -0.14 | ■ | ■  | ■  | 14 |
| [(1/R)-(1/B)]/N <sup>12</sup>          | 0.03           | -0.06               | 0.60 | 0.25  | 0.76  | 0.59 | 0.91 | -0.24 | □ | ■  | ■  | 12 |
| (B/R)×N                                | 0.19           | 0.12                | 0.80 | 0.31  | 0.71  | 0.78 | 1.10 | -0.21 | □ | ■  | ■  | 14 |
| (G/R)×N                                | 0.73           | 0.71                | 0.37 | 0.14  | 0.33  | 0.35 | 0.63 | -0.03 | ■ | ■  | ■  | 14 |
| (R/B)×N                                | 0.31           | 0.26                | 0.87 | 0.28  | 0.49  | 0.78 | 0.90 | -0.28 | ■ | ■  | ■  | 15 |
| (R/G)×N                                | 0.68           | 0.65                | 0.41 | 0.14  | 0.35  | 0.40 | 0.48 | -0.19 | ■ | ■  | ■  | 12 |
| (R×N)/B <sup>13</sup>                  | 0.31           | 0.26                | 1.05 | 0.32  | 0.59  | 1.00 | 0.88 | -0.53 | ■ | ■  | ■  | 15 |
| (B/G)×(B/R)                            | 0.08           | 0.01                | 1.25 | 0.39  | 0.70  | 1.13 | 1.05 | -0.48 | □ | ■  | ■  | 15 |
| (B/G)×(B/N)                            | 0.19           | 0.09                | 0.39 | 0.18  | 0.66  | 0.39 | 0.88 | -0.10 | □ | ■  | ■  | 10 |
| (B/G)×(R/G)                            | 0.20           | 0.14                | 0.80 | 0.28  | 0.71  | 0.75 | 0.84 | -0.30 | □ | ■  | ■  | 14 |
| (B/G)×(R/N)                            | 0.39           | 0.33                | 0.38 | 0.18  | 0.59  | 0.37 | 0.91 | -0.10 | ■ | ■  | ■  | 12 |
| (B/G)×(N/B)                            | 0.97           | 0.97                | NA   | NA    | NA    | NA   | 0.22 | -0.02 | ■ | ■  | □  | 9  |
| (B/G)×(N/G)                            | 0.43           | 0.39                | 0.86 | 0.25  | 0.48  | 0.73 | 0.69 | -0.23 | ■ | ■  | ■  | 15 |
| (B/G)×(N/R)                            | 0.49           | 0.46                | 0.99 | 0.27  | 0.56  | 0.98 | 0.71 | -0.63 | ■ | ■  | ■  | 15 |
| (B/R)×(B/N)                            | 0.18           | 0.11                | 0.79 | 0.26  | 0.46  | 0.68 | 0.86 | -0.26 | □ | ■  | ■  | 14 |
| (B/R)×(G/R)                            | 0.00           | -0.08               | 0.73 | 0.29  | 0.65  | 0.71 | 0.84 | -0.17 | □ | ■  | ■  | 14 |
| (B/R)×(G/N)                            | 0.59           | 0.55                | 0.38 | 0.17  | 0.46  | 0.37 | 0.75 | -0.10 | ■ | ■  | ■  | 13 |
| (B/R)×(N/R)                            | 0.56           | 0.52                | 0.54 | 0.20  | 0.48  | 0.50 | 0.82 | -0.18 | ■ | ■  | ■  | 14 |
| (B/N)×(G/N)                            | 0.54           | 0.48                | 0.23 | 0.11  | 0.41  | 0.23 | 0.66 | -0.05 | ■ | ■  | ■  | 11 |
| (B/N)×(R/N)                            | 0.54           | 0.49                | 0.23 | 0.11  | 0.41  | 0.23 | 0.62 | -0.06 | ■ | ■  | ■  | 11 |
| (G/B)×(G/R)                            | 0.16           | 0.09                | 0.74 | 0.27  | 0.66  | 0.72 | 0.82 | -0.29 | □ | ■  | ■  | 14 |
| (G/B)×(G/N)                            | 0.78           | 0.76                | 0.45 | 0.16  | 0.40  | 0.43 | 0.62 | -0.03 | ■ | ■  | ■  | 14 |
| (G/B)×(R/B)                            | 0.04           | -0.04               | 1.28 | 0.41  | 0.72  | 1.16 | 1.03 | -0.54 | □ | ■  | ■  | 15 |
| (G/B)×(R/N)                            | 0.77           | 0.75                | 0.38 | 0.13  | 0.33  | 0.38 | 0.54 | -0.16 | ■ | ■  | ■  | 14 |
| (G/B)×(N/B)                            | 0.30           | 0.25                | 0.94 | 0.31  | 0.53  | 0.83 | 1.08 | -0.33 | ■ | ■  | ■  | 15 |
| (G/B)×(N/R)                            | 0.65           | 0.62                | 0.39 | 0.16  | 0.35  | 0.37 | 0.88 | -0.07 | ■ | ■  | ■  | 14 |
| (G/R)×(G/N)                            | 0.91           | 0.91                | 0.16 | 0.07  | 0.14  | 0.16 | 0.41 | -0.01 | ■ | ■  | ■  | 13 |
| (G/R)×(N/R)                            | 0.72           | 0.69                | 0.38 | 0.14  | 0.33  | 0.35 | 0.52 | -0.08 | ■ | ■  | ■  | 13 |
| (G/N)×(R/N)                            | 0.70           | 0.67                | 0.19 | 0.10  | 0.29  | 0.19 | 0.55 | -0.03 | ■ | ■  | ■  | 12 |
| (R/B)×(R/G)                            | 0.00           | -0.09               | 0.89 | 0.32  | 0.76  | 0.88 | 0.79 | -0.50 | □ | ■  | ■  | 13 |
| (R/B)×(R/N)                            | 0.70           | 0.67                | 0.48 | 0.17  | 0.43  | 0.47 | 0.68 | -0.22 | ■ | ■  | ■  | 14 |
| (R/B)×(N/B)                            | 0.25           | 0.20                | 0.95 | 0.32  | 0.54  | 0.82 | 1.09 | -0.26 | □ | ■  | ■  | 15 |
| (R/B)×(N/G)                            | 0.65           | 0.62                | 0.39 | 0.16  | 0.35  | 0.39 | 0.67 | -0.10 | ■ | ■  | □  | 14 |
| (R/G)×(R/N)                            | 0.55           | 0.50                | 0.28 | 0.13  | 0.41  | 0.27 | 0.63 | -0.06 | ■ | ■  | ■  | 11 |
| (R/G)×(N/G)                            | 0.85           | 0.83                | 0.24 | 0.10  | 0.30  | 0.23 | 0.53 | -0.05 | ■ | ■  | □  | 12 |
| (N/B)×(N/G)                            | 0.88           | 0.87                | 0.22 | 0.09  | 0.27  | 0.22 | 0.49 | -0.04 | ■ | ■  | ■  | 11 |
| (N/B)×(N/R)                            | 0.86           | 0.85                | 0.23 | 0.10  | 0.28  | 0.22 | 0.53 | -0.03 | ■ | ■  | ■  | 12 |
| (N/G)×(N/R)                            | 0.65           | 0.62                | 0.49 | 0.17  | 0.42  | 0.48 | 0.58 | -0.25 | ■ | ■  | ■  | 13 |

(1) Fadel et al., 2016; (2) Patra et al., 2015; (3) Tucker, 1979; (4) Ho et al., 2017; (5) Boucher et al., 2018; (6) Kabbara et al., 2008; (7) Trinh et al., 2017; (8) Alawadi et al., 2010; (9) Mayo et al., 1995; (10) Keith et al., 2018; (11) Chenet et al., 2013; (12) Singh et al., 2014; (13) Guan, 2009.

Kab1 = 1.67-3.94×ln(B)+3.78×ln(G)

NDVI = (N-R)/(N+R)

NRVI = [(R/NIR)-1]/[(R/NIR)+1]

SABI = (N-R)/(B+G)

**OC2 = 0.1977+(-1.8117(log10(BG)))1+(1.9743(log10(BG)))2+(2.5635(log10(BG)))3+(-0.7218(log10(BG)))4**

**Table S2e.** Chl-*a* retrieval algorithm results summary for OWT-E<sub>h</sub> after outlier removal. Parameters displayed are coefficient of determination ( $r^2$ ), p-value (p), root mean square error (RMSE; ( $\mu\text{g L}^{-1}$ )), root mean square log error (RMSLE), normalized root mean square error, mean absolute error (MAE, ( $\mu\text{g L}^{-1}$ )), median absolute percentage error (MAPE %), bias ( $\mu\text{g L}^{-1}$ ), Breusch-Pagan constant variance (CV), and Shapiro-Wilks normality (NM). Filled boxes indicate that the assumptions of linear regressions have been met ( $r^2 \geq 0.05$ , CV and NM  $p \geq 0.05$ ), empty boxes indicate that the assumptions have not been met.

| Algorithm                 | $r^2$ | Adj. $r^2$ | RMSE  | RMLSE | NRMSE | MAE   | MAPE | Bias  | p | CV | NM | n  |
|---------------------------|-------|------------|-------|-------|-------|-------|------|-------|---|----|----|----|
| B                         | 0.02  | -0.01      | 10.97 | 0.60  | 0.84  | 8.82  | 0.23 | -4.43 | □ | ■  | ■  | 47 |
| G                         | 0.11  | 0.09       | 11.55 | 0.56  | 0.85  | 8.94  | 0.20 | -3.65 | ■ | ■  | ■  | 47 |
| R                         | 0.13  | 0.11       | 12.67 | 0.62  | 0.89  | 9.37  | 0.22 | -3.62 | ■ | ■  | ■  | 49 |
| N                         | 0.10  | 0.08       | 10.36 | 0.63  | 0.91  | 7.86  | 0.19 | -2.76 | ■ | ■  | ■  | 53 |
| B×G                       | 0.13  | 0.10       | 10.35 | 0.56  | 0.78  | 8.61  | 0.17 | -3.46 | ■ | ■  | ■  | 43 |
| B×R                       | 0.38  | 0.37       | 8.29  | 0.49  | 0.69  | 6.40  | 0.15 | -1.76 | ■ | ■  | ■  | 43 |
| B×N                       | 0.04  | 0.02       | 12.27 | 0.68  | 0.96  | 9.01  | 0.22 | -3.62 | □ | ■  | ■  | 54 |
| G×R                       | 0.20  | 0.19       | 10.68 | 0.59  | 0.78  | 8.70  | 0.17 | -3.19 | ■ | ■  | ■  | 49 |
| G×N                       | 0.01  | -0.01      | 13.83 | 0.68  | 0.96  | 9.99  | 0.20 | -4.21 | □ | ■  | ■  | 51 |
| R×N                       | 0.01  | -0.01      | 12.54 | 0.65  | 0.87  | 9.66  | 0.22 | -4.00 | □ | ■  | ■  | 51 |
| B/G                       | 0.01  | 0.00       | 16.86 | 0.75  | 0.91  | 11.83 | 0.27 | -6.38 | □ | ■  | ■  | 58 |
| B/R                       | 0.06  | 0.04       | 17.37 | 0.75  | 0.94  | 11.63 | 0.23 | -6.17 | □ | ■  | ■  | 57 |
| B/N                       | 0.77  | 0.77       | 5.83  | 0.29  | 0.54  | 4.27  | 0.11 | -0.63 | ■ | ■  | ■  | 36 |
| G/B                       | 0.02  | 0.00       | 16.67 | 0.76  | 0.87  | 12.83 | 0.26 | -6.87 | □ | ■  | ■  | 59 |
| G/R                       | 0.07  | 0.06       | 18.11 | 0.75  | 0.93  | 12.48 | 0.24 | -6.40 | ■ | ■  | ■  | 55 |
| G/N                       | 0.19  | 0.17       | 11.96 | 0.63  | 0.84  | 9.01  | 0.23 | -3.31 | ■ | ■  | ■  | 55 |
| R/B                       | 0.06  | 0.04       | 18.17 | 0.77  | 0.94  | 12.24 | 0.26 | -5.69 | □ | ■  | ■  | 57 |
| R/G                       | 0.07  | 0.05       | 17.86 | 0.74  | 0.91  | 12.37 | 0.25 | -6.25 | □ | ■  | ■  | 55 |
| R/N                       | 0.35  | 0.34       | 10.28 | 0.54  | 0.71  | 8.08  | 0.20 | -3.34 | ■ | ■  | ■  | 54 |
| N/B                       | 0.77  | 0.76       | 4.47  | 0.27  | 0.41  | 3.59  | 0.10 | -0.58 | ■ | ■  | ■  | 35 |
| N/G                       | 0.22  | 0.21       | 12.40 | 0.62  | 0.87  | 8.84  | 0.17 | -3.14 | ■ | ■  | ■  | 55 |
| N/R                       | 0.34  | 0.33       | 11.38 | 0.57  | 0.80  | 8.31  | 0.20 | -3.10 | ■ | ■  | ■  | 55 |
| B×G×R <sup>1</sup>        | 0.29  | 0.28       | 9.94  | 0.53  | 0.72  | 7.60  | 0.17 | -2.70 | ■ | ■  | ■  | 46 |
| B×G×N <sup>1</sup>        | 0.03  | 0.01       | 11.58 | 0.63  | 0.91  | 8.66  | 0.22 | -4.01 | □ | ■  | ■  | 47 |
| B×R×N <sup>1</sup>        | 0.07  | 0.05       | 10.01 | 0.58  | 0.78  | 8.02  | 0.21 | -3.33 | □ | ■  | ■  | 46 |
| G×R×N <sup>1</sup>        | 0.03  | 0.01       | 12.82 | 0.66  | 0.89  | 9.77  | 0.20 | -3.49 | □ | ■  | ■  | 51 |
| Avg(B;G) <sup>1,2</sup>   | 0.00  | -0.02      | 10.56 | 0.61  | 0.94  | 8.05  | 0.21 | -3.37 | □ | □  | ■  | 47 |
| Avg(B;R) <sup>1,2</sup>   | 0.31  | 0.30       | 8.54  | 0.50  | 0.71  | 6.88  | 0.16 | -2.55 | ■ | ■  | ■  | 42 |
| Avg(B;N) <sup>1,2</sup>   | 0.11  | 0.09       | 12.09 | 0.62  | 0.88  | 9.08  | 0.23 | -3.06 | ■ | ■  | ■  | 52 |
| Avg(G;R) <sup>1,2</sup>   | 0.20  | 0.18       | 11.21 | 0.55  | 0.82  | 8.47  | 0.16 | -3.34 | ■ | ■  | ■  | 47 |
| Avg(G;N) <sup>1,2</sup>   | 0.01  | -0.01      | 13.15 | 0.67  | 0.92  | 9.95  | 0.23 | -3.75 | □ | ■  | ■  | 51 |
| Avg(R;N) <sup>1,2</sup>   | 0.00  | -0.02      | 11.79 | 0.65  | 0.89  | 9.27  | 0.20 | -3.89 | □ | ■  | ■  | 50 |
| N-R <sup>3,4</sup>        | 0.32  | 0.31       | 11.17 | 0.57  | 0.78  | 8.42  | 0.20 | -3.57 | ■ | ■  | ■  | 55 |
| Kab1 <sup>5,6</sup>       | 0.02  | 0.00       | 16.80 | 0.77  | 0.91  | 12.21 | 0.24 | -6.56 | □ | ■  | ■  | 58 |
| NDVI                      | 0.36  | 0.35       | 10.74 | 0.58  | 0.75  | 8.23  | 0.19 | -3.45 | ■ | ■  | ■  | 54 |
| NRVI                      | 0.36  | 0.35       | 11.38 | 0.57  | 0.79  | 8.21  | 0.19 | -2.53 | ■ | ■  | ■  | 54 |
| OC2 <sup>7</sup>          | 0.01  | -0.01      | 16.31 | 0.75  | 0.88  | 11.55 | 0.23 | -5.55 | □ | ■  | ■  | 57 |
| SAB1 <sup>5,8</sup>       | 0.34  | 0.33       | 11.57 | 0.58  | 0.81  | 8.40  | 0.18 | -3.21 | ■ | ■  | ■  | 55 |
| (B-R)/G <sup>4,9</sup>    | 0.02  | 0.01       | 16.92 | 0.76  | 0.92  | 11.74 | 0.27 | -6.26 | □ | ■  | ■  | 58 |
| (N/G)+(N/B) <sup>10</sup> | 0.16  | 0.15       | 14.02 | 0.67  | 0.88  | 10.45 | 0.20 | -4.30 | ■ | ■  | ■  | 56 |
| G×(B+G+R)                 | 0.11  | 0.09       | 11.52 | 0.59  | 0.85  | 9.08  | 0.18 | -3.42 | ■ | ■  | ■  | 47 |

| Algorithm                              | r <sup>2</sup> | Adj. r <sup>2</sup> | RMSE  | RMLSE | NRMSE | MAE   | MAPE | Bias  | p | CV | NM | n  |
|----------------------------------------|----------------|---------------------|-------|-------|-------|-------|------|-------|---|----|----|----|
| [(1/B)-(1/G)]×N <sup>10</sup>          | 0.04           | 0.02                | 17.25 | 0.77  | 0.93  | 11.76 | 0.26 | -5.57 | □ | ■  | ■  | 58 |
| [(1/R)-(1/G)]×N <sup>10</sup>          | 0.34           | 0.32                | 12.09 | 0.60  | 0.76  | 9.44  | 0.21 | -3.80 | ■ | ■  | ■  | 55 |
| [(1/R)-(1/B)]×N <sup>10</sup>          | 0.29           | 0.27                | 12.52 | 0.59  | 0.84  | 9.06  | 0.18 | -3.89 | ■ | ■  | ■  | 51 |
| [(1/R)-(0.2363×(1/G))]×N <sup>11</sup> | 0.36           | 0.34                | 11.15 | 0.56  | 0.78  | 8.15  | 0.17 | -3.19 | ■ | ■  | ■  | 55 |
| [(1/R)-(1/B)]/N <sup>12</sup>          | 0.03           | 0.02                | 14.30 | 0.71  | 0.89  | 10.74 | 0.24 | -5.27 | □ | ■  | ■  | 55 |
| (B/R)×N                                | 0.11           | 0.09                | 14.47 | 0.68  | 0.94  | 10.34 | 0.20 | -3.75 | ■ | ■  | ■  | 52 |
| (G/R)×N                                | 0.16           | 0.14                | 11.21 | 0.61  | 0.85  | 8.63  | 0.21 | -3.84 | ■ | ■  | ■  | 53 |
| (R/B)×N                                | 0.05           | 0.03                | 14.33 | 0.69  | 0.93  | 10.45 | 0.23 | -5.66 | □ | ■  | ■  | 51 |
| (R/G)×N                                | 0.05           | 0.04                | 10.63 | 0.62  | 0.93  | 8.00  | 0.23 | -3.64 | □ | ■  | ■  | 53 |
| (R×N)/B <sup>13</sup>                  | 0.05           | 0.03                | 13.50 | 0.67  | 0.88  | 10.51 | 0.22 | -3.82 | □ | ■  | ■  | 51 |
| (B/G)×(B/R)                            | 0.02           | 0.00                | 16.77 | 0.75  | 0.91  | 11.87 | 0.25 | -6.68 | □ | ■  | ■  | 58 |
| (B/G)×(B/N)                            | 0.30           | 0.28                | 7.46  | 0.50  | 0.74  | 5.88  | 0.20 | -2.11 | ■ | ■  | ■  | 38 |
| (B/G)×(R/G)                            | 0.04           | 0.02                | 15.07 | 0.74  | 0.95  | 10.38 | 0.29 | -4.56 | □ | ■  | ■  | 53 |
| (B/G)×(R/N)                            | 0.65           | 0.64                | 6.22  | 0.39  | 0.53  | 5.20  | 0.14 | -0.89 | ■ | ■  | ■  | 43 |
| (B/G)×(N/B)                            | 0.22           | 0.21                | 12.07 | 0.61  | 0.84  | 8.58  | 0.21 | -3.22 | ■ | ■  | ■  | 55 |
| (B/G)×(N/G)                            | 0.12           | 0.10                | 12.75 | 0.66  | 0.87  | 9.46  | 0.22 | -4.33 | ■ | ■  | ■  | 56 |
| (B/G)×(N/R)                            | 0.18           | 0.16                | 12.96 | 0.66  | 0.89  | 9.36  | 0.21 | -4.60 | ■ | ■  | ■  | 56 |
| (B/R)×(B/N)                            | 0.01           | 0.00                | 16.98 | 0.77  | 0.92  | 11.86 | 0.25 | -5.44 | □ | ■  | ■  | 55 |
| (B/R)×(G/R)                            | 0.06           | 0.04                | 17.94 | 0.74  | 0.93  | 12.40 | 0.25 | -6.07 | □ | ■  | ■  | 57 |
| (B/R)×(G/N)                            | 0.21           | 0.20                | 13.51 | 0.64  | 0.86  | 9.81  | 0.21 | -3.81 | ■ | ■  | ■  | 48 |
| (B/R)×(N/R)                            | 0.30           | 0.28                | 11.98 | 0.58  | 0.81  | 8.61  | 0.17 | -3.03 | ■ | ■  | ■  | 52 |
| (B/N)×(G/N)                            | 0.28           | 0.27                | 13.32 | 0.62  | 0.82  | 9.69  | 0.20 | -4.27 | ■ | ■  | ■  | 51 |
| (B/N)×(R/N)                            | 0.39           | 0.37                | 11.36 | 0.56  | 0.74  | 8.25  | 0.18 | -2.95 | ■ | ■  | ■  | 49 |
| (G/B)×(G/R)                            | 0.03           | 0.01                | 16.55 | 0.77  | 0.87  | 12.00 | 0.21 | -5.10 | □ | ■  | ■  | 54 |
| (G/B)×(G/N)                            | 0.13           | 0.11                | 12.96 | 0.67  | 0.87  | 9.67  | 0.28 | -5.32 | ■ | ■  | ■  | 53 |
| (G/B)×(R/B)                            | 0.02           | 0.01                | 17.24 | 0.78  | 0.90  | 12.49 | 0.25 | -7.01 | □ | ■  | ■  | 59 |
| (G/B)×(R/N)                            | 0.21           | 0.19                | 12.76 | 0.65  | 0.85  | 9.28  | 0.21 | -3.17 | ■ | ■  | ■  | 52 |
| (G/B)×(N/B)                            | 0.33           | 0.32                | 16.47 | 0.65  | 0.82  | 11.13 | 0.20 | -4.57 | ■ | ■  | ■  | 48 |
| (G/B)×(N/R)                            | 0.67           | 0.66                | 6.87  | 0.39  | 0.53  | 5.49  | 0.13 | -0.80 | ■ | ■  | ■  | 43 |
| (G/R)×(G/N)                            | 0.08           | 0.06                | 13.09 | 0.69  | 0.90  | 9.59  | 0.23 | -4.32 | ■ | ■  | ■  | 56 |
| (G/R)×(N/R)                            | 0.42           | 0.41                | 11.50 | 0.54  | 0.73  | 8.37  | 0.18 | -2.92 | ■ | ■  | ■  | 54 |
| (G/N)×(R/N)                            | 0.28           | 0.27                | 11.46 | 0.60  | 0.79  | 8.60  | 0.21 | -2.84 | ■ | ■  | ■  | 53 |
| (R/B)×(R/G)                            | 0.11           | 0.10                | 17.22 | 0.74  | 0.88  | 12.01 | 0.23 | -5.44 | ■ | ■  | ■  | 56 |
| (R/B)×(R/N)                            | 0.20           | 0.19                | 13.06 | 0.64  | 0.89  | 9.20  | 0.21 | -3.76 | ■ | ■  | ■  | 55 |
| (R/B)×(N/B)                            | 0.10           | 0.08                | 16.71 | 0.70  | 0.86  | 12.03 | 0.25 | -6.22 | ■ | ■  | ■  | 51 |
| (R/B)×(N/G)                            | 0.06           | 0.05                | 16.78 | 0.74  | 0.90  | 12.09 | 0.24 | -5.98 | □ | ■  | ■  | 58 |
| (R/G)×(R/N)                            | 0.56           | 0.55                | 7.61  | 0.45  | 0.60  | 6.09  | 0.17 | -1.70 | ■ | ■  | ■  | 50 |
| (R/G)×(N/G)                            | 0.11           | 0.09                | 13.18 | 0.67  | 0.90  | 9.55  | 0.22 | -4.38 | ■ | ■  | ■  | 56 |
| (N/B)×(N/G)                            | 0.16           | 0.15                | 14.44 | 0.68  | 0.91  | 10.13 | 0.21 | -4.42 | ■ | ■  | ■  | 57 |
| (N/B)×(N/R)                            | 0.41           | 0.40                | 11.44 | 0.54  | 0.71  | 8.82  | 0.16 | -3.26 | ■ | ■  | ■  | 49 |
| (N/G)×(N/R)                            | 0.28           | 0.27                | 11.90 | 0.61  | 0.83  | 8.43  | 0.18 | -3.19 | ■ | ■  | ■  | 55 |

(1) Fadel et al., 2016; (2) Patra et al., 2015; (3) Tucker, 1979; (4) Ho et al., 2017; (5) Boucher et al., 2018; (6) Kabbara et al., 2008; (7) Trinh et al., 2017; (8) Alawadi et al., 2010; (9) Mayo et al., 1995; (10) Keith et al., 2018; (11) Chenet et al., 2013; (12) Singh et al., 2014; (13) Guan, 2009.

Kab1 = 1.67-3.94×ln(B)+3.78×ln(G)

NDVI = (N-R)/(N+R)

NRVI = [(R/NIR)-1]/[(R/NIR)+1]

SABI = (N-R)/(B+G)

**OC2=0.1977+(-1.8117(log10(BG)))1+(1.9743(log10(BG)))2+(2.5635(log10(BG)))3+(-0.7218(log10(BG)))4**

**Table S2f.** Chl-*a* retrieval algorithm results summary for OWT-F<sub>h</sub> after outlier removal. Parameters displayed are coefficient of determination ( $r^2$ ), p-value (p), root mean square error (RMSE; ( $\mu\text{g L}^{-1}$ )), root mean square log error (RMSLE), normalized root mean square error, mean absolute error (MAE, ( $\mu\text{g L}^{-1}$ )), median absolute percentage error (MAPE %), bias ( $\mu\text{g L}^{-1}$ ), Breusch-Pagan constant variance (CV), and Shapiro-Wilks normality (NM). Filled boxes indicate that the assumptions of linear regressions have been met ( $r^2 \geq 0.05$ , CV and NM  $p \geq 0.05$ ), empty boxes indicate that the assumptions have not been met.

| Algorithm                 | $r^2$ | Adj. $r^2$ | RMSE | RMLSE | NRMSE | MAE  | MAPE | Bias  | p | CV | NM | n  |
|---------------------------|-------|------------|------|-------|-------|------|------|-------|---|----|----|----|
| B                         | 0.07  | 0.03       | 3.73 | 0.59  | 0.65  | 2.76 | 0.95 | -1.57 | □ | ■  | ■  | 25 |
| G                         | 0.18  | 0.15       | 5.08 | 0.66  | 0.66  | 3.71 | 1.13 | -1.94 | ■ | ■  | ■  | 28 |
| R                         | 0.31  | 0.28       | 4.88 | 0.60  | 0.62  | 3.53 | 0.57 | -1.66 | ■ | ■  | ■  | 26 |
| N                         | 0.73  | 0.72       | 1.73 | 0.33  | 0.28  | 1.52 | 0.59 | -0.46 | ■ | ■  | ■  | 25 |
| B×G                       | 0.17  | 0.14       | 5.22 | 0.69  | 0.67  | 3.94 | 0.66 | -2.20 | ■ | ■  | ■  | 27 |
| B×R                       | 0.19  | 0.15       | 5.79 | 0.71  | 0.74  | 4.57 | 0.91 | -2.91 | ■ | ■  | ■  | 27 |
| B×N                       | 0.78  | 0.77       | 2.14 | 0.32  | 0.33  | 1.87 | 0.39 | -0.62 | ■ | ■  | ■  | 23 |
| G×R                       | 0.19  | 0.16       | 5.07 | 0.65  | 0.66  | 3.75 | 0.54 | -2.23 | ■ | ■  | ■  | 28 |
| G×N                       | 0.46  | 0.44       | 2.96 | 0.49  | 0.47  | 2.49 | 0.91 | -1.41 | ■ | ■  | ■  | 24 |
| R×N                       | 0.19  | 0.15       | 2.28 | 0.46  | 0.79  | 1.93 | 0.64 | -0.79 | ■ | ■  | ■  | 23 |
| B/G                       | 0.16  | 0.13       | 4.12 | 0.59  | 0.68  | 2.99 | 0.78 | -1.66 | ■ | ■  | ■  | 27 |
| B/R                       | 0.08  | 0.04       | 4.60 | 0.67  | 0.75  | 3.40 | 1.26 | -2.11 | □ | ■  | ■  | 26 |
| B/N                       | 0.49  | 0.47       | 3.90 | 0.56  | 0.50  | 3.13 | 0.74 | -0.72 | ■ | ■  | ■  | 28 |
| G/B                       | 0.16  | 0.13       | 4.61 | 0.66  | 0.76  | 3.48 | 0.75 | -2.63 | ■ | ■  | ■  | 27 |
| G/R                       | 0.01  | -0.03      | 5.99 | 0.74  | 0.78  | 4.72 | 0.87 | -2.10 | □ | ■  | ■  | 26 |
| G/N                       | 0.45  | 0.42       | 1.92 | 0.41  | 0.62  | 1.63 | 0.67 | -0.60 | ■ | ■  | ■  | 25 |
| R/B                       | 0.11  | 0.08       | 4.32 | 0.63  | 0.71  | 3.20 | 0.93 | -1.75 | □ | ■  | ■  | 27 |
| R/G                       | 0.03  | 0.00       | 5.15 | 0.70  | 0.67  | 3.92 | 0.99 | -2.41 | □ | ■  | ■  | 27 |
| R/N                       | 0.44  | 0.42       | 1.45 | 0.35  | 0.56  | 1.22 | 0.65 | -0.37 | ■ | ■  | ■  | 23 |
| N/B                       | 0.46  | 0.44       | 4.04 | 0.54  | 0.52  | 3.40 | 0.78 | -1.62 | ■ | ■  | ■  | 28 |
| N/G                       | 0.61  | 0.59       | 2.45 | 0.42  | 0.41  | 1.97 | 0.74 | -0.90 | ■ | ■  | ■  | 27 |
| N/R                       | 0.67  | 0.66       | 2.03 | 0.38  | 0.34  | 1.57 | 0.79 | -0.52 | ■ | ■  | ■  | 27 |
| B×G×R <sup>1</sup>        | 0.24  | 0.21       | 5.09 | 0.67  | 0.65  | 3.68 | 1.27 | -1.72 | ■ | ■  | ■  | 27 |
| B×G×N <sup>1</sup>        | 0.33  | 0.30       | 2.93 | 0.52  | 0.76  | 2.46 | 0.68 | -1.48 | ■ | ■  | ■  | 24 |
| B×R×N <sup>1</sup>        | 0.28  | 0.24       | 2.80 | 0.50  | 0.72  | 2.36 | 0.85 | -0.74 | ■ | ■  | ■  | 24 |
| G×R×N <sup>1</sup>        | 0.08  | 0.04       | 3.09 | 0.57  | 0.81  | 2.61 | 0.92 | -1.42 | □ | ■  | ■  | 24 |
| Avg(B;G) <sup>1,2</sup>   | 0.17  | 0.13       | 5.16 | 0.68  | 0.66  | 4.00 | 0.88 | -2.23 | ■ | ■  | ■  | 27 |
| Avg(B;R) <sup>1,2</sup>   | 0.09  | 0.05       | 4.11 | 0.67  | 0.67  | 3.45 | 1.18 | -1.83 | □ | ■  | ■  | 26 |
| Avg(B;N) <sup>1,2</sup>   | 0.54  | 0.52       | 4.58 | 0.50  | 0.57  | 3.48 | 0.71 | -1.52 | ■ | ■  | ■  | 26 |
| Avg(G;R) <sup>1,2</sup>   | 0.20  | 0.17       | 5.12 | 0.65  | 0.66  | 3.78 | 0.52 | -2.27 | ■ | ■  | ■  | 28 |
| Avg(G;N) <sup>1,2</sup>   | 0.08  | 0.04       | 3.27 | 0.60  | 0.84  | 2.86 | 0.91 | -1.98 | □ | ■  | ■  | 26 |
| Avg(R;N) <sup>1,2</sup>   | 0.30  | 0.26       | 2.71 | 0.50  | 0.70  | 2.16 | 0.89 | -0.97 | ■ | ■  | ■  | 24 |
| N-R <sup>3,4</sup>        | 0.73  | 0.72       | 1.99 | 0.35  | 0.32  | 1.69 | 0.37 | 0.06  | ■ | ■  | ■  | 26 |
| KabI <sup>5,6</sup>       | 0.16  | 0.12       | 4.11 | 0.60  | 0.68  | 3.09 | 0.82 | -1.97 | ■ | ■  | ■  | 27 |
| NDVI                      | 0.67  | 0.66       | 2.12 | 0.36  | 0.35  | 1.64 | 0.45 | -0.22 | ■ | ■  | ■  | 27 |
| NRVI                      | 0.67  | 0.66       | 2.18 | 0.39  | 0.36  | 1.70 | 0.54 | -0.38 | ■ | ■  | ■  | 27 |
| OC2 <sup>7</sup>          | 0.16  | 0.12       | 3.88 | 0.59  | 0.64  | 2.99 | 0.82 | -1.56 | ■ | ■  | ■  | 27 |
| SABl <sup>5,8</sup>       | 0.71  | 0.70       | 1.88 | 0.36  | 0.31  | 1.54 | 0.52 | -0.51 | ■ | ■  | ■  | 26 |
| (B-R)/G <sup>4,9</sup>    | 0.18  | 0.15       | 4.50 | 0.65  | 0.74  | 3.46 | 0.71 | -2.60 | ■ | ■  | ■  | 27 |
| (N/G)+(N/B) <sup>10</sup> | 0.60  | 0.59       | 3.51 | 0.48  | 0.45  | 2.72 | 0.47 | -1.32 | ■ | ■  | ■  | 28 |
| G×(B+G+R)                 | 0.19  | 0.15       | 5.37 | 0.70  | 0.69  | 4.13 | 0.65 | -2.05 | ■ | ■  | ■  | 28 |



| Algorithm                              | r <sup>2</sup> | Adj. r <sup>2</sup> | RMSE | RMLSE | NRMSE | MAE  | MAPE | Bias  | p | CV | NM | n  |
|----------------------------------------|----------------|---------------------|------|-------|-------|------|------|-------|---|----|----|----|
| [(1/B)-(1/G)]×N <sup>10</sup>          | 0.21           | 0.17                | 5.27 | 0.67  | 0.67  | 3.93 | 0.84 | -2.23 | ■ | ■  | ■  | 27 |
| [(1/R)-(1/G)]×N <sup>10</sup>          | 0.62           | 0.60                | 3.82 | 0.47  | 0.48  | 3.08 | 0.34 | -1.16 | ■ | ■  | ■  | 26 |
| [(1/R)-(1/B)]×N <sup>10</sup>          | 0.54           | 0.52                | 4.96 | 0.55  | 0.63  | 3.67 | 0.53 | -1.33 | ■ | ■  | ■  | 26 |
| [(1/R)-(0.2363×(1/G))]×N <sup>11</sup> | 0.67           | 0.66                | 2.02 | 0.35  | 0.33  | 1.67 | 0.60 | -0.79 | ■ | ■  | ■  | 27 |
| [(1/R)-(1/B)]/N <sup>12</sup>          | 0.05           | 0.01                | 2.29 | 0.51  | 0.75  | 2.06 | 1.11 | -0.77 | □ | ■  | ■  | 23 |
| (B/R)×N                                | 0.02           | -0.02               | 5.41 | 0.72  | 0.71  | 3.89 | 0.93 | -2.14 | □ | ■  | ■  | 27 |
| (G/R)×N                                | 0.78           | 0.77                | 3.00 | 0.38  | 0.38  | 2.27 | 0.40 | -0.51 | ■ | ■  | ■  | 27 |
| (R/B)×N                                | 0.02           | -0.02               | 2.79 | 0.57  | 0.90  | 2.18 | 1.00 | -1.27 | □ | ■  | ■  | 25 |
| (R/G)×N                                | 0.41           | 0.39                | 4.33 | 0.56  | 0.56  | 3.31 | 0.46 | -1.83 | ■ | ■  | ■  | 28 |
| (R×N)/B <sup>13</sup>                  | 0.02           | -0.02               | 2.37 | 0.51  | 0.77  | 2.05 | 1.05 | -0.91 | □ | ■  | ■  | 25 |
| (B/G)×(B/R)                            | 0.15           | 0.12                | 4.43 | 0.66  | 0.73  | 3.43 | 1.10 | -1.90 | ■ | ■  | ■  | 27 |
| (B/G)×(B/N)                            | 0.31           | 0.28                | 3.99 | 0.59  | 0.52  | 3.29 | 0.53 | -1.73 | ■ | ■  | ■  | 28 |
| (B/G)×(R/G)                            | 0.17           | 0.14                | 4.17 | 0.63  | 0.68  | 3.17 | 0.88 | -2.14 | ■ | ■  | ■  | 26 |
| (B/G)×(R/N)                            | 0.48           | 0.46                | 2.39 | 0.49  | 0.37  | 1.99 | 0.94 | -0.42 | ■ | ■  | ■  | 27 |
| (B/G)×(N/B)                            | 0.61           | 0.59                | 2.18 | 0.38  | 0.36  | 1.91 | 0.70 | -0.86 | ■ | ■  | ■  | 27 |
| (B/G)×(N/G)                            | 0.51           | 0.49                | 4.61 | 0.54  | 0.60  | 3.37 | 0.75 | -1.32 | ■ | ■  | ■  | 28 |
| (B/G)×(N/R)                            | 0.59           | 0.57                | 1.93 | 0.37  | 0.50  | 1.52 | 0.49 | -0.52 | ■ | ■  | ■  | 25 |
| (B/R)×(B/N)                            | 0.00           | -0.04               | 2.94 | 0.60  | 0.95  | 2.33 | 1.04 | -1.43 | □ | ■  | ■  | 25 |
| (B/R)×(G/R)                            | 0.02           | -0.02               | 5.83 | 0.73  | 0.75  | 4.23 | 0.98 | -2.17 | □ | ■  | ■  | 27 |
| (B/R)×(G/N)                            | 0.08           | 0.04                | 2.71 | 0.55  | 0.87  | 2.36 | 0.71 | -1.26 | □ | ■  | ■  | 25 |
| (B/R)×(N/R)                            | 0.52           | 0.50                | 4.03 | 0.50  | 0.52  | 3.04 | 0.43 | -1.60 | ■ | ■  | ■  | 28 |
| (B/N)×(G/N)                            | 0.36           | 0.33                | 2.07 | 0.46  | 0.67  | 1.72 | 0.68 | -0.41 | ■ | ■  | ■  | 25 |
| (B/N)×(R/N)                            | 0.46           | 0.43                | 1.50 | 0.37  | 0.55  | 1.28 | 0.61 | -0.62 | ■ | ■  | ■  | 21 |
| (G/B)×(G/R)                            | 0.15           | 0.11                | 4.11 | 0.61  | 0.68  | 3.06 | 0.56 | -1.91 | ■ | ■  | ■  | 27 |
| (G/B)×(G/N)                            | 0.43           | 0.41                | 3.80 | 0.55  | 0.50  | 2.72 | 0.71 | -1.38 | ■ | ■  | ■  | 27 |
| (G/B)×(R/B)                            | 0.14           | 0.10                | 4.45 | 0.66  | 0.74  | 3.46 | 0.72 | -2.59 | □ | ■  | ■  | 27 |
| (G/B)×(R/N)                            | 0.51           | 0.49                | 3.80 | 0.48  | 0.49  | 2.82 | 0.53 | -1.20 | ■ | ■  | ■  | 28 |
| (G/B)×(N/B)                            | 0.01           | -0.03               | 2.59 | 0.55  | 0.84  | 2.09 | 1.06 | -1.29 | □ | ■  | ■  | 24 |
| (G/B)×(N/R)                            | 0.52           | 0.51                | 3.42 | 0.52  | 0.44  | 2.77 | 1.03 | -1.47 | ■ | ■  | ■  | 28 |
| (G/R)×(G/N)                            | 0.30           | 0.27                | 2.16 | 0.46  | 0.70  | 1.79 | 0.90 | -0.71 | ■ | ■  | ■  | 25 |
| (G/R)×(N/R)                            | 0.64           | 0.63                | 3.32 | 0.45  | 0.43  | 2.49 | 0.71 | -1.35 | ■ | ■  | ■  | 28 |
| (G/N)×(R/N)                            | 0.58           | 0.56                | 2.59 | 0.41  | 0.42  | 2.07 | 0.74 | -0.84 | ■ | ■  | ■  | 26 |
| (R/B)×(R/G)                            | 0.03           | 0.00                | 5.73 | 0.75  | 0.74  | 4.18 | 0.82 | -2.41 | □ | ■  | ■  | 28 |
| (R/B)×(R/N)                            | 0.56           | 0.55                | 1.58 | 0.38  | 0.40  | 1.29 | 0.66 | -0.43 | ■ | ■  | ■  | 25 |
| (R/B)×(N/B)                            | 0.00           | -0.04               | 2.79 | 0.58  | 0.90  | 2.18 | 0.94 | -1.23 | □ | ■  | ■  | 25 |
| (R/B)×(N/G)                            | 0.22           | 0.19                | 3.00 | 0.58  | 0.76  | 2.66 | 0.91 | -1.17 | ■ | ■  | ■  | 25 |
| (R/G)×(R/N)                            | 0.60           | 0.58                | 2.30 | 0.43  | 0.35  | 2.02 | 0.66 | -0.54 | ■ | ■  | ■  | 26 |
| (R/G)×(N/G)                            | 0.51           | 0.49                | 3.99 | 0.53  | 0.51  | 3.09 | 0.77 | -1.35 | ■ | ■  | ■  | 27 |
| (N/B)×(N/G)                            | 0.54           | 0.53                | 3.73 | 0.50  | 0.48  | 2.99 | 0.60 | -1.33 | ■ | ■  | ■  | 28 |
| (N/B)×(N/R)                            | 0.71           | 0.69                | 3.18 | 0.40  | 0.39  | 2.60 | 0.43 | -0.56 | ■ | ■  | ■  | 25 |
| (N/G)×(N/R)                            | 0.63           | 0.61                | 1.86 | 0.37  | 0.46  | 1.61 | 0.81 | -0.51 | ■ | ■  | ■  | 23 |

(1) Fadel et al., 2016; (2) Patra et al., 2015; (3) Tucker, 1979; (4) Ho et al., 2017; (5) Boucher et al., 2018; (6) Kabbara et al., 2008; (7) Trinh et al., 2017; (8) Alawadi et al., 2010; (9) Mayo et al., 1995; (10) Keith et al., 2018; (11) Chenet et al., 2013; (12) Singh et al., 2014; (13) Guan, 2009.

Kab1 = 1.67-3.94×ln(B)+3.78×ln(G)

NDVI = (N-R)/(N+R)

NRVI = [(R/NIR)-1]/[(R/NIR)+1]

SABI = (N-R)/(B+G)

**OC2=0.1977+(-1.8117(log10(BG)))1+(1.9743(log10(BG)))2+(2.5635(log10(BG)))3+(-0.7218(log10(BG)))4**

**Table S2g.** Chl-*a* retrieval algorithm results summary for OWT-G<sub>h</sub> after outlier removal. Parameters displayed are coefficient of determination ( $r^2$ ), p-value (p), root mean square error (RMSE; ( $\mu\text{g L}^{-1}$ )), root mean square log error (RMSLE), normalized root mean square error, mean absolute error (MAE, ( $\mu\text{g L}^{-1}$ )), median absolute percentage error (MAPE %), bias ( $\mu\text{g L}^{-1}$ ), Breusch-Pagan constant variance (CV), and Shapiro-Wilks normality (NM). Filled boxes indicate that the assumptions of linear regressions have been met ( $r^2 \geq 0.05$ , CV and NM  $p \geq 0.05$ ), empty boxes indicate that the assumptions have not been met.

| Algorithm                 | $r^2$ | Adj. $r^2$ | RMSE | RMLSE | NRMSE | MAE  | MAPE | Bias  | p | CV | NM | n  |
|---------------------------|-------|------------|------|-------|-------|------|------|-------|---|----|----|----|
| B                         | 0.01  | -0.03      | 3.79 | 0.65  | 0.82  | 2.76 | 1.62 | -1.58 | □ | ■  | ■  | 32 |
| G                         | 0.00  | -0.03      | 2.49 | 0.55  | 0.83  | 1.97 | 0.81 | -0.95 | □ | ■  | ■  | 30 |
| R                         | 0.05  | 0.01       | 2.46 | 0.54  | 0.82  | 1.90 | 1.12 | -0.91 | □ | ■  | ■  | 30 |
| N                         | 0.56  | 0.54       | 3.47 | 0.48  | 0.69  | 2.88 | 0.73 | -0.73 | ■ | ■  | ■  | 25 |
| B×G                       | 0.01  | -0.03      | 2.48 | 0.54  | 0.82  | 1.96 | 0.78 | -0.95 | □ | ■  | ■  | 30 |
| B×R                       | 0.03  | 0.00       | 2.45 | 0.53  | 0.81  | 1.93 | 1.02 | -0.92 | □ | ■  | ■  | 30 |
| B×N                       | 0.06  | 0.03       | 3.56 | 0.61  | 0.77  | 2.83 | 0.68 | -1.72 | □ | ■  | ■  | 31 |
| G×R                       | 0.02  | -0.02      | 2.40 | 0.54  | 0.80  | 1.95 | 1.51 | -0.94 | □ | ■  | ■  | 30 |
| G×N                       | 0.07  | 0.03       | 3.42 | 0.59  | 0.74  | 2.71 | 1.17 | -1.64 | □ | ■  | ■  | 31 |
| R×N                       | 0.02  | -0.02      | 3.21 | 0.58  | 0.79  | 2.43 | 0.85 | -1.25 | □ | ■  | ■  | 30 |
| B/G                       | 0.05  | 0.02       | 2.82 | 0.58  | 0.73  | 2.35 | 1.50 | -1.20 | □ | ■  | ■  | 30 |
| B/R                       | 0.01  | -0.02      | 2.48 | 0.52  | 0.82  | 1.98 | 1.12 | -0.77 | □ | ■  | ■  | 28 |
| B/N                       | 0.47  | 0.45       | 3.96 | 0.55  | 0.76  | 3.19 | 1.60 | -2.04 | ■ | ■  | ■  | 24 |
| G/B                       | 0.00  | -0.03      | 3.08 | 0.60  | 0.80  | 2.42 | 0.51 | -1.07 | □ | ■  | ■  | 31 |
| G/R                       | 0.19  | 0.16       | 2.76 | 0.50  | 0.67  | 2.15 | 0.71 | -1.10 | ■ | ■  | ■  | 30 |
| G/N                       | 0.12  | 0.08       | 2.95 | 0.54  | 0.75  | 2.24 | 0.58 | -1.10 | □ | ■  | ■  | 28 |
| R/B                       | 0.03  | 0.00       | 3.01 | 0.58  | 0.74  | 2.30 | 1.59 | -1.60 | □ | ■  | ■  | 31 |
| R/G                       | 0.19  | 0.16       | 2.67 | 0.51  | 0.64  | 2.16 | 1.23 | -1.15 | ■ | ■  | ■  | 29 |
| R/N                       | 0.47  | 0.45       | 2.13 | 0.42  | 0.63  | 1.77 | 1.02 | -0.57 | ■ | ■  | ■  | 23 |
| N/B                       | 0.49  | 0.46       | 3.51 | 0.52  | 0.66  | 3.12 | 1.70 | -1.48 | ■ | ■  | ■  | 22 |
| N/G                       | 0.06  | 0.02       | 3.01 | 0.55  | 0.77  | 2.29 | 1.00 | -1.09 | □ | ■  | ■  | 28 |
| N/R                       | 0.35  | 0.33       | 2.22 | 0.45  | 0.71  | 1.75 | 0.96 | -0.66 | ■ | ■  | ■  | 27 |
| B×G×R <sup>1</sup>        | 0.02  | -0.02      | 2.41 | 0.54  | 0.80  | 1.95 | 0.78 | -0.94 | □ | ■  | ■  | 30 |
| B×G×N <sup>1</sup>        | 0.03  | 0.00       | 3.80 | 0.63  | 0.82  | 2.83 | 0.89 | -1.20 | □ | ■  | ■  | 31 |
| B×R×N <sup>1</sup>        | 0.00  | -0.04      | 2.99 | 0.58  | 0.73  | 2.42 | 1.45 | -1.29 | □ | ■  | ■  | 29 |
| G×R×N <sup>1</sup>        | 0.02  | -0.02      | 2.44 | 0.53  | 0.81  | 1.98 | 1.97 | -0.83 | □ | ■  | ■  | 29 |
| Avg(B;G) <sup>1,2</sup>   | 0.03  | 0.00       | 2.43 | 0.53  | 0.80  | 1.91 | 1.43 | -0.96 | □ | ■  | ■  | 29 |
| Avg(B;R) <sup>1,2</sup>   | 0.04  | 0.01       | 3.04 | 0.56  | 0.75  | 2.34 | 1.10 | -1.19 | □ | ■  | ■  | 31 |
| Avg(B;N) <sup>1,2</sup>   | 0.02  | -0.01      | 3.87 | 0.64  | 0.84  | 2.84 | 1.51 | -1.55 | □ | ■  | ■  | 31 |
| Avg(G;R) <sup>1,2</sup>   | 0.02  | -0.02      | 2.29 | 0.53  | 0.76  | 1.95 | 0.90 | -0.94 | □ | ■  | ■  | 30 |
| Avg(G;N) <sup>1,2</sup>   | 0.15  | 0.11       | 2.29 | 0.49  | 0.74  | 1.88 | 0.94 | -0.84 | ■ | ■  | ■  | 27 |
| Avg(R;N) <sup>1,2</sup>   | 0.11  | 0.07       | 2.82 | 0.54  | 0.68  | 2.37 | 1.29 | -1.16 | □ | ■  | ■  | 28 |
| N-R <sup>3,4</sup>        | 0.24  | 0.22       | 3.03 | 0.53  | 0.78  | 2.27 | 0.90 | -1.07 | ■ | ■  | ■  | 29 |
| Kab1 <sup>5,6</sup>       | 0.03  | 0.00       | 3.04 | 0.58  | 0.78  | 2.36 | 1.05 | -1.22 | □ | ■  | ■  | 30 |
| NDVI                      | 0.43  | 0.40       | 2.23 | 0.45  | 0.69  | 1.87 | 1.02 | -0.54 | ■ | ■  | ■  | 25 |
| NRVI                      | 0.43  | 0.40       | 2.28 | 0.44  | 0.71  | 1.85 | 1.12 | -0.83 | ■ | ■  | ■  | 25 |
| OC2 <sup>7</sup>          | 0.02  | -0.02      | 3.07 | 0.59  | 0.80  | 2.34 | 1.29 | -0.94 | □ | ■  | ■  | 31 |
| SAB1 <sup>5,8</sup>       | 0.14  | 0.11       | 3.04 | 0.56  | 0.79  | 2.29 | 0.82 | -1.08 | ■ | ■  | ■  | 30 |
| (B-R)/G <sup>4,9</sup>    | 0.01  | -0.03      | 2.19 | 0.50  | 0.72  | 1.97 | 0.89 | -0.97 | □ | ■  | ■  | 29 |
| (N/G)+(N/B) <sup>10</sup> | 0.23  | 0.20       | 3.77 | 0.59  | 0.79  | 2.90 | 0.47 | -1.75 | ■ | ■  | ■  | 29 |
| G×(B+G+R)                 | 0.01  | -0.03      | 2.46 | 0.54  | 0.82  | 1.96 | 0.96 | -0.95 | □ | ■  | ■  | 30 |

| Algorithm                              | r <sup>2</sup> | Adj. r <sup>2</sup> | RMSE | RMLSE | NRMSE | MAE  | MAPE | Bias  | p | CV | NM | n  |
|----------------------------------------|----------------|---------------------|------|-------|-------|------|------|-------|---|----|----|----|
| [(1/B)-(1/G)]×N <sup>10</sup>          | 0.00           | -0.03               | 3.00 | 0.58  | 0.78  | 2.28 | 1.62 | -0.79 | □ | ■  | ■  | 31 |
| [(1/R)-(1/G)]×N <sup>10</sup>          | 0.31           | 0.28                | 2.21 | 0.47  | 0.73  | 1.72 | 0.55 | -0.81 | ■ | ■  | ■  | 29 |
| [(1/R)-(1/B)]×N <sup>10</sup>          | 0.17           | 0.14                | 2.30 | 0.49  | 0.75  | 1.82 | 0.75 | -0.82 | ■ | ■  | ■  | 29 |
| [(1/R)-(0.2363×(1/G))]×N <sup>11</sup> | 0.37           | 0.35                | 2.31 | 0.43  | 0.74  | 1.84 | 1.05 | -0.52 | ■ | ■  | ■  | 27 |
| [(1/R)-(1/B)]/N <sup>12</sup>          | 0.02           | -0.01               | 3.28 | 0.58  | 0.79  | 2.48 | 0.85 | -1.27 | □ | ■  | ■  | 28 |
| (B/R)×N                                | 0.03           | -0.01               | 3.69 | 0.61  | 0.80  | 2.78 | 0.85 | -1.44 | □ | ■  | ■  | 31 |
| (G/R)×N                                | 0.33           | 0.30                | 3.52 | 0.52  | 0.74  | 2.60 | 1.99 | -1.23 | ■ | ■  | ■  | 29 |
| (R/B)×N                                | 0.16           | 0.13                | 3.94 | 0.63  | 0.82  | 3.03 | 4.02 | -1.66 | ■ | ■  | ■  | 28 |
| (R/G)×N                                | 0.22           | 0.19                | 3.76 | 0.58  | 0.80  | 2.89 | 0.71 | -1.25 | ■ | ■  | ■  | 29 |
| (R×N)/B <sup>13</sup>                  | 0.16           | 0.13                | 3.77 | 0.61  | 0.78  | 2.75 | 0.88 | -1.29 | ■ | ■  | ■  | 28 |
| (B/G)×(B/R)                            | 0.01           | -0.03               | 2.34 | 0.51  | 0.77  | 1.97 | 1.21 | -0.85 | □ | ■  | ■  | 29 |
| (B/G)×(B/N)                            | 0.39           | 0.37                | 3.80 | 0.56  | 0.75  | 2.85 | 1.18 | -1.44 | ■ | ■  | ■  | 25 |
| (B/G)×(R/G)                            | 0.02           | -0.01               | 2.16 | 0.49  | 0.70  | 1.73 | 1.84 | -0.80 | □ | ■  | ■  | 28 |
| (B/G)×(R/N)                            | 0.69           | 0.68                | 1.61 | 0.33  | 0.46  | 1.35 | 1.10 | -0.26 | ■ | ■  | ■  | 21 |
| (B/G)×(N/B)                            | 0.06           | 0.02                | 3.04 | 0.57  | 0.78  | 2.32 | 0.78 | -1.00 | □ | ■  | ■  | 28 |
| (B/G)×(N/G)                            | 0.17           | 0.13                | 2.05 | 0.47  | 0.79  | 1.81 | 1.67 | -0.94 | ■ | ■  | ■  | 24 |
| (B/G)×(N/R)                            | 0.12           | 0.09                | 2.31 | 0.49  | 0.75  | 1.85 | 0.96 | -0.83 | □ | ■  | ■  | 29 |
| (B/R)×(B/N)                            | 0.18           | 0.15                | 3.71 | 0.58  | 0.77  | 2.70 | 1.19 | -1.21 | ■ | ■  | ■  | 28 |
| (B/R)×(G/R)                            | 0.07           | 0.04                | 3.15 | 0.57  | 0.77  | 2.33 | 1.69 | -1.12 | □ | ■  | ■  | 29 |
| (B/R)×(G/N)                            | 0.20           | 0.17                | 3.37 | 0.57  | 0.70  | 2.80 | 1.40 | -1.35 | ■ | ■  | ■  | 28 |
| (B/R)×(N/R)                            | 0.21           | 0.18                | 2.29 | 0.48  | 0.75  | 1.75 | 1.12 | -0.82 | ■ | ■  | ■  | 29 |
| (B/N)×(G/N)                            | 0.27           | 0.24                | 2.87 | 0.52  | 0.69  | 2.48 | 0.99 | -1.25 | ■ | ■  | ■  | 25 |
| (B/N)×(R/N)                            | 0.26           | 0.23                | 3.03 | 0.54  | 0.74  | 2.32 | 1.11 | -1.19 | ■ | ■  | ■  | 26 |
| (G/B)×(G/R)                            | 0.00           | -0.03               | 2.21 | 0.51  | 0.72  | 1.83 | 1.12 | -0.79 | □ | ■  | ■  | 29 |
| (G/B)×(G/N)                            | 0.07           | 0.03                | 2.34 | 0.51  | 0.77  | 1.93 | 0.95 | -0.92 | □ | ■  | ■  | 28 |
| (G/B)×(R/B)                            | 0.01           | -0.03               | 3.80 | 0.64  | 0.82  | 2.78 | 1.50 | -1.55 | □ | ■  | ■  | 32 |
| (G/B)×(R/N)                            | 0.05           | 0.02                | 2.46 | 0.53  | 0.82  | 1.93 | 1.18 | -0.91 | □ | ■  | ■  | 30 |
| (G/B)×(N/B)                            | 0.28           | 0.25                | 3.85 | 0.57  | 0.78  | 2.88 | 1.00 | -1.19 | ■ | ■  | ■  | 27 |
| (G/B)×(N/R)                            | 0.63           | 0.61                | 1.88 | 0.36  | 0.55  | 1.53 | 1.03 | -0.31 | ■ | ■  | ■  | 22 |
| (G/R)×(G/N)                            | 0.05           | 0.02                | 3.03 | 0.57  | 0.78  | 2.34 | 0.86 | -1.16 | □ | ■  | ■  | 29 |
| (G/R)×(N/R)                            | 0.30           | 0.27                | 2.05 | 0.44  | 0.67  | 1.71 | 1.02 | -0.68 | ■ | ■  | ■  | 29 |
| (G/N)×(R/N)                            | 0.26           | 0.23                | 2.34 | 0.47  | 0.74  | 1.84 | 0.85 | -0.67 | ■ | ■  | ■  | 26 |
| (R/B)×(R/G)                            | 0.05           | 0.01                | 2.78 | 0.53  | 0.67  | 2.37 | 2.24 | -1.11 | □ | ■  | ■  | 28 |
| (R/B)×(R/N)                            | 0.14           | 0.11                | 2.35 | 0.51  | 0.78  | 1.82 | 1.01 | -0.82 | ■ | ■  | ■  | 30 |
| (R/B)×(N/B)                            | 0.01           | -0.03               | 3.77 | 0.62  | 0.80  | 2.83 | 0.84 | -1.56 | □ | ■  | ■  | 30 |
| (R/B)×(N/G)                            | 0.14           | 0.10                | 3.78 | 0.60  | 0.78  | 2.97 | 1.06 | -1.27 | □ | ■  | ■  | 27 |
| (R/G)×(R/N)                            | 0.26           | 0.23                | 2.25 | 0.48  | 0.75  | 1.81 | 0.81 | -0.73 | ■ | ■  | ■  | 30 |
| (R/G)×(N/G)                            | 0.02           | -0.02               | 2.98 | 0.55  | 0.76  | 2.26 | 1.84 | -1.15 | □ | ■  | ■  | 28 |
| (N/B)×(N/G)                            | 0.24           | 0.21                | 3.49 | 0.57  | 0.71  | 2.97 | 1.73 | -1.09 | ■ | ■  | ■  | 26 |
| (N/B)×(N/R)                            | 0.24           | 0.21                | 3.74 | 0.59  | 0.78  | 2.90 | 1.14 | -1.32 | ■ | ■  | ■  | 29 |
| (N/G)×(N/R)                            | 0.11           | 0.08                | 3.00 | 0.54  | 0.78  | 2.30 | 1.19 | -1.11 | □ | ■  | ■  | 30 |

(1) Fadel et al., 2016; (2) Patra et al., 2015; (3) Tucker, 1979; (4) Ho et al., 2017; (5) Boucher et al., 2018; (6) Kabbara et al., 2008; (7) Trinh et al., 2017; (8) Alawadi et al., 2010; (9) Mayo et al., 1995; (10) Keith et al., 2018; (11) Chenet et al., 2013; (12) Singh et al., 2014; (13) Guan, 2009.

Kab1 = 1.67-3.94×ln(B)+3.78×ln(G)

NDVI = (N-R)/(N+R)

NRVI = [(R/NIR)-1]/[(R/NIR)+1]

SABI = (N-R)/(B+G)

**OC2=0.1977+(-1.8117(log10(BG)))1+(1.9743(log10(BG)))2+(2.5635(log10(BG)))3+(-0.7218(log10(BG)))4**

**Table S3a.** Chl-*a* retrieval algorithm results summary for OWT-A<sub>q</sub> after outlier removal. Parameters displayed are coefficient of determination ( $r^2$ ), p-value (p), root mean square error (RMSE; ( $\mu\text{g L}^{-1}$ )), root mean square log error (RMSLE), normalized root mean square error, mean absolute error (MAE, ( $\mu\text{g L}^{-1}$ )), median absolute percentage error (MAPE %), bias ( $\mu\text{g L}^{-1}$ ), Breusch-Pagan constant variance (CV), and Shapiro-Wilks normality (NM). Filled boxes indicate that the assumptions of linear regressions have been met ( $r^2 \geq 0.05$ , CV and NM  $p \geq 0.05$ ), empty boxes indicate that the assumptions have not been met.

| Algorithm                 | $r^2$ | Adj. $r^2$ | RMSE | RMLSE | NRMSE | MAE  | MAPE | Bias  | p | CV | NM | n  |
|---------------------------|-------|------------|------|-------|-------|------|------|-------|---|----|----|----|
| B                         | 0.01  | -0.12      | 6.82 | 0.62  | 0.69  | 6.82 | 0.37 | -3.03 | □ | ■  | □  | 10 |
| G                         | 0.01  | -0.11      | 6.82 | 0.62  | 0.69  | 6.82 | 0.37 | -3.03 | □ | ■  | □  | 10 |
| R                         | 0.20  | 0.08       | NA   | NA    | NA    | NA   | 0.34 | -2.71 | □ | ■  | ■  | 9  |
| N                         | 0.66  | 0.59       | NA   | NA    | NA    | NA   | 0.24 | -1.55 | ■ | ■  | ■  | 7  |
| B×G                       | 0.01  | -0.11      | 6.81 | 0.62  | 0.69  | 6.81 | 0.37 | -3.02 | □ | ■  | □  | 10 |
| B×R                       | 0.03  | -0.09      | 6.75 | 0.61  | 0.69  | 6.75 | 0.37 | -2.98 | □ | ■  | □  | 10 |
| B×N                       | 0.49  | 0.40       | NA   | NA    | NA    | NA   | 0.27 | -2.18 | □ | ■  | ■  | 8  |
| G×R                       | 0.03  | -0.09      | 6.74 | 0.61  | 0.69  | 6.74 | 0.37 | -2.98 | □ | ■  | ■  | 10 |
| G×N                       | 0.62  | 0.53       | NA   | NA    | NA    | NA   | 0.20 | -1.30 | □ | ■  | ■  | 6  |
| R×N                       | 0.62  | 0.56       | NA   | NA    | NA    | NA   | 0.20 | -1.42 | ■ | ■  | ■  | 8  |
| B/G                       | 0.00  | -0.12      | 6.82 | 0.62  | 0.69  | 6.82 | 0.37 | -3.04 | □ | ■  | □  | 10 |
| B/R                       | 0.04  | -0.08      | 6.74 | 0.61  | 0.69  | 6.74 | 0.38 | -2.96 | □ | ■  | ■  | 10 |
| B/N                       | 0.01  | -0.12      | 6.73 | 0.61  | 0.68  | 6.73 | 0.37 | -3.03 | □ | ■  | □  | 10 |
| G/B                       | 0.00  | -0.12      | 6.81 | 0.62  | 0.69  | 6.81 | 0.37 | -3.05 | □ | ■  | □  | 10 |
| G/R                       | 0.37  | 0.27       | NA   | NA    | NA    | NA   | 0.33 | -2.47 | □ | ■  | ■  | 8  |
| G/N                       | 0.01  | -0.12      | 6.73 | 0.61  | 0.68  | 6.73 | 0.37 | -3.03 | □ | ■  | □  | 10 |
| R/B                       | 0.03  | -0.09      | 6.77 | 0.62  | 0.69  | 6.77 | 0.38 | -2.98 | □ | ■  | ■  | 10 |
| R/G                       | 0.06  | -0.06      | 6.72 | 0.61  | 0.68  | 6.72 | 0.38 | -2.93 | □ | □  | ■  | 10 |
| R/N                       | 0.00  | -0.16      | NA   | NA    | NA    | NA   | 0.23 | -1.88 | □ | ■  | □  | 8  |
| N/B                       | 0.00  | -0.12      | 6.77 | 0.61  | 0.69  | 6.77 | 0.37 | -3.04 | □ | ■  | □  | 10 |
| N/G                       | 0.00  | -0.12      | 6.75 | 0.61  | 0.69  | 6.75 | 0.37 | -3.04 | □ | ■  | □  | 10 |
| N/R                       | 0.00  | -0.17      | NA   | NA    | NA    | NA   | 0.23 | -1.88 | □ | ■  | □  | 8  |
| B×G×R <sup>1</sup>        | 0.03  | -0.09      | 6.76 | 0.61  | 0.69  | 6.76 | 0.37 | -2.99 | □ | ■  | □  | 10 |
| B×G×N <sup>1</sup>        | 0.04  | -0.08      | 6.71 | 0.60  | 0.68  | 6.71 | 0.36 | -2.95 | □ | ■  | ■  | 10 |
| B×R×N <sup>1</sup>        | 0.26  | 0.13       | NA   | NA    | NA    | NA   | 0.31 | -2.69 | □ | ■  | ■  | 8  |
| G×R×N <sup>1</sup>        | 0.06  | -0.05      | 6.64 | 0.59  | 0.68  | 6.64 | 0.36 | -2.92 | □ | ■  | ■  | 10 |
| Avg(B;G) <sup>1,2</sup>   | 0.01  | -0.12      | 6.82 | 0.62  | 0.69  | 6.82 | 0.37 | -3.03 | □ | ■  | □  | 10 |
| Avg(B;R) <sup>1,2</sup>   | 0.03  | -0.09      | 6.75 | 0.61  | 0.69  | 6.75 | 0.37 | -2.98 | □ | ■  | □  | 10 |
| Avg(B;N) <sup>1,2</sup>   | 0.44  | 0.34       | NA   | NA    | NA    | NA   | 0.28 | -2.24 | □ | ■  | ■  | 8  |
| Avg(G;R) <sup>1,2</sup>   | 0.03  | -0.09      | 6.75 | 0.61  | 0.69  | 6.75 | 0.37 | -2.99 | □ | ■  | □  | 10 |
| Avg(G;N) <sup>1,2</sup>   | 0.17  | 0.05       | NA   | NA    | NA    | NA   | 0.33 | -2.75 | □ | ■  | ■  | 9  |
| Avg(R;N) <sup>1,2</sup>   | 0.82  | 0.78       | NA   | NA    | NA    | NA   | 0.17 | -0.91 | ■ | ■  | ■  | 7  |
| N-R <sup>3,4</sup>        | 0.14  | -0.01      | NA   | NA    | NA    | NA   | 0.27 | -2.10 | □ | ■  | ■  | 8  |
| Kab1 <sup>5,6</sup>       | 0.00  | -0.12      | 6.82 | 0.62  | 0.69  | 6.82 | 0.37 | -3.04 | □ | ■  | □  | 10 |
| NDVI                      | 0.00  | -0.17      | NA   | NA    | NA    | NA   | 0.23 | -1.88 | □ | ■  | □  | 8  |
| NRVI                      | 0.00  | -0.17      | NA   | NA    | NA    | NA   | 0.23 | -1.88 | □ | ■  | □  | 8  |
| OC2 <sup>7</sup>          | 0.00  | -0.12      | 6.81 | 0.62  | 0.69  | 6.81 | 0.37 | -3.05 | □ | ■  | □  | 10 |
| SAB1 <sup>5,8</sup>       | 0.58  | 0.44       | NA   | NA    | NA    | NA   | 0.09 | -0.05 | □ | ■  | ■  | 5  |
| (B-R)/G <sup>4,9</sup>    | 0.01  | -0.16      | NA   | NA    | NA    | NA   | 0.29 | -2.20 | □ | ■  | □  | 8  |
| (N/G)+(N/B) <sup>10</sup> | 0.00  | -0.12      | 6.76 | 0.61  | 0.69  | 6.76 | 0.37 | -3.04 | □ | ■  | □  | 10 |
| G×(B+G+R)                 | 0.02  | -0.10      | 6.79 | 0.62  | 0.69  | 6.79 | 0.37 | -3.01 | □ | ■  | □  | 10 |

| Algorithm                              | r <sup>2</sup> | Adj. r <sup>2</sup> | RMSE | RMLSE | NRMSE | MAE  | MAPE | Bias  | p | CV | NM | n  |
|----------------------------------------|----------------|---------------------|------|-------|-------|------|------|-------|---|----|----|----|
| [(1/B)-(1/G)]×N <sup>10</sup>          | 0.00           | -0.12               | 6.81 | 0.62  | 0.69  | 6.81 | 0.37 | -3.05 | □ | ■  | □  | 10 |
| [(1/R)-(1/G)]×N <sup>10</sup>          | 0.68           | 0.51                | NA   | NA    | NA    | NA   | 0.04 | -0.01 | □ | ■  | ■  | 4  |
| [(1/R)-(1/B)]×N <sup>10</sup>          | 0.13           | -0.04               | NA   | NA    | NA    | NA   | 0.31 | -2.37 | □ | ■  | ■  | 7  |
| [(1/R)-(0.2363×(1/G))]×N <sup>11</sup> | 0.00           | -0.17               | NA   | NA    | NA    | NA   | 0.23 | -1.88 | □ | ■  | □  | 8  |
| [(1/R)-(1/B)]/N <sup>12</sup>          | 0.18           | 0.02                | NA   | NA    | NA    | NA   | 0.29 | -2.27 | □ | ■  | ■  | 7  |
| (B/R)×N                                | 0.00           | -0.12               | 6.77 | 0.61  | 0.69  | 6.77 | 0.37 | -3.04 | □ | ■  | □  | 10 |
| (G/R)×N                                | 0.07           | -0.07               | NA   | NA    | NA    | NA   | 0.27 | -2.02 | □ | ■  | □  | 9  |
| (R/B)×N                                | 0.06           | -0.06               | 6.68 | 0.61  | 0.68  | 6.68 | 0.38 | -2.93 | □ | ■  | ■  | 10 |
| (R/G)×N                                | 0.91           | 0.87                | NA   | NA    | NA    | NA   | 0.11 | -0.39 | ■ | ■  | ■  | 5  |
| (R×N)/B <sup>13</sup>                  | 0.06           | -0.06               | 6.68 | 0.61  | 0.68  | 6.68 | 0.38 | -2.93 | □ | ■  | ■  | 10 |
| (B/G)×(B/R)                            | 0.02           | -0.12               | NA   | NA    | NA    | NA   | 0.29 | -2.05 | □ | ■  | □  | 9  |
| (B/G)×(B/N)                            | 0.24           | 0.11                | NA   | NA    | NA    | NA   | 0.26 | -1.99 | □ | ■  | ■  | 8  |
| (B/G)×(R/G)                            | 0.01           | -0.19               | NA   | NA    | NA    | NA   | 0.19 | -0.73 | □ | ■  | □  | 7  |
| (B/G)×(R/N)                            | 0.00           | -0.17               | NA   | NA    | NA    | NA   | 0.23 | -1.88 | □ | ■  | □  | 8  |
| (B/G)×(N/B)                            | 0.00           | -0.12               | 6.75 | 0.61  | 0.69  | 6.75 | 0.37 | -3.04 | □ | ■  | □  | 10 |
| (B/G)×(N/G)                            | 0.01           | -0.12               | 6.72 | 0.61  | 0.68  | 6.72 | 0.37 | -3.03 | □ | ■  | □  | 10 |
| (B/G)×(N/R)                            | 0.03           | -0.11               | NA   | NA    | NA    | NA   | 0.28 | -2.08 | □ | ■  | □  | 9  |
| (B/R)×(B/N)                            | 0.02           | -0.10               | 6.67 | 0.60  | 0.68  | 6.67 | 0.37 | -3.00 | □ | ■  | ■  | 10 |
| (B/R)×(G/R)                            | 0.06           | -0.06               | 6.69 | 0.61  | 0.68  | 6.69 | 0.38 | -2.92 | □ | □  | ■  | 10 |
| (B/R)×(G/N)                            | 0.03           | -0.10               | 6.67 | 0.60  | 0.68  | 6.67 | 0.37 | -2.99 | □ | ■  | ■  | 10 |
| (B/R)×(N/R)                            | 0.84           | 0.78                | NA   | NA    | NA    | NA   | 0.05 | -0.01 | ■ | ■  | □  | 5  |
| (B/N)×(G/N)                            | 0.01           | -0.12               | 6.70 | 0.61  | 0.68  | 6.70 | 0.37 | -3.03 | □ | ■  | □  | 10 |
| (B/N)×(R/N)                            | 0.00           | -0.17               | NA   | NA    | NA    | NA   | 0.24 | -1.88 | □ | ■  | □  | 8  |
| (G/B)×(G/R)                            | 0.55           | 0.10                | NA   | NA    | NA    | NA   | 0.03 | 0.00  | □ | ■  | ■  | 3  |
| (G/B)×(G/N)                            | 0.00           | -0.12               | 6.74 | 0.61  | 0.69  | 6.74 | 0.37 | -3.04 | □ | ■  | □  | 10 |
| (G/B)×(R/B)                            | 0.02           | -0.10               | 6.76 | 0.61  | 0.69  | 6.76 | 0.37 | -3.01 | □ | ■  | ■  | 10 |
| (G/B)×(R/N)                            | 0.09           | -0.04               | NA   | NA    | NA    | NA   | 0.34 | -2.86 | □ | ■  | ■  | 9  |
| (G/B)×(N/B)                            | 0.00           | -0.12               | 6.79 | 0.62  | 0.69  | 6.79 | 0.37 | -3.04 | □ | ■  | □  | 10 |
| (G/B)×(N/R)                            | 0.09           | -0.04               | NA   | NA    | NA    | NA   | 0.29 | -1.99 | □ | ■  | ■  | 9  |
| (G/R)×(G/N)                            | 0.03           | -0.09               | 6.66 | 0.60  | 0.68  | 6.66 | 0.37 | -2.98 | □ | ■  | ■  | 10 |
| (G/R)×(N/R)                            | 0.65           | 0.57                | NA   | NA    | NA    | NA   | 0.08 | -0.03 | □ | ■  | ■  | 6  |
| (G/N)×(R/N)                            | 0.06           | -0.07               | NA   | NA    | NA    | NA   | 0.32 | -2.92 | □ | ■  | □  | 9  |
| (R/B)×(R/G)                            | 0.06           | -0.07               | NA   | NA    | NA    | NA   | 0.39 | -3.22 | □ | □  | ■  | 9  |
| (R/B)×(R/N)                            | 0.02           | -0.10               | 6.72 | 0.61  | 0.68  | 6.72 | 0.37 | -3.00 | □ | ■  | ■  | 10 |
| (R/B)×(N/B)                            | 0.01           | -0.11               | 6.73 | 0.61  | 0.68  | 6.73 | 0.37 | -3.02 | □ | ■  | □  | 10 |
| (R/B)×(N/G)                            | 0.02           | -0.11               | 6.74 | 0.61  | 0.69  | 6.74 | 0.37 | -3.01 | □ | ■  | □  | 10 |
| (R/G)×(R/N)                            | 0.65           | 0.56                | NA   | NA    | NA    | NA   | 0.08 | -0.03 | □ | ■  | ■  | 6  |
| (R/G)×(N/G)                            | 0.02           | -0.10               | 6.74 | 0.61  | 0.69  | 6.74 | 0.37 | -3.00 | □ | ■  | ■  | 10 |
| (N/B)×(N/G)                            | 0.00           | -0.12               | 6.77 | 0.61  | 0.69  | 6.77 | 0.37 | -3.04 | □ | ■  | □  | 10 |
| (N/B)×(N/R)                            | 0.07           | -0.07               | NA   | NA    | NA    | NA   | 0.31 | -2.03 | □ | ■  | ■  | 9  |
| (N/G)×(N/R)                            | 0.06           | -0.07               | NA   | NA    | NA    | NA   | 0.30 | -2.03 | □ | ■  | ■  | 9  |

(1) Fadel et al., 2016; (2) Patra et al., 2015; (3) Tucker, 1979; (4) Ho et al., 2017; (5) Boucher et al., 2018; (6) Kabbara et al., 2008; (7) Trinh et al., 2017; (8) Alawadi et al., 2010; (9) Mayo et al., 1995; (10) Keith et al., 2018; (11) Chenet et al., 2013; (12) Singh et al., 2014; (13) Guan, 2009.

Kab1 = 1.67-3.94×ln(B)+3.78×ln(G)

NDVI = (N-R)/(N+R)

NRVI = [(R/NIR)-1]/[(R/NIR)+1]

SABI = (N-R)/(B+G)

**OC2=0.1977+(-1.8117(log10(BG)))1+(1.9743(log10(BG)))2+(2.5635(log10(BG)))3+(-0.7218(log10(BG)))4**

**Table S3b.** Chl-*a* retrieval algorithm results summary for OWT-B<sub>q</sub> after outlier removal. Parameters displayed are coefficient of determination ( $r^2$ ), p-value (p), root mean square error (RMSE; ( $\mu\text{g L}^{-1}$ )), root mean square log error (RMSLE), normalized root mean square error, mean absolute error (MAE, ( $\mu\text{g L}^{-1}$ )), median absolute percentage error (MAPE %), bias ( $\mu\text{g L}^{-1}$ ), Breusch-Pagan constant variance (CV), and Shapiro-Wilks normality (NM). Filled boxes indicate that the assumptions of linear regressions have been met ( $r^2 \geq 0.05$ , CV and NM  $p \geq 0.05$ ), empty boxes indicate that the assumptions have not been met.

| Algorithm                 | $r^2$ | Adj. $r^2$ | RMSE  | RMLSE | NRMSE | MAE   | MAPE | Bias   | p | CV | NM | n  |
|---------------------------|-------|------------|-------|-------|-------|-------|------|--------|---|----|----|----|
| B                         | 0.00  | -0.03      | 23.24 | 0.82  | 1.01  | 19.54 | 0.16 | -7.17  | □ | ■  | □  | 31 |
| G                         | 0.10  | 0.08       | 23.50 | 0.83  | 0.96  | 19.48 | 0.24 | -12.25 | □ | ■  | ■  | 34 |
| R                         | 0.08  | 0.05       | 23.25 | 0.80  | 0.95  | 19.10 | 0.18 | -9.70  | □ | ■  | ■  | 33 |
| N                         | 0.13  | 0.10       | 27.04 | 0.82  | 0.80  | 21.33 | 0.24 | -8.92  | ■ | ■  | ■  | 32 |
| B×G                       | 0.02  | -0.01      | 21.87 | 0.83  | 0.93  | 18.55 | 0.25 | -9.32  | □ | ■  | □  | 33 |
| B×R                       | 0.00  | -0.03      | 25.40 | 0.96  | 1.02  | 21.69 | 0.40 | -10.52 | □ | ■  | □  | 35 |
| B×N                       | 0.23  | 0.20       | 22.77 | 0.76  | 0.93  | 19.19 | 0.22 | -6.74  | ■ | ■  | ■  | 32 |
| G×R                       | 0.11  | 0.08       | 22.12 | 0.79  | 0.90  | 18.84 | 0.20 | -8.17  | □ | ■  | ■  | 34 |
| G×N                       | 0.00  | -0.03      | 23.96 | 0.87  | 0.97  | 20.56 | 0.28 | -10.46 | □ | ■  | □  | 34 |
| R×N                       | 0.00  | -0.03      | 23.87 | 0.88  | 0.97  | 20.85 | 0.31 | -9.00  | □ | ■  | □  | 34 |
| B/G                       | 0.85  | 0.84       | 11.83 | 0.34  | 0.53  | 10.07 | 0.12 | -1.55  | ■ | ■  | ■  | 26 |
| B/R                       | 0.27  | 0.25       | 24.20 | 0.71  | 0.72  | 21.12 | 0.22 | -10.97 | ■ | □  | ■  | 34 |
| B/N                       | 0.08  | 0.05       | 26.94 | 0.79  | 0.80  | 21.84 | 0.25 | -14.14 | □ | ■  | ■  | 32 |
| G/B                       | 0.34  | 0.32       | 25.52 | 0.73  | 0.76  | 20.17 | 0.22 | -8.78  | ■ | □  | ■  | 34 |
| G/R                       | 0.34  | 0.32       | 19.94 | 0.67  | 0.59  | 17.09 | 0.19 | -8.16  | ■ | ■  | ■  | 31 |
| G/N                       | 0.34  | 0.32       | 26.89 | 0.72  | 0.79  | 21.19 | 0.20 | -6.98  | ■ | ■  | ■  | 31 |
| R/B                       | 0.23  | 0.21       | 27.42 | 0.77  | 0.82  | 20.67 | 0.19 | -7.62  | ■ | □  | ■  | 34 |
| R/G                       | 0.36  | 0.33       | 25.10 | 0.74  | 0.74  | 18.40 | 0.18 | -9.24  | ■ | ■  | ■  | 31 |
| R/N                       | 0.26  | 0.23       | 27.01 | 0.78  | 0.79  | 21.89 | 0.16 | -10.74 | ■ | ■  | ■  | 32 |
| N/B                       | 0.08  | 0.05       | 28.19 | 0.85  | 0.84  | 22.22 | 0.25 | -9.97  | □ | ■  | ■  | 32 |
| N/G                       | 0.42  | 0.40       | 27.46 | 0.69  | 0.80  | 21.84 | 0.23 | -7.75  | ■ | ■  | ■  | 30 |
| N/R                       | 0.27  | 0.24       | 24.23 | 0.73  | 0.71  | 21.23 | 0.17 | -8.16  | ■ | ■  | ■  | 33 |
| B×G×R <sup>1</sup>        | 0.02  | -0.01      | 23.74 | 0.93  | 0.96  | 19.48 | 0.32 | -11.28 | □ | ■  | □  | 35 |
| B×G×N <sup>1</sup>        | 0.02  | -0.01      | 25.50 | 0.95  | 1.01  | 21.36 | 0.35 | -9.93  | □ | ■  | □  | 34 |
| B×R×N <sup>1</sup>        | 0.04  | 0.01       | 23.64 | 0.82  | 0.95  | 20.53 | 0.26 | -10.98 | □ | ■  | □  | 33 |
| G×R×N <sup>1</sup>        | 0.02  | -0.01      | 24.19 | 0.89  | 0.98  | 21.15 | 0.28 | -11.34 | □ | ■  | □  | 34 |
| Avg(B;G) <sup>1,2</sup>   | 0.02  | -0.01      | 22.50 | 0.82  | 0.96  | 18.86 | 0.25 | -10.61 | □ | ■  | □  | 33 |
| Avg(B;R) <sup>1,2</sup>   | 0.00  | -0.03      | 24.33 | 0.89  | 0.99  | 20.59 | 0.20 | -9.01  | □ | ■  | □  | 33 |
| Avg(B;N) <sup>1,2</sup>   | 0.22  | 0.19       | 22.69 | 0.78  | 0.92  | 19.51 | 0.23 | -6.43  | ■ | ■  | ■  | 32 |
| Avg(G;R) <sup>1,2</sup>   | 0.13  | 0.10       | 23.52 | 0.78  | 0.96  | 18.80 | 0.18 | -8.91  | ■ | ■  | ■  | 33 |
| Avg(G;N) <sup>1,2</sup>   | 0.01  | -0.03      | 24.08 | 0.88  | 0.98  | 19.93 | 0.21 | -8.30  | □ | ■  | □  | 34 |
| Avg(R;N) <sup>1,2</sup>   | 0.00  | -0.03      | 23.82 | 0.87  | 0.97  | 20.21 | 0.31 | -9.55  | □ | ■  | □  | 34 |
| N-R <sup>3,4</sup>        | 0.34  | 0.32       | 24.10 | 0.72  | 0.71  | 19.21 | 0.19 | -8.24  | ■ | ■  | ■  | 31 |
| KabI <sup>5,6</sup>       | 0.84  | 0.84       | 12.11 | 0.33  | 0.53  | 9.92  | 0.12 | -1.28  | ■ | ■  | ■  | 25 |
| NDVI                      | 0.26  | 0.24       | 27.03 | 0.77  | 0.80  | 21.47 | 0.19 | -8.07  | ■ | ■  | ■  | 33 |
| NRVI                      | 0.26  | 0.24       | 25.94 | 0.74  | 0.77  | 20.46 | 0.19 | -8.55  | ■ | ■  | ■  | 33 |
| OC2 <sup>7</sup>          | 0.33  | 0.31       | 25.84 | 0.72  | 0.77  | 20.27 | 0.19 | -7.27  | ■ | □  | ■  | 34 |
| SABl <sup>5,8</sup>       | 0.47  | 0.45       | 25.20 | 0.64  | 0.74  | 19.92 | 0.15 | -5.00  | ■ | ■  | ■  | 28 |
| (B-R)/G <sup>4,9</sup>    | 0.83  | 0.82       | 12.68 | 0.35  | 0.57  | 10.47 | 0.12 | -2.02  | ■ | ■  | ■  | 26 |
| (N/G)+(N/B) <sup>10</sup> | 0.23  | 0.20       | 23.72 | 0.76  | 0.71  | 19.31 | 0.21 | -7.27  | ■ | ■  | ■  | 32 |
| G×(B+G+R)                 | 0.06  | 0.03       | 22.44 | 0.83  | 0.91  | 19.08 | 0.25 | -8.21  | □ | ■  | ■  | 34 |

| Algorithm                              | r <sup>2</sup> | Adj. r <sup>2</sup> | RMSE  | RMLSE | NRMSE | MAE   | MAPE | Bias   | p | CV | NM | n  |
|----------------------------------------|----------------|---------------------|-------|-------|-------|-------|------|--------|---|----|----|----|
| [(1/B)-(1/G)]×N <sup>10</sup>          | 0.41           | 0.40                | 23.75 | 0.66  | 0.71  | 18.62 | 0.20 | -6.57  | ■ | □  | □  | 34 |
| [(1/R)-(1/G)]×N <sup>10</sup>          | 0.03           | -0.02               | 20.87 | 0.48  | 0.65  | 17.40 | 0.13 | -6.94  | □ | ■  | ■  | 24 |
| [(1/R)-(1/B)]×N <sup>10</sup>          | 0.46           | 0.44                | 24.56 | 0.62  | 0.75  | 19.56 | 0.19 | -5.15  | ■ | ■  | ■  | 33 |
| [(1/R)-(0.2363×(1/G))]×N <sup>11</sup> | 0.26           | 0.24                | 25.53 | 0.74  | 0.75  | 19.66 | 0.19 | -9.92  | ■ | ■  | ■  | 33 |
| [(1/R)-(1/B)]/N <sup>12</sup>          | 0.08           | 0.05                | 28.73 | 0.86  | 0.85  | 23.56 | 0.29 | -10.34 | □ | ■  | ■  | 33 |
| (B/R)×N                                | 0.02           | -0.01               | 21.59 | 0.79  | 0.96  | 18.10 | 0.17 | -8.52  | □ | ■  | □  | 30 |
| (G/R)×N                                | 0.05           | 0.01                | 27.56 | 0.82  | 0.81  | 22.63 | 0.24 | -10.77 | □ | ■  | ■  | 33 |
| (R/B)×N                                | 0.00           | -0.03               | 29.15 | 0.92  | 0.88  | 23.76 | 0.26 | -12.43 | □ | ■  | □  | 34 |
| (R/G)×N                                | 0.18           | 0.16                | 28.23 | 0.81  | 0.84  | 22.11 | 0.19 | -14.87 | ■ | ■  | ■  | 32 |
| (R×N)/B <sup>13</sup>                  | 0.00           | -0.03               | 28.94 | 0.94  | 0.87  | 23.88 | 0.32 | -14.80 | □ | ■  | □  | 34 |
| (B/G)×(B/R)                            | 0.75           | 0.74                | 12.78 | 0.42  | 0.58  | 10.96 | 0.16 | -0.78  | ■ | ■  | ■  | 28 |
| (B/G)×(B/N)                            | 0.06           | 0.03                | 27.24 | 0.84  | 0.81  | 22.48 | 0.28 | -11.20 | □ | ■  | □  | 35 |
| (B/G)×(R/G)                            | 0.26           | 0.24                | 23.71 | 0.76  | 0.71  | 19.89 | 0.20 | -9.08  | ■ | ■  | ■  | 35 |
| (B/G)×(R/N)                            | 0.05           | 0.02                | 26.54 | 0.81  | 0.79  | 21.61 | 0.15 | -8.42  | □ | ■  | ■  | 31 |
| (B/G)×(N/B)                            | 0.42           | 0.40                | 26.02 | 0.70  | 0.76  | 21.84 | 0.17 | -7.75  | ■ | ■  | ■  | 30 |
| (B/G)×(N/G)                            | 0.46           | 0.44                | 26.35 | 0.67  | 0.77  | 21.26 | 0.17 | -7.51  | ■ | ■  | ■  | 32 |
| (B/G)×(N/R)                            | 0.57           | 0.55                | 25.60 | 0.59  | 0.76  | 19.90 | 0.15 | -4.96  | ■ | ■  | ■  | 31 |
| (B/R)×(B/N)                            | 0.02           | -0.01               | 30.90 | 0.94  | 0.92  | 24.61 | 0.27 | -13.22 | □ | ■  | □  | 35 |
| (B/R)×(G/R)                            | 0.05           | 0.02                | 28.66 | 0.85  | 0.86  | 23.04 | 0.20 | -15.47 | □ | ■  | ■  | 33 |
| (B/R)×(G/N)                            | 0.13           | 0.10                | 28.22 | 0.83  | 0.84  | 21.93 | 0.27 | -9.99  | ■ | ■  | ■  | 32 |
| (B/R)×(N/R)                            | 0.56           | 0.55                | 26.25 | 0.58  | 0.78  | 20.94 | 0.15 | -7.11  | ■ | ■  | ■  | 31 |
| (B/N)×(G/N)                            | 0.26           | 0.23                | 28.49 | 0.80  | 0.81  | 22.58 | 0.21 | -9.78  | ■ | ■  | ■  | 29 |
| (B/N)×(R/N)                            | 0.19           | 0.17                | 25.07 | 0.76  | 0.75  | 21.08 | 0.22 | -11.48 | ■ | ■  | ■  | 32 |
| (G/B)×(G/R)                            | 0.28           | 0.25                | 27.57 | 0.80  | 0.81  | 21.18 | 0.20 | -12.28 | ■ | □  | ■  | 34 |
| (G/B)×(G/N)                            | 0.34           | 0.32                | 27.68 | 0.74  | 0.81  | 21.17 | 0.18 | -5.46  | ■ | □  | ■  | 32 |
| (G/B)×(R/B)                            | 0.29           | 0.27                | 27.52 | 0.75  | 0.82  | 22.16 | 0.21 | -9.55  | ■ | □  | ■  | 34 |
| (G/B)×(R/N)                            | 0.35           | 0.33                | 29.00 | 0.72  | 0.84  | 22.65 | 0.20 | -6.63  | ■ | ■  | ■  | 32 |
| (G/B)×(N/B)                            | 0.08           | 0.05                | 27.85 | 0.87  | 0.83  | 22.53 | 0.29 | -13.28 | □ | ■  | ■  | 35 |
| (G/B)×(N/R)                            | 0.01           | -0.02               | 28.53 | 0.87  | 0.86  | 22.63 | 0.19 | -10.04 | □ | ■  | ■  | 33 |
| (G/R)×(G/N)                            | 0.31           | 0.29                | 26.15 | 0.74  | 0.77  | 22.30 | 0.21 | -6.80  | ■ | ■  | ■  | 31 |
| (G/R)×(N/R)                            | 0.27           | 0.24                | 25.24 | 0.73  | 0.76  | 19.04 | 0.16 | -8.26  | ■ | ■  | ■  | 32 |
| (G/N)×(R/N)                            | 0.37           | 0.35                | 27.69 | 0.72  | 0.79  | 21.09 | 0.20 | -8.88  | ■ | ■  | ■  | 29 |
| (R/B)×(R/G)                            | 0.02           | -0.01               | 25.88 | 0.85  | 0.78  | 21.06 | 0.19 | -10.63 | □ | ■  | ■  | 32 |
| (R/B)×(R/N)                            | 0.75           | 0.74                | 17.03 | 0.43  | 0.44  | 13.81 | 0.14 | -3.04  | ■ | ■  | ■  | 23 |
| (R/B)×(N/B)                            | 0.01           | -0.02               | 29.91 | 0.92  | 0.90  | 23.94 | 0.39 | -9.92  | □ | ■  | □  | 34 |
| (R/B)×(N/G)                            | 0.04           | 0.01                | 25.94 | 0.82  | 0.78  | 21.77 | 0.31 | -12.63 | □ | ■  | ■  | 34 |
| (R/G)×(R/N)                            | 0.19           | 0.16                | 26.85 | 0.80  | 0.79  | 21.66 | 0.16 | -9.87  | ■ | ■  | ■  | 33 |
| (R/G)×(N/G)                            | 0.46           | 0.44                | 26.41 | 0.65  | 0.76  | 20.84 | 0.18 | -7.26  | ■ | ■  | ■  | 29 |
| (N/B)×(N/G)                            | 0.17           | 0.14                | 26.30 | 0.77  | 0.79  | 20.46 | 0.23 | -8.29  | ■ | ■  | ■  | 33 |
| (N/B)×(N/R)                            | 0.15           | 0.12                | 27.74 | 0.83  | 0.83  | 21.51 | 0.22 | -12.78 | ■ | ■  | ■  | 33 |
| (N/G)×(N/R)                            | 0.53           | 0.51                | 23.58 | 0.61  | 0.69  | 18.94 | 0.16 | -7.57  | ■ | ■  | ■  | 28 |

(1) Fadel et al., 2016; (2) Patra et al., 2015; (3) Tucker, 1979; (4) Ho et al., 2017; (5) Boucher et al., 2018; (6) Kabbara et al., 2008; (7) Trinh et al., 2017; (8) Alawadi et al., 2010; (9) Mayo et al., 1995; (10) Keith et al., 2018; (11) Chenet et al., 2013; (12) Singh et al., 2014; (13) Guan, 2009.

Kab1 = 1.67-3.94×ln(B)+3.78×ln(G)

NDVI = (N-R)/(N+R)

NRVI = [(R/NIR)-1]/[(R/NIR)+1]

SABI = (N-R)/(B+G)

**OC2=0.1977+(-1.8117(log10(BG)))1+(1.9743(log10(BG)))2+(2.5635(log10(BG)))3+(-0.7218(log10(BG)))4**

**Table S3c.** Chl-*a* retrieval algorithm results summary for OWT-C<sub>q</sub> after outlier removal. Parameters displayed are coefficient of determination ( $r^2$ ), p-value (p), root mean square error (RMSE; ( $\mu\text{g L}^{-1}$ )), root mean square log error (RMSLE), normalized root mean square error, mean absolute error (MAE, ( $\mu\text{g L}^{-1}$ )), median absolute percentage error (MAPE %), bias ( $\mu\text{g L}^{-1}$ ), Breusch-Pagan constant variance (CV), and Shapiro-Wilks normality (NM). Filled boxes indicate that the assumptions of linear regressions have been met ( $r^2 \geq 0.05$ , CV and NM  $p \geq 0.05$ ), empty boxes indicate that the assumptions have not been met.

| Algorithm                 | $r^2$ | Adj. $r^2$ | RMSE  | RMLSE | NRMSE | MAE   | MAPE | Bias   | p | CV | NM | n  |
|---------------------------|-------|------------|-------|-------|-------|-------|------|--------|---|----|----|----|
| B                         | 0.01  | -0.06      | 25.42 | 0.73  | 0.87  | 23.48 | 0.24 | -10.16 | □ | ■  | ■  | 16 |
| G                         | 0.00  | -0.07      | 19.16 | 0.64  | 0.75  | 17.17 | 0.23 | -5.14  | □ | ■  | ■  | 16 |
| R                         | 0.00  | -0.07      | 21.43 | 0.64  | 0.74  | 19.52 | 0.21 | -7.78  | □ | ■  | ■  | 17 |
| N                         | 0.03  | -0.03      | 22.26 | 0.63  | 0.77  | 20.71 | 0.20 | -11.36 | □ | ■  | ■  | 17 |
| B×G                       | 0.01  | -0.06      | 20.92 | 0.64  | 0.71  | 18.85 | 0.22 | -6.86  | □ | □  | ■  | 16 |
| B×R                       | 0.05  | -0.02      | 19.81 | 0.59  | 0.67  | 18.10 | 0.22 | -5.06  | □ | ■  | ■  | 15 |
| B×N                       | 0.59  | 0.54       | 17.45 | 0.43  | 0.55  | 17.45 | 0.14 | -5.39  | ■ | ■  | ■  | 10 |
| G×R                       | 0.06  | -0.01      | 18.14 | 0.55  | 0.69  | 16.98 | 0.19 | -7.29  | □ | ■  | ■  | 14 |
| G×N                       | 0.04  | -0.03      | 21.92 | 0.71  | 0.75  | 19.84 | 0.25 | -5.72  | □ | ■  | ■  | 16 |
| R×N                       | 0.04  | -0.04      | 20.03 | 0.64  | 0.68  | 19.65 | 0.24 | -4.24  | □ | ■  | ■  | 15 |
| B/G                       | 0.16  | 0.09       | 20.26 | 0.60  | 0.76  | 19.25 | 0.19 | -10.42 | □ | ■  | ■  | 15 |
| B/R                       | 0.11  | 0.04       | 26.03 | 0.69  | 0.90  | 24.71 | 0.21 | -12.96 | □ | ■  | ■  | 16 |
| B/N                       | 0.00  | -0.07      | 24.10 | 0.68  | 0.84  | 22.25 | 0.22 | -11.80 | □ | ■  | ■  | 17 |
| G/B                       | 0.16  | 0.10       | 19.40 | 0.62  | 0.73  | 17.72 | 0.21 | -7.12  | □ | ■  | ■  | 15 |
| G/R                       | 0.06  | 0.00       | 21.88 | 0.65  | 0.76  | 18.64 | 0.20 | -8.27  | □ | □  | ■  | 17 |
| G/N                       | 0.00  | -0.07      | 21.46 | 0.69  | 0.84  | 19.72 | 0.22 | -9.08  | □ | ■  | ■  | 16 |
| R/B                       | 0.10  | 0.03       | 22.69 | 0.63  | 0.78  | 21.09 | 0.21 | -8.27  | □ | ■  | ■  | 16 |
| R/G                       | 0.06  | 0.00       | 23.21 | 0.68  | 0.81  | 20.85 | 0.23 | -9.09  | □ | □  | ■  | 17 |
| R/N                       | 0.01  | -0.08      | 20.57 | 0.64  | 0.77  | 19.28 | 0.21 | -8.81  | □ | ■  | ■  | 14 |
| N/B                       | 0.00  | -0.07      | 22.54 | 0.67  | 0.78  | 19.71 | 0.21 | -7.67  | □ | ■  | ■  | 17 |
| N/G                       | 0.05  | -0.02      | 22.87 | 0.69  | 0.80  | 19.54 | 0.22 | -6.66  | □ | ■  | ■  | 17 |
| N/R                       | 0.08  | 0.02       | 19.62 | 0.60  | 0.68  | 18.35 | 0.21 | -4.44  | □ | ■  | ■  | 16 |
| B×G×R <sup>1</sup>        | 0.10  | 0.03       | 21.81 | 0.58  | 0.74  | 19.21 | 0.18 | -9.26  | □ | ■  | ■  | 15 |
| B×G×N <sup>1</sup>        | 0.00  | -0.07      | 22.69 | 0.63  | 0.78  | 21.14 | 0.21 | -10.43 | □ | □  | ■  | 16 |
| B×R×N <sup>1</sup>        | 0.09  | 0.01       | 22.73 | 0.63  | 0.77  | 20.52 | 0.22 | -6.03  | □ | ■  | ■  | 14 |
| G×R×N <sup>1</sup>        | 0.13  | 0.06       | 21.57 | 0.63  | 0.73  | 21.21 | 0.21 | -9.19  | □ | ■  | ■  | 15 |
| Avg(B;G) <sup>1,2</sup>   | 0.02  | -0.06      | 22.13 | 0.68  | 0.76  | 19.93 | 0.24 | -6.68  | □ | □  | ■  | 16 |
| Avg(B;R) <sup>1,2</sup>   | 0.01  | -0.06      | 21.50 | 0.68  | 0.75  | 20.12 | 0.23 | -7.18  | □ | ■  | ■  | 17 |
| Avg(B;N) <sup>1,2</sup>   | 0.27  | 0.21       | 20.70 | 0.59  | 0.73  | 19.18 | 0.19 | -10.02 | □ | ■  | ■  | 14 |
| Avg(G;R) <sup>1,2</sup>   | 0.06  | -0.01      | 17.79 | 0.55  | 0.67  | 16.76 | 0.19 | -7.41  | □ | ■  | ■  | 14 |
| Avg(G;N) <sup>1,2</sup>   | 0.03  | -0.04      | 26.94 | 0.78  | 0.92  | 25.48 | 0.26 | -11.81 | □ | ■  | ■  | 16 |
| Avg(R;N) <sup>1,2</sup>   | 0.01  | -0.05      | 23.61 | 0.69  | 0.82  | 20.12 | 0.21 | -9.74  | □ | ■  | ■  | 17 |
| N-R <sup>3,4</sup>        | 0.09  | 0.02       | 24.43 | 0.71  | 0.84  | 21.71 | 0.24 | -7.78  | □ | ■  | ■  | 16 |
| KabI <sup>5,6</sup>       | 0.17  | 0.11       | 18.71 | 0.57  | 0.71  | 18.02 | 0.19 | -9.95  | □ | ■  | ■  | 15 |
| NDVI                      | 0.09  | 0.02       | 24.94 | 0.69  | 0.86  | 23.15 | 0.21 | -12.55 | □ | ■  | ■  | 16 |
| NRVI                      | 0.09  | 0.02       | 18.79 | 0.58  | 0.65  | 17.72 | 0.19 | -5.75  | □ | ■  | ■  | 16 |
| OC2 <sup>7</sup>          | 0.16  | 0.10       | 18.13 | 0.62  | 0.68  | 16.09 | 0.21 | -4.10  | □ | ■  | ■  | 15 |
| SABl <sup>5,8</sup>       | 0.08  | 0.01       | 21.29 | 0.59  | 0.73  | 19.32 | 0.18 | -9.76  | □ | ■  | ■  | 16 |
| (B-R)/G <sup>4,9</sup>    | 0.17  | 0.11       | 17.64 | 0.59  | 0.67  | 15.67 | 0.20 | -5.30  | □ | ■  | ■  | 15 |
| (N/G)+(N/B) <sup>10</sup> | 0.02  | -0.05      | 21.48 | 0.64  | 0.75  | 18.68 | 0.22 | -7.15  | □ | ■  | ■  | 17 |
| G×(B+G+R)                 | 0.05  | -0.03      | 20.39 | 0.64  | 0.77  | 19.31 | 0.23 | -7.89  | □ | ■  | ■  | 14 |



| Algorithm                            | r <sup>2</sup> | Adj. r <sup>2</sup> | RMSE  | RMLSE | NRMSE | MAE   | MAPE | Bias   | p | CV | NM | n  |
|--------------------------------------|----------------|---------------------|-------|-------|-------|-------|------|--------|---|----|----|----|
| [(1/B)-(1/G)]×N <sup>10</sup>        | 0.08           | 0.01                | 19.89 | 0.64  | 0.78  | 17.65 | 0.20 | -8.30  | □ | ■  | ■  | 16 |
| [(1/R)-(1/G)]×N <sup>10</sup>        | 0.01           | -0.06               | 26.05 | 0.73  | 0.91  | 24.60 | 0.23 | -13.23 | □ | ■  | ■  | 17 |
| [(1/R)-(1/B)]×N <sup>10</sup>        | 0.11           | 0.04                | 20.90 | 0.58  | 0.72  | 18.69 | 0.19 | -7.52  | □ | ■  | ■  | 16 |
| [(1/R)-(0.2363×(1/G))] <sup>11</sup> | 0.07           | 0.01                | 21.33 | 0.62  | 0.74  | 19.32 | 0.22 | -6.50  | □ | ■  | ■  | 16 |
| [(1/R)-(1/B)]/N <sup>12</sup>        | 0.01           | -0.05               | 23.39 | 0.73  | 0.81  | 20.21 | 0.25 | -6.03  | □ | ■  | ■  | 17 |
| (B/R)×N                              | 0.00           | -0.07               | 22.06 | 0.69  | 0.77  | 19.91 | 0.22 | -7.08  | □ | ■  | ■  | 17 |
| (G/R)×N                              | 0.00           | -0.07               | 23.60 | 0.68  | 0.82  | 21.78 | 0.22 | -10.70 | □ | ■  | ■  | 17 |
| (R/B)×N                              | 0.00           | -0.06               | 21.51 | 0.72  | 0.74  | 19.31 | 0.52 | -9.79  | □ | ■  | ■  | 18 |
| (R/G)×N                              | 0.04           | -0.02               | 22.04 | 0.75  | 0.76  | 19.60 | 0.53 | -10.92 | □ | ■  | ■  | 18 |
| (R×N)/B <sup>13</sup>                | 0.00           | -0.06               | 24.49 | 0.89  | 0.84  | 20.63 | 0.86 | -8.46  | □ | ■  | ■  | 18 |
| (B/G)×(B/R)                          | 0.02           | -0.05               | 18.42 | 0.62  | 0.72  | 16.91 | 0.21 | -5.21  | □ | ■  | ■  | 16 |
| (B/G)×(B/N)                          | 0.14           | 0.08                | 22.64 | 0.70  | 0.76  | 20.55 | 0.24 | -4.54  | □ | ■  | □  | 16 |
| (B/G)×(R/G)                          | 0.33           | 0.28                | 16.70 | 0.56  | 0.56  | 16.27 | 0.20 | -7.98  | ■ | ■  | ■  | 16 |
| (B/G)×(R/N)                          | 0.06           | -0.01               | 22.84 | 0.69  | 0.77  | 20.43 | 0.23 | -6.71  | □ | ■  | ■  | 16 |
| (B/G)×(N/B)                          | 0.05           | -0.02               | 20.76 | 0.62  | 0.72  | 18.11 | 0.20 | -6.69  | □ | ■  | ■  | 17 |
| (B/G)×(N/G)                          | 0.02           | -0.05               | 19.51 | 0.62  | 0.76  | 17.93 | 0.21 | -8.03  | □ | ■  | ■  | 16 |
| (B/G)×(N/R)                          | 0.07           | 0.00                | 17.75 | 0.58  | 0.69  | 16.00 | 0.20 | -5.35  | □ | ■  | ■  | 15 |
| (B/R)×(B/N)                          | 0.02           | -0.04               | 22.88 | 0.68  | 0.80  | 20.30 | 0.22 | -7.38  | □ | ■  | ■  | 17 |
| (B/R)×(G/R)                          | 0.00           | -0.06               | 24.74 | 0.70  | 0.86  | 22.57 | 0.22 | -11.48 | □ | ■  | ■  | 17 |
| (B/R)×(G/N)                          | 0.01           | -0.06               | 24.05 | 0.68  | 0.84  | 21.45 | 0.21 | -11.50 | □ | □  | ■  | 17 |
| (B/R)×(N/R)                          | 0.12           | 0.05                | 21.46 | 0.65  | 0.74  | 19.10 | 0.22 | -6.08  | □ | ■  | ■  | 16 |
| (B/N)×(G/N)                          | 0.01           | -0.05               | 21.20 | 0.64  | 0.74  | 18.91 | 0.22 | -7.14  | □ | ■  | ■  | 17 |
| (B/N)×(R/N)                          | 0.04           | -0.03               | 23.20 | 0.65  | 0.80  | 20.51 | 0.21 | -9.38  | □ | ■  | ■  | 16 |
| (G/B)×(G/R)                          | 0.29           | 0.24                | 18.34 | 0.59  | 0.64  | 17.35 | 0.20 | -7.31  | ■ | ■  | ■  | 17 |
| (G/B)×(G/N)                          | 0.09           | 0.02                | 21.01 | 0.67  | 0.81  | 18.95 | 0.23 | -7.68  | □ | ■  | ■  | 15 |
| (G/B)×(R/B)                          | 0.01           | -0.06               | 21.75 | 0.70  | 0.85  | 20.44 | 0.24 | -8.98  | □ | ■  | ■  | 16 |
| (G/B)×(R/N)                          | 0.06           | -0.01               | 18.32 | 0.56  | 0.71  | 16.62 | 0.19 | -6.64  | □ | ■  | ■  | 15 |
| (G/B)×(N/B)                          | 0.06           | 0.00                | 24.05 | 0.72  | 0.84  | 22.18 | 0.24 | -7.89  | □ | ■  | □  | 17 |
| (G/B)×(N/R)                          | 0.05           | -0.02               | 23.12 | 0.71  | 0.79  | 22.90 | 0.24 | -9.57  | □ | ■  | ■  | 16 |
| (G/R)×(G/N)                          | 0.02           | -0.05               | 17.04 | 0.57  | 0.66  | 16.45 | 0.19 | -8.24  | □ | □  | ■  | 16 |
| (G/R)×(N/R)                          | 0.09           | 0.02                | 16.38 | 0.51  | 0.62  | 16.37 | 0.17 | -7.33  | □ | ■  | ■  | 14 |
| (G/N)×(R/N)                          | 0.03           | -0.04               | 19.23 | 0.59  | 0.74  | 18.12 | 0.19 | -8.74  | □ | ■  | ■  | 15 |
| (R/B)×(R/G)                          | 0.00           | -0.07               | 24.86 | 0.72  | 0.86  | 22.77 | 0.23 | -11.06 | □ | ■  | ■  | 17 |
| (R/B)×(R/N)                          | 0.01           | -0.07               | 22.94 | 0.71  | 0.86  | 22.14 | 0.24 | -10.36 | □ | ■  | ■  | 14 |
| (R/B)×(N/B)                          | 0.01           | -0.06               | 21.18 | 0.65  | 0.74  | 20.26 | 0.21 | -8.47  | □ | ■  | ■  | 17 |
| (R/B)×(N/G)                          | 0.01           | -0.05               | 20.95 | 0.61  | 0.73  | 18.48 | 0.20 | -6.90  | □ | □  | ■  | 17 |
| (R/G)×(R/N)                          | 0.03           | -0.05               | 22.80 | 0.65  | 0.76  | 21.99 | 0.22 | -9.30  | □ | ■  | ■  | 15 |
| (R/G)×(N/G)                          | 0.06           | 0.00                | 20.75 | 0.60  | 0.72  | 18.05 | 0.20 | -8.45  | □ | □  | ■  | 17 |
| (N/B)×(N/G)                          | 0.02           | -0.05               | 22.11 | 0.63  | 0.77  | 19.35 | 0.20 | -9.82  | □ | ■  | ■  | 17 |
| (N/B)×(N/R)                          | 0.01           | -0.06               | 24.10 | 0.73  | 0.84  | 20.54 | 0.23 | -7.98  | □ | ■  | ■  | 17 |
| (N/G)×(N/R)                          | 0.03           | -0.03               | 23.76 | 0.68  | 0.83  | 20.89 | 0.21 | -9.58  | □ | ■  | ■  | 17 |

(1) Fadel et al., 2016; (2) Patra et al., 2015; (3) Tucker, 1979; (4) Ho et al., 2017; (5) Boucher et al., 2018; (6) Kabbara et al., 2008; (7) Trinh et al., 2017; (8) Alawadi et al., 2010; (9) Mayo et al., 1995; (10) Keith et al., 2018; (11) Chenet et al., 2013; (12) Singh et al., 2014; (13) Guan, 2009.

Kab1 = 1.67-3.94×ln(B)+3.78×ln(G)

NDVI = (N-R)/(N+R)

NRVI = [(R/NIR)-1]/[(R/NIR)+1]

SABI = (N-R)/(B+G)

**OC2=0.1977+(-1.8117(log10(BG)))1+(1.9743(log10(BG)))2+(2.5635(log10(BG)))3+(-0.7218(log10(BG)))4**

**Table S3d.** Chl-*a* retrieval algorithm results summary for OWT-D<sub>q</sub> after outlier removal. Parameters displayed are coefficient of determination ( $r^2$ ), p-value (p), root mean square error (RMSE; ( $\mu\text{g L}^{-1}$ )), root mean square log error (RMSLE), normalized root mean square error, mean absolute error (MAE, ( $\mu\text{g L}^{-1}$ )), median absolute percentage error (MAPE %), bias ( $\mu\text{g L}^{-1}$ ), Breusch-Pagan constant variance (CV), and Shapiro-Wilks normality (NM). Filled boxes indicate that the assumptions of linear regressions have been met ( $r^2 \geq 0.05$ , CV and NM  $p \geq 0.05$ ), empty boxes indicate that the assumptions have not been met.

| Algorithm                 | $r^2$ | Adj. $r^2$ | RMSE | RMLSE | NRMSE | MAE  | MAPE | Bias  | p | CV | NM | n  |
|---------------------------|-------|------------|------|-------|-------|------|------|-------|---|----|----|----|
| B                         | 0.08  | -0.01      | 0.83 | 0.33  | 0.73  | 0.80 | 0.99 | -0.17 | □ | ■  | ■  | 13 |
| G                         | 0.24  | 0.16       | 0.83 | 0.29  | 0.74  | 0.81 | 0.76 | -0.32 | □ | ■  | ■  | 12 |
| R                         | 0.56  | 0.50       | 0.66 | 0.23  | 0.57  | 0.66 | 0.71 | -0.15 | ■ | ■  | ■  | 10 |
| N                         | 0.37  | 0.31       | 0.59 | 0.23  | 0.59  | 0.56 | 0.55 | -0.15 | ■ | ■  | ■  | 13 |
| B×G                       | 0.01  | -0.08      | 0.97 | 0.37  | 0.85  | 0.95 | 1.06 | -0.26 | □ | ■  | ■  | 13 |
| B×R                       | 0.02  | -0.06      | 1.03 | 0.39  | 0.91  | 0.99 | 1.06 | -0.33 | □ | ■  | ■  | 13 |
| B×N                       | 0.09  | 0.01       | 0.93 | 0.33  | 0.81  | 0.88 | 0.86 | -0.35 | □ | ■  | ■  | 14 |
| G×R                       | 0.52  | 0.47       | 0.75 | 0.25  | 0.68  | 0.75 | 0.75 | -0.24 | ■ | ■  | ■  | 11 |
| G×N                       | 0.05  | -0.03      | 0.99 | 0.36  | 0.86  | 0.92 | 0.92 | -0.30 | □ | ■  | ■  | 14 |
| R×N                       | 0.03  | -0.05      | 1.06 | 0.39  | 0.92  | 1.05 | 0.96 | -0.48 | □ | ■  | ■  | 14 |
| B/G                       | 0.12  | 0.04       | 0.95 | 0.36  | 0.82  | 0.89 | 0.97 | -0.21 | □ | ■  | ■  | 14 |
| B/R                       | 0.11  | 0.03       | 0.98 | 0.37  | 0.85  | 0.92 | 1.09 | -0.12 | □ | ■  | ■  | 14 |
| B/N                       | 0.15  | 0.08       | 0.91 | 0.34  | 0.79  | 0.89 | 0.81 | -0.38 | □ | ■  | ■  | 14 |
| G/B                       | 0.10  | 0.03       | 1.06 | 0.38  | 0.92  | 1.03 | 0.85 | -0.57 | □ | ■  | ■  | 14 |
| G/R                       | 0.13  | 0.06       | 0.82 | 0.32  | 0.82  | 0.81 | 0.82 | -0.31 | □ | ■  | ■  | 13 |
| G/N                       | 0.21  | 0.14       | 0.74 | 0.27  | 0.64  | 0.67 | 0.65 | -0.25 | □ | ■  | ■  | 14 |
| R/B                       | 0.09  | 0.02       | 1.04 | 0.38  | 0.90  | 0.98 | 1.01 | -0.34 | □ | ■  | ■  | 14 |
| R/G                       | 0.06  | -0.04      | 0.80 | 0.30  | 0.79  | 0.79 | 0.83 | -0.31 | □ | ■  | ■  | 12 |
| R/N                       | 0.21  | 0.14       | 0.86 | 0.32  | 0.75  | 0.81 | 0.81 | -0.17 | □ | ■  | ■  | 14 |
| N/B                       | 0.14  | 0.07       | 0.78 | 0.28  | 0.67  | 0.70 | 0.62 | -0.37 | □ | ■  | ■  | 14 |
| N/G                       | 0.41  | 0.36       | 0.59 | 0.23  | 0.58  | 0.57 | 0.59 | -0.21 | ■ | ■  | ■  | 13 |
| N/R                       | 0.26  | 0.20       | 0.69 | 0.26  | 0.60  | 0.62 | 0.72 | -0.08 | □ | ■  | ■  | 14 |
| B×G×R <sup>1</sup>        | 0.42  | 0.35       | 0.67 | 0.24  | 0.57  | 0.67 | 0.81 | -0.21 | ■ | ■  | ■  | 10 |
| B×G×N <sup>1</sup>        | 0.12  | 0.04       | 0.82 | 0.31  | 0.72  | 0.78 | 0.82 | -0.27 | □ | ■  | ■  | 13 |
| B×R×N <sup>1</sup>        | 0.24  | 0.17       | 0.65 | 0.26  | 0.68  | 0.62 | 0.75 | -0.16 | □ | ■  | ■  | 12 |
| G×R×N <sup>1</sup>        | 0.05  | -0.03      | 0.96 | 0.35  | 0.84  | 0.94 | 0.89 | -0.40 | □ | ■  | ■  | 13 |
| Avg(B;G) <sup>1,2</sup>   | 0.01  | -0.08      | 0.87 | 0.34  | 0.77  | 0.85 | 1.00 | -0.21 | □ | ■  | ■  | 13 |
| Avg(B;R) <sup>1,2</sup>   | 0.04  | -0.05      | 1.00 | 0.37  | 0.88  | 0.96 | 1.02 | -0.33 | □ | ■  | ■  | 13 |
| Avg(B;N) <sup>1,2</sup>   | 0.14  | 0.06       | 0.74 | 0.28  | 0.65  | 0.69 | 0.76 | -0.24 | □ | ■  | ■  | 13 |
| Avg(G;R) <sup>1,2</sup>   | 0.51  | 0.46       | 0.78 | 0.25  | 0.70  | 0.77 | 0.73 | -0.14 | ■ | ■  | ■  | 11 |
| Avg(G;N) <sup>1,2</sup>   | 0.12  | 0.04       | 0.84 | 0.32  | 0.74  | 0.83 | 0.87 | -0.24 | □ | ■  | ■  | 13 |
| Avg(R;N) <sup>1,2</sup>   | 0.05  | -0.02      | 0.98 | 0.36  | 0.85  | 0.94 | 0.99 | -0.23 | □ | ■  | ■  | 14 |
| N-R <sup>3,4</sup>        | 0.23  | 0.17       | 0.89 | 0.32  | 0.77  | 0.87 | 0.73 | -0.46 | □ | ■  | ■  | 14 |
| Kab1 <sup>5,6</sup>       | 0.10  | 0.03       | 0.86 | 0.34  | 0.75  | 0.84 | 0.94 | -0.17 | □ | ■  | ■  | 14 |
| NDVI                      | 0.23  | 0.17       | 0.78 | 0.30  | 0.68  | 0.68 | 0.84 | -0.06 | □ | ■  | ■  | 14 |
| NRVI                      | 0.23  | 0.17       | 0.90 | 0.32  | 0.78  | 0.87 | 0.72 | -0.45 | □ | ■  | ■  | 14 |
| OC2 <sup>7</sup>          | 0.11  | 0.03       | 1.01 | 0.36  | 0.88  | 0.96 | 0.87 | -0.44 | □ | ■  | ■  | 14 |
| SAB1 <sup>5,8</sup>       | 0.23  | 0.17       | 0.78 | 0.29  | 0.68  | 0.72 | 0.75 | -0.28 | □ | ■  | ■  | 14 |
| (B-R)/G <sup>4,9</sup>    | 0.12  | 0.05       | 0.87 | 0.33  | 0.75  | 0.80 | 0.90 | -0.15 | □ | ■  | ■  | 14 |
| (N/G)+(N/B) <sup>10</sup> | 0.20  | 0.13       | 0.70 | 0.26  | 0.61  | 0.63 | 0.65 | -0.21 | □ | ■  | ■  | 14 |
| G×(B+G+R)                 | 0.36  | 0.29       | 0.71 | 0.25  | 0.63  | 0.70 | 0.74 | -0.20 | □ | ■  | ■  | 11 |

| Algorithm                              | r <sup>2</sup> | Adj. r <sup>2</sup> | RMSE | RMLSE | NRMSE | MAE  | MAPE | Bias  | p | CV | NM | n  |
|----------------------------------------|----------------|---------------------|------|-------|-------|------|------|-------|---|----|----|----|
| [(1/B)-(1/G)]×N <sup>10</sup>          | 0.16           | 0.09                | 0.88 | 0.32  | 0.76  | 0.81 | 0.81 | -0.31 | □ | ■  | ■  | 14 |
| [(1/R)-(1/G)]×N <sup>10</sup>          | 0.24           | 0.18                | 0.78 | 0.30  | 0.68  | 0.74 | 0.93 | -0.22 | □ | ■  | ■  | 14 |
| [(1/R)-(1/B)]×N <sup>10</sup>          | 0.25           | 0.19                | 0.87 | 0.32  | 0.76  | 0.86 | 0.86 | -0.29 | □ | ■  | ■  | 14 |
| [(1/R)-(0.2363×(1/G))]×N <sup>11</sup> | 0.26           | 0.20                | 0.77 | 0.28  | 0.66  | 0.70 | 0.74 | -0.28 | □ | ■  | ■  | 14 |
| [(1/R)-(1/B)]/N <sup>12</sup>          | 0.47           | 0.40                | 0.88 | 0.30  | 0.68  | 0.88 | 0.80 | -0.24 | ■ | ■  | ■  | 10 |
| (B/R)×N                                | 0.34           | 0.27                | 0.76 | 0.28  | 0.64  | 0.72 | 0.85 | -0.15 | □ | ■  | ■  | 11 |
| (G/R)×N                                | 0.25           | 0.19                | 0.71 | 0.26  | 0.61  | 0.69 | 0.71 | -0.18 | □ | ■  | ■  | 14 |
| (R/B)×N                                | 0.06           | -0.02               | 0.89 | 0.33  | 0.77  | 0.84 | 0.87 | -0.24 | □ | ■  | ■  | 14 |
| (R/G)×N                                | 0.33           | 0.27                | 0.65 | 0.24  | 0.64  | 0.61 | 0.57 | -0.32 | ■ | ■  | ■  | 13 |
| (R×N)/B <sup>13</sup>                  | 0.06           | -0.02               | 0.83 | 0.31  | 0.72  | 0.78 | 0.86 | -0.20 | □ | ■  | ■  | 14 |
| (B/G)×(B/R)                            | 0.13           | 0.06                | 0.93 | 0.33  | 0.81  | 0.90 | 0.83 | -0.40 | □ | ■  | ■  | 14 |
| (B/G)×(B/N)                            | 0.08           | 0.00                | 0.92 | 0.34  | 0.79  | 0.89 | 0.85 | -0.41 | □ | ■  | ■  | 14 |
| (B/G)×(R/G)                            | 0.26           | 0.19                | 0.80 | 0.30  | 0.80  | 0.80 | 0.74 | -0.32 | □ | ■  | ■  | 13 |
| (B/G)×(R/N)                            | 0.08           | 0.00                | 0.91 | 0.35  | 0.80  | 0.84 | 0.97 | -0.24 | □ | ■  | ■  | 13 |
| (B/G)×(N/B)                            | 0.41           | 0.36                | 0.58 | 0.23  | 0.57  | 0.54 | 0.62 | -0.11 | ■ | ■  | ■  | 13 |
| (B/G)×(N/G)                            | 0.41           | 0.36                | 0.64 | 0.24  | 0.64  | 0.62 | 0.58 | -0.29 | ■ | ■  | ■  | 13 |
| (B/G)×(N/R)                            | 0.25           | 0.19                | 0.70 | 0.25  | 0.61  | 0.64 | 0.64 | -0.21 | □ | ■  | ■  | 14 |
| (B/R)×(B/N)                            | 0.08           | 0.01                | 0.98 | 0.37  | 0.85  | 0.96 | 0.98 | -0.35 | □ | ■  | ■  | 14 |
| (B/R)×(G/R)                            | 0.06           | -0.02               | 1.02 | 0.37  | 0.89  | 0.95 | 1.00 | -0.37 | □ | ■  | ■  | 14 |
| (B/R)×(G/N)                            | 0.15           | 0.08                | 0.93 | 0.34  | 0.81  | 0.89 | 0.81 | -0.44 | □ | ■  | ■  | 14 |
| (B/R)×(N/R)                            | 0.27           | 0.21                | 0.81 | 0.30  | 0.70  | 0.78 | 0.80 | -0.25 | □ | ■  | ■  | 14 |
| (B/N)×(G/N)                            | 0.11           | 0.03                | 0.84 | 0.33  | 0.74  | 0.80 | 0.94 | -0.16 | □ | ■  | ■  | 13 |
| (B/N)×(R/N)                            | 0.11           | 0.03                | 0.89 | 0.33  | 0.78  | 0.87 | 0.82 | -0.42 | □ | ■  | ■  | 13 |
| (G/B)×(G/R)                            | 0.22           | 0.15                | 0.77 | 0.30  | 0.76  | 0.73 | 0.78 | -0.21 | □ | ■  | ■  | 13 |
| (G/B)×(G/N)                            | 0.21           | 0.14                | 0.82 | 0.30  | 0.72  | 0.79 | 0.72 | -0.36 | □ | ■  | ■  | 14 |
| (G/B)×(R/B)                            | 0.09           | 0.02                | 1.06 | 0.38  | 0.92  | 1.03 | 0.86 | -0.53 | □ | ■  | ■  | 14 |
| (G/B)×(R/N)                            | 0.22           | 0.15                | 0.75 | 0.29  | 0.65  | 0.66 | 0.79 | -0.09 | □ | ■  | ■  | 14 |
| (G/B)×(N/B)                            | 0.01           | -0.09               | 1.00 | 0.38  | 0.86  | 0.99 | 1.00 | -0.46 | □ | ■  | ■  | 12 |
| (G/B)×(N/R)                            | 0.15           | 0.08                | 0.83 | 0.31  | 0.72  | 0.75 | 0.84 | -0.27 | □ | ■  | ■  | 14 |
| (G/R)×(G/N)                            | 0.36           | 0.31                | 0.66 | 0.27  | 0.65  | 0.65 | 0.68 | -0.27 | ■ | ■  | ■  | 13 |
| (G/R)×(N/R)                            | 0.27           | 0.21                | 0.81 | 0.30  | 0.70  | 0.77 | 0.78 | -0.28 | □ | ■  | ■  | 14 |
| (G/N)×(R/N)                            | 0.13           | 0.05                | 0.85 | 0.32  | 0.75  | 0.80 | 0.82 | -0.31 | □ | ■  | ■  | 13 |
| (R/B)×(R/G)                            | 0.44           | 0.37                | 0.72 | 0.27  | 0.56  | 0.72 | 0.82 | -0.23 | ■ | ■  | ■  | 10 |
| (R/B)×(R/N)                            | 0.23           | 0.16                | 0.87 | 0.31  | 0.75  | 0.86 | 0.73 | -0.42 | □ | ■  | ■  | 14 |
| (R/B)×(N/B)                            | 0.08           | -0.01               | 0.92 | 0.35  | 0.78  | 0.90 | 0.99 | -0.25 | □ | ■  | ■  | 13 |
| (R/B)×(N/G)                            | 0.28           | 0.21                | 0.61 | 0.24  | 0.61  | 0.60 | 0.58 | -0.33 | □ | ■  | ■  | 13 |
| (R/G)×(R/N)                            | 0.16           | 0.09                | 0.76 | 0.30  | 0.67  | 0.73 | 0.93 | -0.12 | □ | ■  | ■  | 13 |
| (R/G)×(N/G)                            | 0.40           | 0.35                | 0.60 | 0.23  | 0.60  | 0.59 | 0.51 | -0.26 | ■ | ■  | ■  | 13 |
| (N/B)×(N/G)                            | 0.38           | 0.32                | 0.52 | 0.20  | 0.52  | 0.49 | 0.49 | -0.22 | ■ | ■  | ■  | 13 |
| (N/B)×(N/R)                            | 0.23           | 0.16                | 0.72 | 0.27  | 0.63  | 0.64 | 0.68 | -0.19 | □ | ■  | ■  | 14 |
| (N/G)×(N/R)                            | 0.25           | 0.19                | 0.81 | 0.30  | 0.71  | 0.73 | 0.72 | -0.19 | □ | ■  | ■  | 14 |

(1) Fadel et al., 2016; (2) Patra et al., 2015; (3) Tucker, 1979; (4) Ho et al., 2017; (5) Boucher et al., 2018; (6) Kabbara et al., 2008; (7) Trinh et al., 2017; (8) Alawadi et al., 2010; (9) Mayo et al., 1995; (10) Keith et al., 2018; (11) Chenet et al., 2013; (12) Singh et al., 2014; (13) Guan, 2009.

Kab1 = 1.67-3.94×ln(B)+3.78×ln(G)

NDVI = (N-R)/(N+R)

NRVI = [(R/NIR)-1]/[(R/NIR)+1]

SABI = (N-R)/(B+G)

**OC2=0.1977+(-1.8117(log10(BG)))1+(1.9743(log10(BG)))2+(2.5635(log10(BG)))3+(-0.7218(log10(BG)))4**

**Table S3e.** Chl-*a* retrieval algorithm results summary for OWT-E<sub>q</sub> after outlier removal. Parameters displayed are coefficient of determination ( $r^2$ ), p-value (p), root mean square error (RMSE; ( $\mu\text{g L}^{-1}$ )), root mean square log error (RMSLE), normalized root mean square error, mean absolute error (MAE, ( $\mu\text{g L}^{-1}$ )), median absolute percentage error (MAPE %), bias ( $\mu\text{g L}^{-1}$ ), Breusch-Pagan constant variance (CV), and Shapiro-Wilks normality (NM). Filled boxes indicate that the assumptions of linear regressions have been met ( $r^2 \geq 0.05$ , CV and NM  $p \geq 0.05$ ), empty boxes indicate that the assumptions have not been met.

| Algorithm                 | $r^2$ | Adj. $r^2$ | RMSE  | RMLSE | NRMSE | MAE   | MAPE | Bias  | p | CV | NM | n  |
|---------------------------|-------|------------|-------|-------|-------|-------|------|-------|---|----|----|----|
| B                         | 0.15  | 0.14       | 10.17 | 0.65  | 0.85  | 7.19  | 0.25 | -2.98 | ■ | ■  | ■  | 57 |
| G                         | 0.09  | 0.08       | 10.87 | 0.66  | 0.85  | 8.16  | 0.22 | -3.16 | ■ | ■  | ■  | 61 |
| R                         | 0.09  | 0.07       | 11.40 | 0.70  | 0.89  | 8.10  | 0.24 | -3.33 | ■ | ■  | ■  | 61 |
| N                         | 0.08  | 0.06       | 9.91  | 0.67  | 0.94  | 7.35  | 0.25 | -3.11 | ■ | ■  | ■  | 58 |
| B×G                       | 0.30  | 0.28       | 10.10 | 0.61  | 0.78  | 7.15  | 0.18 | -2.81 | ■ | ■  | ■  | 55 |
| B×R                       | 0.29  | 0.27       | 8.45  | 0.56  | 0.76  | 5.90  | 0.19 | -2.36 | ■ | ■  | ■  | 54 |
| B×N                       | 0.00  | -0.02      | 9.26  | 0.68  | 0.91  | 6.75  | 0.27 | -3.23 | □ | ■  | ■  | 59 |
| G×R                       | 0.16  | 0.15       | 10.95 | 0.65  | 0.85  | 7.99  | 0.24 | -3.27 | ■ | ■  | ■  | 58 |
| G×N                       | 0.04  | 0.02       | 11.07 | 0.65  | 0.89  | 8.11  | 0.24 | -3.90 | □ | ■  | ■  | 56 |
| R×N                       | 0.03  | 0.01       | 9.98  | 0.62  | 0.95  | 7.41  | 0.22 | -3.50 | □ | ■  | ■  | 55 |
| B/G                       | 0.05  | 0.03       | 14.47 | 0.76  | 0.83  | 9.84  | 0.28 | -6.06 | □ | ■  | ■  | 61 |
| B/R                       | 0.07  | 0.05       | 15.36 | 0.86  | 0.86  | 10.17 | 0.31 | -5.83 | ■ | ■  | ■  | 68 |
| B/N                       | 0.47  | 0.46       | 8.93  | 0.58  | 0.61  | 6.40  | 0.21 | -2.75 | ■ | ■  | ■  | 56 |
| G/B                       | 0.04  | 0.02       | 16.29 | 0.85  | 0.90  | 10.22 | 0.28 | -5.65 | □ | ■  | ■  | 65 |
| G/R                       | 0.00  | -0.01      | 16.42 | 0.87  | 0.91  | 10.70 | 0.27 | -6.16 | □ | ■  | ■  | 65 |
| G/N                       | 0.11  | 0.10       | 11.75 | 0.78  | 0.85  | 8.71  | 0.31 | -4.56 | ■ | ■  | ■  | 67 |
| R/B                       | 0.07  | 0.05       | 15.54 | 0.85  | 0.86  | 10.26 | 0.32 | -5.70 | ■ | ■  | ■  | 66 |
| R/G                       | 0.00  | -0.01      | 17.09 | 0.88  | 0.95  | 10.92 | 0.28 | -7.04 | □ | ■  | ■  | 68 |
| R/N                       | 0.18  | 0.17       | 10.67 | 0.70  | 0.84  | 8.10  | 0.29 | -3.34 | ■ | ■  | ■  | 63 |
| N/B                       | 0.36  | 0.35       | 11.14 | 0.67  | 0.72  | 7.87  | 0.23 | -4.19 | ■ | ■  | ■  | 61 |
| N/G                       | 0.17  | 0.16       | 11.69 | 0.73  | 0.86  | 8.50  | 0.29 | -4.35 | ■ | ■  | ■  | 65 |
| N/R                       | 0.20  | 0.19       | 10.80 | 0.71  | 0.80  | 8.53  | 0.29 | -3.96 | ■ | ■  | ■  | 65 |
| B×G×R <sup>1</sup>        | 0.33  | 0.32       | 9.16  | 0.56  | 0.71  | 6.92  | 0.18 | -2.70 | ■ | ■  | ■  | 54 |
| B×G×N <sup>1</sup>        | 0.03  | 0.02       | 9.08  | 0.64  | 0.89  | 6.77  | 0.25 | -2.64 | □ | ■  | ■  | 56 |
| B×R×N <sup>1</sup>        | 0.19  | 0.17       | 7.69  | 0.51  | 0.79  | 5.46  | 0.20 | -2.82 | ■ | ■  | ■  | 47 |
| G×R×N <sup>1</sup>        | 0.07  | 0.05       | 10.75 | 0.63  | 0.87  | 7.83  | 0.22 | -3.24 | ■ | ■  | ■  | 56 |
| Avg(B;G) <sup>1,2</sup>   | 0.22  | 0.21       | 8.79  | 0.60  | 0.80  | 6.52  | 0.20 | -2.69 | ■ | ■  | ■  | 56 |
| Avg(B;R) <sup>1,2</sup>   | 0.32  | 0.31       | 8.00  | 0.56  | 0.73  | 5.55  | 0.20 | -2.59 | ■ | ■  | ■  | 53 |
| Avg(B;N) <sup>1,2</sup>   | 0.03  | 0.01       | 9.22  | 0.67  | 0.93  | 6.45  | 0.25 | -3.40 | □ | ■  | ■  | 57 |
| Avg(G;R) <sup>1,2</sup>   | 0.09  | 0.07       | 10.50 | 0.67  | 0.82  | 7.99  | 0.26 | -2.78 | ■ | ■  | ■  | 61 |
| Avg(G;N) <sup>1,2</sup>   | 0.05  | 0.03       | 10.97 | 0.66  | 0.88  | 8.26  | 0.22 | -3.38 | □ | ■  | ■  | 56 |
| Avg(R;N) <sup>1,2</sup>   | 0.01  | -0.01      | 9.97  | 0.61  | 0.95  | 7.45  | 0.22 | -2.87 | □ | ■  | ■  | 54 |
| N-R <sup>3,4</sup>        | 0.24  | 0.23       | 11.23 | 0.69  | 0.83  | 8.44  | 0.29 | -3.20 | ■ | ■  | ■  | 64 |
| Kab1 <sup>5,6</sup>       | 0.05  | 0.03       | 13.91 | 0.76  | 0.80  | 9.71  | 0.31 | -5.48 | □ | ■  | ■  | 61 |
| NDVI                      | 0.20  | 0.19       | 10.98 | 0.72  | 0.81  | 8.39  | 0.30 | -4.80 | ■ | ■  | ■  | 65 |
| NRVI                      | 0.20  | 0.19       | 10.85 | 0.71  | 0.80  | 8.47  | 0.31 | -4.09 | ■ | ■  | ■  | 65 |
| OC2 <sup>7</sup>          | 0.03  | 0.01       | 14.45 | 0.82  | 0.84  | 9.67  | 0.26 | -5.17 | □ | ■  | ■  | 64 |
| SAB1 <sup>5,8</sup>       | 0.23  | 0.22       | 11.53 | 0.71  | 0.85  | 8.41  | 0.31 | -3.75 | ■ | ■  | ■  | 65 |
| (B-R)/G <sup>4,9</sup>    | 0.04  | 0.03       | 15.31 | 0.78  | 0.88  | 9.78  | 0.28 | -4.59 | □ | ■  | ■  | 61 |
| (N/G)+(N/B) <sup>10</sup> | 0.16  | 0.15       | 13.80 | 0.79  | 0.91  | 9.43  | 0.30 | -4.34 | ■ | ■  | ■  | 68 |
| G×(B+G+R)                 | 0.22  | 0.20       | 10.66 | 0.63  | 0.82  | 7.82  | 0.24 | -3.04 | ■ | ■  | ■  | 57 |

| Algorithm                              | r <sup>2</sup> | Adj. r <sup>2</sup> | RMSE  | RMLSE | NRMSE | MAE   | MAPE | Bias  | p | CV | NM | n  |
|----------------------------------------|----------------|---------------------|-------|-------|-------|-------|------|-------|---|----|----|----|
| [(1/B)-(1/G)]×N <sup>10</sup>          | 0.01           | -0.01               | 15.18 | 0.78  | 0.88  | 9.95  | 0.30 | -4.47 | □ | ■  | ■  | 62 |
| [(1/R)-(1/G)]×N <sup>10</sup>          | 0.06           | 0.05                | 14.41 | 0.78  | 0.95  | 9.72  | 0.23 | -4.26 | ■ | ■  | ■  | 64 |
| [(1/R)-(1/B)]×N <sup>10</sup>          | 0.02           | 0.00                | 14.50 | 0.77  | 0.85  | 10.31 | 0.28 | -5.24 | □ | ■  | ■  | 64 |
| [(1/R)-(0.2363×(1/G))]×N <sup>11</sup> | 0.24           | 0.22                | 10.58 | 0.68  | 0.78  | 8.52  | 0.28 | -3.50 | ■ | ■  | ■  | 64 |
| [(1/R)-(1/B)]/N <sup>12</sup>          | 0.00           | -0.01               | 13.96 | 0.85  | 0.97  | 9.21  | 0.29 | -5.75 | □ | ■  | ■  | 67 |
| (B/R)×N                                | 0.03           | 0.01                | 12.86 | 0.74  | 0.95  | 8.82  | 0.25 | -4.50 | □ | ■  | ■  | 61 |
| (G/R)×N                                | 0.05           | 0.04                | 11.43 | 0.74  | 0.92  | 8.22  | 0.27 | -3.70 | □ | ■  | ■  | 61 |
| (R/B)×N                                | 0.10           | 0.09                | 11.25 | 0.73  | 0.91  | 7.77  | 0.29 | -3.73 | ■ | ■  | ■  | 60 |
| (R/G)×N                                | 0.11           | 0.09                | 9.72  | 0.71  | 0.92  | 7.27  | 0.32 | -3.03 | ■ | ■  | ■  | 63 |
| (R×N)/B <sup>13</sup>                  | 0.10           | 0.09                | 10.26 | 0.71  | 0.83  | 7.77  | 0.27 | -3.73 | ■ | ■  | ■  | 60 |
| (B/G)×(B/R)                            | 0.01           | -0.01               | 9.22  | 0.66  | 0.88  | 6.82  | 0.24 | -2.88 | □ | ■  | ■  | 57 |
| (B/G)×(B/N)                            | 0.32           | 0.31                | 14.72 | 0.76  | 0.79  | 9.61  | 0.27 | -4.04 | ■ | ■  | ■  | 62 |
| (B/G)×(R/G)                            | 0.02           | 0.01                | 14.93 | 0.82  | 0.87  | 9.87  | 0.27 | -5.59 | □ | ■  | ■  | 64 |
| (B/G)×(R/N)                            | 0.41           | 0.40                | 6.63  | 0.56  | 0.64  | 5.17  | 0.24 | -1.93 | ■ | ■  | □  | 56 |
| (B/G)×(N/B)                            | 0.17           | 0.16                | 11.74 | 0.73  | 0.87  | 8.48  | 0.33 | -4.39 | ■ | ■  | ■  | 65 |
| (B/G)×(N/G)                            | 0.02           | 0.01                | 12.25 | 0.76  | 0.88  | 9.04  | 0.30 | -4.58 | □ | ■  | ■  | 65 |
| (B/G)×(N/R)                            | 0.02           | 0.00                | 12.46 | 0.77  | 0.90  | 8.94  | 0.27 | -4.32 | □ | ■  | ■  | 65 |
| (B/R)×(B/N)                            | 0.47           | 0.46                | 11.40 | 0.61  | 0.75  | 7.72  | 0.23 | -2.88 | ■ | ■  | ■  | 53 |
| (B/R)×(G/R)                            | 0.00           | -0.02               | 16.50 | 0.85  | 0.92  | 11.12 | 0.28 | -7.24 | □ | ■  | ■  | 67 |
| (B/R)×(G/N)                            | 0.31           | 0.29                | 11.70 | 0.70  | 0.78  | 8.51  | 0.23 | -4.82 | ■ | ■  | ■  | 59 |
| (B/R)×(N/R)                            | 0.03           | 0.02                | 12.63 | 0.73  | 0.91  | 9.07  | 0.29 | -3.75 | □ | ■  | ■  | 63 |
| (B/N)×(G/N)                            | 0.22           | 0.21                | 12.43 | 0.76  | 0.80  | 8.73  | 0.25 | -4.46 | ■ | ■  | ■  | 64 |
| (B/N)×(R/N)                            | 0.37           | 0.36                | 11.14 | 0.66  | 0.76  | 7.62  | 0.23 | -2.83 | ■ | ■  | ■  | 58 |
| (G/B)×(G/R)                            | 0.04           | 0.02                | 16.34 | 0.86  | 0.90  | 10.19 | 0.28 | -6.61 | □ | ■  | ■  | 66 |
| (G/B)×(G/N)                            | 0.02           | 0.00                | 12.87 | 0.78  | 0.93  | 8.77  | 0.28 | -4.83 | □ | ■  | ■  | 63 |
| (G/B)×(R/B)                            | 0.04           | 0.02                | 16.01 | 0.84  | 0.87  | 10.33 | 0.27 | -6.49 | □ | ■  | ■  | 63 |
| (G/B)×(R/N)                            | 0.00           | -0.02               | 13.20 | 0.82  | 0.96  | 8.48  | 0.30 | -4.75 | □ | ■  | ■  | 63 |
| (G/B)×(N/B)                            | 0.15           | 0.13                | 15.26 | 0.81  | 0.84  | 10.51 | 0.28 | -5.00 | ■ | ■  | ■  | 64 |
| (G/B)×(N/R)                            | 0.42           | 0.41                | 9.64  | 0.61  | 0.63  | 6.92  | 0.21 | -3.60 | ■ | ■  | □  | 57 |
| (G/R)×(G/N)                            | 0.09           | 0.08                | 13.46 | 0.82  | 0.79  | 10.35 | 0.30 | -5.42 | ■ | ■  | ■  | 68 |
| (G/R)×(N/R)                            | 0.15           | 0.13                | 12.87 | 0.74  | 0.87  | 9.10  | 0.28 | -5.03 | ■ | ■  | ■  | 64 |
| (G/N)×(R/N)                            | 0.16           | 0.15                | 10.96 | 0.72  | 0.86  | 8.28  | 0.31 | -3.68 | ■ | ■  | ■  | 63 |
| (R/B)×(R/G)                            | 0.00           | -0.02               | 17.10 | 0.85  | 0.95  | 11.43 | 0.26 | -6.27 | □ | ■  | ■  | 65 |
| (R/B)×(R/N)                            | 0.02           | 0.01                | 14.75 | 0.83  | 0.87  | 10.02 | 0.29 | -5.51 | □ | ■  | ■  | 68 |
| (R/B)×(N/B)                            | 0.14           | 0.13                | 15.43 | 0.81  | 0.85  | 10.37 | 0.28 | -6.30 | ■ | ■  | ■  | 65 |
| (R/B)×(N/G)                            | 0.18           | 0.17                | 15.65 | 0.83  | 0.87  | 10.46 | 0.27 | -5.78 | ■ | ■  | ■  | 69 |
| (R/G)×(R/N)                            | 0.09           | 0.08                | 11.68 | 0.72  | 0.88  | 8.12  | 0.25 | -3.83 | ■ | ■  | ■  | 62 |
| (R/G)×(N/G)                            | 0.09           | 0.08                | 12.35 | 0.79  | 0.89  | 8.83  | 0.31 | -4.19 | ■ | ■  | ■  | 67 |
| (N/B)×(N/G)                            | 0.23           | 0.22                | 12.72 | 0.74  | 0.85  | 8.82  | 0.27 | -4.06 | ■ | ■  | ■  | 66 |
| (N/B)×(N/R)                            | 0.38           | 0.37                | 11.96 | 0.68  | 0.78  | 8.07  | 0.25 | -3.49 | ■ | ■  | ■  | 61 |
| (N/G)×(N/R)                            | 0.21           | 0.19                | 11.75 | 0.72  | 0.86  | 8.37  | 0.32 | -3.67 | ■ | ■  | ■  | 64 |

(1) Fadel et al., 2016; (2) Patra et al., 2015; (3) Tucker, 1979; (4) Ho et al., 2017; (5) Boucher et al., 2018; (6) Kabbara et al., 2008; (7) Trinh et al., 2017; (8) Alawadi et al., 2010; (9) Mayo et al., 1995; (10) Keith et al., 2018; (11) Chenet et al., 2013; (12) Singh et al., 2014; (13) Guan, 2009.

Kab1 = 1.67-3.94×ln(B)+3.78×ln(G)

NDVI = (N-R)/(N+R)

NRVI = [(R/NIR)-1]/[(R/NIR)+1]

SABI = (N-R)/(B+G)

**OC2=0.1977+(-1.8117(log10(BG)))1+(1.9743(log10(BG)))2+(2.5635(log10(BG)))3+(-0.7218(log10(BG)))4**

**Table S3f.** Chl-*a* retrieval algorithm results summary for OWT-F<sub>q</sub> after outlier removal. Parameters displayed are coefficient of determination ( $r^2$ ), p-value (p), root mean square error (RMSE; ( $\mu\text{g L}^{-1}$ )), root mean square log error (RMSLE), normalized root mean square error, mean absolute error (MAE, ( $\mu\text{g L}^{-1}$ )), median absolute percentage error (MAPE %), bias ( $\mu\text{g L}^{-1}$ ), Breusch-Pagan constant variance (CV), and Shapiro-Wilks normality (NM). Filled boxes indicate that the assumptions of linear regressions have been met ( $r^2 \geq 0.05$ , CV and NM  $p \geq 0.05$ ), empty boxes indicate that the assumptions have not been met.

| Algorithm                 | $r^2$ | Adj. $r^2$ | RMSE  | RMSLE | NRMSE | MAE   | MAPE | Bias  | p | CV | NM | n  |
|---------------------------|-------|------------|-------|-------|-------|-------|------|-------|---|----|----|----|
| B                         | 0.56  | 0.53       | 7.04  | 0.68  | 0.54  | 5.68  | 1.11 | -2.54 | ■ | ■  | ■  | 17 |
| G                         | 0.37  | 0.33       | 10.25 | 0.86  | 0.76  | 8.42  | 1.13 | -5.19 | ■ | ■  | ■  | 18 |
| R                         | 0.54  | 0.50       | 11.29 | 0.80  | 0.62  | 10.27 | 1.14 | -5.60 | ■ | ■  | ■  | 17 |
| N                         | 0.53  | 0.50       | 8.23  | 0.69  | 0.59  | 6.79  | 1.09 | -3.32 | ■ | ■  | ■  | 17 |
| B×G                       | 0.57  | 0.54       | 7.75  | 0.67  | 0.57  | 7.07  | 0.71 | -3.49 | ■ | ■  | □  | 18 |
| B×R                       | 0.62  | 0.59       | 7.59  | 0.55  | 0.56  | 5.77  | 0.83 | -1.73 | ■ | ■  | ■  | 18 |
| B×N                       | 0.25  | 0.20       | 7.42  | 0.78  | 0.55  | 7.12  | 1.23 | -5.19 | ■ | ■  | ■  | 18 |
| G×R                       | 0.48  | 0.44       | 10.99 | 0.77  | 0.61  | 10.11 | 0.85 | -6.14 | ■ | ■  | □  | 17 |
| G×N                       | 0.08  | 0.03       | 12.06 | 1.05  | 0.70  | 10.17 | 1.83 | -7.01 | □ | ■  | ■  | 19 |
| R×N                       | 0.07  | 0.01       | 11.95 | 1.02  | 0.70  | 10.68 | 1.88 | -8.00 | □ | ■  | ■  | 17 |
| B/G                       | 0.12  | 0.06       | 11.79 | 0.99  | 0.67  | 9.92  | 1.37 | -6.86 | □ | ■  | ■  | 17 |
| B/R                       | 0.29  | 0.24       | 13.42 | 0.93  | 0.76  | 12.27 | 1.19 | -8.42 | ■ | ■  | ■  | 18 |
| B/N                       | 0.51  | 0.47       | 7.36  | 0.64  | 0.56  | 6.32  | 1.00 | -1.31 | ■ | ■  | ■  | 17 |
| G/B                       | 0.12  | 0.07       | 12.51 | 1.04  | 0.72  | 10.18 | 1.31 | -6.56 | □ | ■  | ■  | 17 |
| G/R                       | 0.45  | 0.42       | 10.83 | 0.83  | 0.62  | 8.88  | 1.97 | -4.97 | ■ | ■  | ■  | 18 |
| G/N                       | 0.59  | 0.56       | 5.91  | 0.55  | 0.45  | 4.64  | 0.89 | -2.15 | ■ | ■  | ■  | 17 |
| R/B                       | 0.27  | 0.23       | 12.82 | 0.94  | 0.73  | 10.43 | 1.17 | -6.11 | ■ | ■  | ■  | 18 |
| R/G                       | 0.48  | 0.45       | 11.32 | 0.80  | 0.64  | 9.35  | 1.40 | -5.81 | ■ | ■  | ■  | 18 |
| R/N                       | 0.93  | 0.92       | 1.55  | 0.18  | 0.15  | 1.54  | 0.51 | -0.11 | ■ | ■  | ■  | 13 |
| N/B                       | 0.54  | 0.51       | 6.73  | 0.63  | 0.50  | 5.61  | 1.12 | -3.52 | ■ | ■  | ■  | 18 |
| N/G                       | 0.60  | 0.57       | 7.62  | 0.67  | 0.56  | 6.23  | 1.24 | -3.42 | ■ | ■  | ■  | 18 |
| N/R                       | 0.72  | 0.70       | 7.32  | 0.54  | 0.54  | 6.65  | 0.97 | -3.91 | ■ | ■  | ■  | 18 |
| B×G×R <sup>1</sup>        | 0.55  | 0.52       | 7.99  | 0.62  | 0.59  | 6.46  | 0.80 | -2.89 | ■ | ■  | ■  | 18 |
| B×G×N <sup>1</sup>        | 0.03  | -0.04      | 7.34  | 0.82  | 0.49  | 6.16  | 1.79 | -4.00 | □ | ■  | ■  | 16 |
| B×R×N <sup>1</sup>        | 0.13  | 0.07       | 9.46  | 0.91  | 0.64  | 9.16  | 1.17 | -7.07 | □ | ■  | ■  | 16 |
| G×R×N <sup>1</sup>        | 0.01  | -0.05      | 13.37 | 1.10  | 0.77  | 10.70 | 2.12 | -7.37 | □ | ■  | ■  | 19 |
| Avg(B;G) <sup>1,2</sup>   | 0.58  | 0.55       | 8.34  | 0.68  | 0.61  | 7.54  | 0.72 | -3.12 | ■ | ■  | □  | 18 |
| Avg(B;R) <sup>1,2</sup>   | 0.64  | 0.61       | 5.83  | 0.50  | 0.43  | 5.02  | 0.85 | -2.82 | ■ | ■  | ■  | 17 |
| Avg(B;N) <sup>1,2</sup>   | 0.06  | -0.01      | 11.91 | 1.02  | 0.67  | 10.85 | 1.50 | -8.38 | □ | ■  | ■  | 16 |
| Avg(G;R) <sup>1,2</sup>   | 0.94  | 0.94       | 2.22  | 0.20  | 0.16  | 2.06  | 0.32 | -1.22 | ■ | ■  | ■  | 13 |
| Avg(G;N) <sup>1,2</sup>   | 0.06  | 0.01       | 13.18 | 1.07  | 0.76  | 10.40 | 1.73 | -7.44 | □ | ■  | ■  | 19 |
| Avg(R;N) <sup>1,2</sup>   | 0.01  | -0.06      | 7.09  | 0.87  | 0.58  | 5.59  | 1.53 | -3.60 | □ | ■  | ■  | 16 |
| N-R <sup>3,4</sup>        | 0.72  | 0.70       | 6.91  | 0.49  | 0.51  | 5.57  | 0.86 | -2.20 | ■ | ■  | ■  | 18 |
| Kab1 <sup>5,6</sup>       | 0.11  | 0.05       | 10.87 | 0.94  | 0.62  | 9.12  | 1.42 | -5.75 | □ | ■  | ■  | 17 |
| NDVI                      | 0.84  | 0.83       | 2.87  | 0.30  | 0.30  | 2.43  | 0.52 | -0.42 | ■ | ■  | ■  | 15 |
| NRVI                      | 0.84  | 0.83       | 2.96  | 0.32  | 0.31  | 2.49  | 0.72 | -0.25 | ■ | ■  | ■  | 15 |
| OC2 <sup>7</sup>          | 0.12  | 0.06       | 10.51 | 0.99  | 0.60  | 9.96  | 1.55 | -6.83 | □ | ■  | ■  | 17 |
| SAB1 <sup>5,8</sup>       | 0.70  | 0.69       | 7.13  | 0.54  | 0.53  | 5.85  | 0.89 | -2.51 | ■ | ■  | ■  | 18 |
| (B-R)/G <sup>4,9</sup>    | 0.19  | 0.14       | 11.62 | 0.92  | 0.66  | 9.77  | 0.95 | -7.14 | □ | ■  | ■  | 17 |
| (N/G)+(N/B) <sup>10</sup> | 0.59  | 0.56       | 6.51  | 0.64  | 0.48  | 5.38  | 0.80 | -2.90 | ■ | ■  | ■  | 18 |
| G×(B+G+R)                 | 0.98  | 0.98       | 0.88  | 0.10  | 0.07  | 0.87  | 0.34 | -0.29 | ■ | ■  | ■  | 13 |

| Algorithm                              | r <sup>2</sup> | Adj. r <sup>2</sup> | RMSE  | RMLSE | NRMSE | MAE   | MAPE | Bias  | p | CV | NM | n  |
|----------------------------------------|----------------|---------------------|-------|-------|-------|-------|------|-------|---|----|----|----|
| [(1/B)-(1/G)]×N <sup>10</sup>          | 0.21           | 0.16                | 13.41 | 1.03  | 0.76  | 11.79 | 1.32 | -7.98 | □ | ■  | ■  | 18 |
| [(1/R)-(1/G)]×N <sup>10</sup>          | 0.80           | 0.78                | 5.46  | 0.38  | 0.40  | 4.71  | 0.27 | -2.40 | ■ | ■  | ■  | 17 |
| [(1/R)-(1/B)]×N <sup>10</sup>          | 0.56           | 0.54                | 10.68 | 0.70  | 0.61  | 8.73  | 0.91 | -4.22 | ■ | ■  | □  | 18 |
| [(1/R)-(0.2363×(1/G))]×N <sup>11</sup> | 0.73           | 0.71                | 5.97  | 0.47  | 0.44  | 4.75  | 0.92 | -2.12 | ■ | ■  | ■  | 18 |
| [(1/R)-(1/B)]/N <sup>12</sup>          | 0.06           | 0.00                | 11.47 | 0.96  | 0.67  | 9.03  | 1.68 | -6.21 | □ | ■  | ■  | 18 |
| (B/R)×N                                | 0.04           | -0.02               | 13.39 | 1.08  | 0.77  | 11.45 | 1.72 | -8.55 | □ | ■  | ■  | 19 |
| (G/R)×N                                | 0.68           | 0.66                | 6.95  | 0.54  | 0.51  | 5.49  | 0.96 | -1.38 | ■ | ■  | □  | 18 |
| (R/B)×N                                | 0.11           | 0.05                | 9.27  | 0.98  | 0.68  | 8.05  | 2.10 | -4.66 | □ | ■  | ■  | 18 |
| (R/G)×N                                | 0.18           | 0.13                | 10.58 | 0.97  | 0.78  | 9.54  | 1.30 | -6.83 | □ | ■  | ■  | 18 |
| (R×N)/B <sup>13</sup>                  | 0.11           | 0.05                | 9.66  | 0.97  | 0.71  | 7.83  | 1.90 | -4.88 | □ | ■  | ■  | 18 |
| (B/G)×(B/R)                            | 0.18           | 0.12                | 13.45 | 1.00  | 0.76  | 10.83 | 1.43 | -7.13 | □ | ■  | ■  | 18 |
| (B/G)×(B/N)                            | 0.44           | 0.41                | 6.89  | 0.70  | 0.51  | 5.57  | 1.30 | -2.58 | ■ | ■  | ■  | 18 |
| (B/G)×(R/G)                            | 0.24           | 0.19                | 11.58 | 0.96  | 0.67  | 9.52  | 1.51 | -7.30 | ■ | ■  | ■  | 19 |
| (B/G)×(R/N)                            | 0.68           | 0.66                | 1.92  | 0.38  | 0.30  | 1.85  | 0.75 | -0.71 | ■ | ■  | □  | 15 |
| (B/G)×(N/B)                            | 0.60           | 0.57                | 6.50  | 0.62  | 0.48  | 5.49  | 1.03 | -2.66 | ■ | ■  | ■  | 18 |
| (B/G)×(N/G)                            | 0.63           | 0.61                | 7.47  | 0.56  | 0.53  | 6.28  | 0.96 | -3.70 | ■ | ■  | ■  | 17 |
| (B/G)×(N/R)                            | 0.86           | 0.84                | 0.46  | 0.15  | 0.14  | 0.45  | 0.29 | -0.14 | ■ | ■  | ■  | 12 |
| (B/R)×(B/N)                            | 0.24           | 0.19                | 9.08  | 0.87  | 0.67  | 7.69  | 1.36 | -5.28 | ■ | ■  | ■  | 18 |
| (B/R)×(G/R)                            | 0.37           | 0.33                | 13.43 | 0.90  | 0.76  | 11.81 | 1.17 | -7.99 | ■ | ■  | ■  | 18 |
| (B/R)×(G/N)                            | 0.30           | 0.26                | 7.36  | 0.81  | 0.54  | 6.74  | 1.32 | -3.41 | ■ | ■  | ■  | 18 |
| (B/R)×(N/R)                            | 0.85           | 0.84                | 0.50  | 0.16  | 0.16  | 0.50  | 0.41 | -0.19 | ■ | ■  | ■  | 12 |
| (B/N)×(G/N)                            | 0.36           | 0.30                | 2.12  | 0.48  | 0.63  | 2.03  | 0.86 | -1.10 | ■ | ■  | ■  | 14 |
| (B/N)×(R/N)                            | 0.58           | 0.55                | 1.71  | 0.39  | 0.27  | 1.63  | 0.71 | -0.79 | ■ | ■  | ■  | 14 |
| (G/B)×(G/R)                            | 0.22           | 0.18                | 11.10 | 0.93  | 0.64  | 9.11  | 2.00 | -5.97 | ■ | ■  | ■  | 19 |
| (G/B)×(G/N)                            | 0.29           | 0.21                | 0.70  | 0.26  | 0.68  | 0.66  | 0.82 | -0.09 | □ | ■  | ■  | 11 |
| (G/B)×(R/B)                            | 0.17           | 0.12                | 12.51 | 0.98  | 0.71  | 10.25 | 1.26 | -6.15 | □ | ■  | ■  | 18 |
| (G/B)×(R/N)                            | 0.91           | 0.90                | 1.01  | 0.21  | 0.10  | 1.00  | 0.48 | -0.43 | ■ | ■  | ■  | 12 |
| (G/B)×(N/B)                            | 0.38           | 0.34                | 7.85  | 0.79  | 0.58  | 6.91  | 1.44 | -4.37 | ■ | ■  | ■  | 18 |
| (G/B)×(N/R)                            | 0.92           | 0.91                | 1.86  | 0.23  | 0.17  | 1.68  | 0.63 | -0.13 | ■ | ■  | ■  | 14 |
| (G/R)×(G/N)                            | 0.26           | 0.22                | 7.96  | 0.77  | 0.61  | 6.51  | 1.26 | -3.80 | ■ | ■  | ■  | 17 |
| (G/R)×(N/R)                            | 0.74           | 0.72                | 5.52  | 0.43  | 0.41  | 4.43  | 0.80 | -2.25 | ■ | ■  | ■  | 18 |
| (G/N)×(R/N)                            | 0.90           | 0.89                | 0.67  | 0.15  | 0.10  | 0.66  | 0.45 | -0.29 | ■ | ■  | ■  | 12 |
| (R/B)×(R/G)                            | 0.36           | 0.32                | 12.56 | 0.89  | 0.71  | 10.42 | 1.21 | -4.79 | ■ | ■  | ■  | 18 |
| (R/B)×(R/N)                            | 0.92           | 0.91                | 0.99  | 0.17  | 0.07  | 0.86  | 0.46 | 0.10  | ■ | ■  | ■  | 12 |
| (R/B)×(N/B)                            | 0.19           | 0.14                | 10.29 | 0.97  | 0.76  | 8.67  | 1.58 | -5.56 | □ | ■  | ■  | 18 |
| (R/B)×(N/G)                            | 0.30           | 0.25                | 9.39  | 0.86  | 0.69  | 7.98  | 1.36 | -5.01 | ■ | ■  | ■  | 18 |
| (R/G)×(R/N)                            | 0.83           | 0.81                | 1.32  | 0.27  | 0.14  | 1.24  | 0.76 | -0.40 | ■ | ■  | ■  | 14 |
| (R/G)×(N/G)                            | 0.38           | 0.34                | 9.10  | 0.85  | 0.67  | 7.58  | 1.37 | -4.77 | ■ | ■  | ■  | 18 |
| (N/B)×(N/G)                            | 0.60           | 0.57                | 6.84  | 0.64  | 0.48  | 5.42  | 1.35 | -3.25 | ■ | ■  | ■  | 16 |
| (N/B)×(N/R)                            | 0.71           | 0.69                | 5.95  | 0.46  | 0.42  | 4.92  | 0.89 | -2.36 | ■ | ■  | ■  | 16 |
| (N/G)×(N/R)                            | 0.61           | 0.58                | 6.27  | 0.58  | 0.46  | 5.31  | 1.17 | -2.51 | ■ | ■  | ■  | 17 |

(1) Fadel et al., 2016; (2) Patra et al., 2015; (3) Tucker, 1979; (4) Ho et al., 2017; (5) Boucher et al., 2018; (6) Kabbara et al., 2008; (7) Trinh et al., 2017; (8) Alawadi et al., 2010; (9) Mayo et al., 1995; (10) Keith et al., 2018; (11) Chenet et al., 2013; (12) Singh et al., 2014; (13) Guan, 2009.

Kab1 = 1.67-3.94×ln(B)+3.78×ln(G)

NDVI = (N-R)/(N+R)

NRVI = [(R/NIR)-1]/[(R/NIR)+1]

SABI = (N-R)/(B+G)

**OC2=0.1977+(-1.8117(log10(BG)))1+(1.9743(log10(BG)))2+(2.5635(log10(BG)))3+(-0.7218(log10(BG)))4**

**Table S3g.** Chl-*a* retrieval algorithm results summary for OWT-G<sub>q</sub> after outlier removal. Parameters displayed are coefficient of determination ( $r^2$ ), p-value (p), root mean square error (RMSE; ( $\mu\text{g L}^{-1}$ )), root mean square log error (RMSLE), normalized root mean square error, mean absolute error (MAE, ( $\mu\text{g L}^{-1}$ )), median absolute percentage error (MAPE %), bias ( $\mu\text{g L}^{-1}$ ), Breusch-Pagan constant variance (CV), and Shapiro-Wilks normality (NM). Filled boxes indicate that the assumptions of linear regressions have been met ( $r^2 \geq 0.05$ , CV and NM  $p \geq 0.05$ ), empty boxes indicate that the assumptions have not been met.

| Algorithm                 | $r^2$ | Adj. $r^2$ | RMSE | RMLSE | NRMSE | MAE  | MAPE | Bias  | p | CV | NM | n  |
|---------------------------|-------|------------|------|-------|-------|------|------|-------|---|----|----|----|
| B                         | 0.04  | 0.01       | 4.27 | 0.69  | 0.85  | 3.15 | 1.16 | -1.77 | □ | ■  | ■  | 30 |
| G                         | 0.01  | -0.03      | 2.45 | 0.55  | 0.78  | 1.97 | 1.28 | -0.87 | □ | ■  | ■  | 27 |
| R                         | 0.18  | 0.15       | 4.02 | 0.64  | 0.79  | 3.02 | 1.50 | -1.65 | ■ | ■  | ■  | 31 |
| N                         | 0.28  | 0.25       | 4.38 | 0.60  | 0.79  | 3.54 | 0.83 | -1.52 | ■ | ■  | ■  | 29 |
| B×G                       | 0.00  | -0.03      | 2.49 | 0.54  | 0.80  | 1.99 | 1.81 | -0.89 | □ | ■  | ■  | 28 |
| B×R                       | 0.02  | -0.01      | 2.56 | 0.57  | 0.82  | 1.99 | 1.32 | -0.81 | □ | ■  | ■  | 28 |
| B×N                       | 0.01  | -0.02      | 4.93 | 0.73  | 0.90  | 3.54 | 1.39 | -1.78 | □ | ■  | ■  | 31 |
| G×R                       | 0.01  | -0.03      | 2.33 | 0.54  | 0.75  | 2.03 | 0.96 | -1.07 | □ | ■  | ■  | 28 |
| G×N                       | 0.05  | 0.01       | 4.47 | 0.67  | 0.84  | 3.30 | 1.54 | -1.83 | □ | ■  | ■  | 30 |
| R×N                       | 0.01  | -0.02      | 3.45 | 0.60  | 0.70  | 2.91 | 1.23 | -1.64 | □ | ■  | ■  | 29 |
| B/G                       | 0.08  | 0.05       | 4.02 | 0.66  | 0.80  | 3.18 | 1.33 | -1.61 | □ | ■  | ■  | 29 |
| B/R                       | 0.05  | 0.01       | 4.32 | 0.68  | 0.84  | 3.18 | 1.25 | -1.61 | □ | ■  | ■  | 29 |
| B/N                       | 0.51  | 0.49       | 4.28 | 0.57  | 0.72  | 3.35 | 1.09 | -1.30 | ■ | ■  | ■  | 25 |
| G/B                       | 0.14  | 0.11       | 3.65 | 0.62  | 0.75  | 3.04 | 1.22 | -1.67 | ■ | ■  | ■  | 28 |
| G/R                       | 0.11  | 0.08       | 4.14 | 0.65  | 0.81  | 3.13 | 1.19 | -1.91 | □ | ■  | ■  | 29 |
| G/N                       | 0.30  | 0.28       | 3.60 | 0.61  | 0.64  | 3.23 | 0.68 | -1.39 | ■ | ■  | ■  | 28 |
| R/B                       | 0.01  | -0.02      | 4.07 | 0.68  | 0.75  | 3.25 | 1.21 | -1.77 | □ | ■  | ■  | 32 |
| R/G                       | 0.19  | 0.16       | 4.06 | 0.63  | 0.78  | 3.03 | 1.09 | -1.46 | ■ | ■  | ■  | 29 |
| R/N                       | 0.64  | 0.62       | 2.52 | 0.43  | 0.46  | 2.22 | 0.80 | -0.99 | ■ | ■  | ■  | 25 |
| N/B                       | 0.47  | 0.45       | 4.12 | 0.56  | 0.69  | 3.40 | 0.97 | -1.38 | ■ | ■  | ■  | 24 |
| N/G                       | 0.21  | 0.18       | 4.15 | 0.65  | 0.75  | 3.48 | 1.09 | -1.75 | ■ | ■  | ■  | 30 |
| N/R                       | 0.60  | 0.58       | 3.27 | 0.48  | 0.60  | 2.79 | 0.86 | -1.23 | ■ | ■  | ■  | 25 |
| B×G×R <sup>1</sup>        | 0.01  | -0.03      | 2.61 | 0.56  | 0.84  | 2.10 | 1.60 | -1.23 | □ | ■  | ■  | 28 |
| B×G×N <sup>1</sup>        | 0.01  | -0.02      | 3.77 | 0.63  | 0.79  | 2.91 | 0.96 | -1.61 | □ | ■  | ■  | 30 |
| B×R×N <sup>1</sup>        | 0.00  | -0.03      | 2.96 | 0.58  | 0.70  | 2.47 | 1.35 | -1.41 | □ | ■  | ■  | 28 |
| G×R×N <sup>1</sup>        | 0.01  | -0.04      | 2.55 | 0.51  | 0.80  | 2.19 | 1.95 | -1.14 | □ | ■  | ■  | 24 |
| Avg(B;G) <sup>1,2</sup>   | 0.02  | -0.02      | 4.39 | 0.71  | 0.89  | 3.17 | 1.48 | -1.65 | □ | ■  | ■  | 31 |
| Avg(B;R) <sup>1,2</sup>   | 0.07  | 0.03       | 3.35 | 0.62  | 0.75  | 2.76 | 1.45 | -1.46 | □ | ■  | ■  | 30 |
| Avg(B;N) <sup>1,2</sup>   | 0.00  | -0.03      | 5.03 | 0.76  | 0.93  | 3.51 | 3.21 | -2.09 | □ | ■  | ■  | 32 |
| Avg(G;R) <sup>1,2</sup>   | 0.01  | -0.03      | 2.46 | 0.55  | 0.79  | 2.04 | 1.30 | -1.01 | □ | ■  | ■  | 28 |
| Avg(G;N) <sup>1,2</sup>   | 0.20  | 0.17       | 2.19 | 0.46  | 0.69  | 1.82 | 1.23 | -0.62 | ■ | ■  | ■  | 25 |
| Avg(R;N) <sup>1,2</sup>   | 0.09  | 0.05       | 3.52 | 0.60  | 0.70  | 2.80 | 0.93 | -1.43 | □ | ■  | ■  | 27 |
| N-R <sup>3,4</sup>        | 0.49  | 0.47       | 3.26 | 0.52  | 0.58  | 2.81 | 2.95 | -1.15 | ■ | ■  | ■  | 28 |
| Kab1 <sup>5,6</sup>       | 0.10  | 0.07       | 4.24 | 0.67  | 0.84  | 3.17 | 0.95 | -1.76 | □ | ■  | ■  | 29 |
| NDVI                      | 0.66  | 0.65       | 2.37 | 0.40  | 0.43  | 2.09 | 0.62 | -0.93 | ■ | ■  | ■  | 24 |
| NRVI                      | 0.66  | 0.65       | 2.55 | 0.43  | 0.46  | 2.15 | 1.01 | -0.72 | ■ | ■  | ■  | 24 |
| OC2 <sup>7</sup>          | 0.15  | 0.12       | 3.07 | 0.58  | 0.62  | 2.80 | 1.45 | -1.32 | ■ | ■  | ■  | 27 |
| SAB1 <sup>5,8</sup>       | 0.29  | 0.27       | 4.52 | 0.63  | 0.82  | 3.35 | 0.87 | -1.60 | ■ | ■  | ■  | 30 |
| (B-R)/G <sup>4,9</sup>    | 0.01  | -0.03      | 3.56 | 0.64  | 0.80  | 3.02 | 3.05 | -1.77 | □ | ■  | ■  | 29 |
| (N/G)+(N/B) <sup>10</sup> | 0.26  | 0.24       | 4.63 | 0.64  | 0.83  | 3.43 | 0.90 | -1.75 | ■ | ■  | ■  | 29 |
| G×(B+G+R)                 | 0.00  | -0.04      | 2.61 | 0.57  | 0.84  | 2.16 | 1.43 | -0.93 | □ | ■  | ■  | 28 |



| Algorithm                              | r <sup>2</sup> | Adj. r <sup>2</sup> | RMSE | RMLSE | NRMSE | MAE  | MAPE | Bias  | p | CV | NM | n  |
|----------------------------------------|----------------|---------------------|------|-------|-------|------|------|-------|---|----|----|----|
| [(1/B)-(1/G)]×N <sup>10</sup>          | 0.01           | -0.02               | 4.74 | 0.74  | 0.87  | 3.56 | 1.56 | -1.59 | □ | ■  | ■  | 32 |
| [(1/R)-(1/G)]×N <sup>10</sup>          | 0.36           | 0.34                | 3.76 | 0.56  | 0.74  | 2.96 | 1.06 | -1.30 | ■ | ■  | ■  | 30 |
| [(1/R)-(1/B)]×N <sup>10</sup>          | 0.26           | 0.24                | 4.28 | 0.64  | 0.82  | 3.23 | 1.00 | -1.45 | ■ | ■  | ■  | 29 |
| [(1/R)-(0.2363×(1/G))]×N <sup>11</sup> | 0.61           | 0.59                | 2.98 | 0.45  | 0.55  | 2.50 | 0.76 | -1.01 | ■ | ■  | ■  | 25 |
| [(1/R)-(1/B)]/N <sup>12</sup>          | 0.01           | -0.03               | 4.15 | 0.68  | 0.80  | 3.16 | 1.24 | -1.68 | □ | ■  | ■  | 28 |
| (B/R)×N                                | 0.02           | -0.02               | 4.27 | 0.68  | 0.86  | 3.16 | 1.36 | -1.76 | □ | ■  | ■  | 30 |
| (G/R)×N                                | 0.25           | 0.22                | 4.34 | 0.60  | 0.79  | 3.40 | 0.84 | -1.67 | ■ | ■  | ■  | 30 |
| (R/B)×N                                | 0.13           | 0.10                | 4.61 | 0.70  | 0.82  | 3.66 | 1.51 | -2.17 | ■ | ■  | ■  | 29 |
| (R/G)×N                                | 0.17           | 0.14                | 4.84 | 0.68  | 0.87  | 3.59 | 0.98 | -1.70 | ■ | ■  | ■  | 29 |
| (R×N)/B <sup>13</sup>                  | 0.13           | 0.10                | 4.74 | 0.70  | 0.85  | 3.61 | 1.35 | -2.14 | ■ | ■  | ■  | 29 |
| (B/G)×(B/R)                            | 0.00           | -0.03               | 3.75 | 0.65  | 0.85  | 2.75 | 2.64 | -1.51 | □ | ■  | ■  | 29 |
| (B/G)×(B/N)                            | 0.45           | 0.43                | 4.51 | 0.59  | 0.77  | 3.48 | 0.75 | -1.50 | ■ | ■  | ■  | 26 |
| (B/G)×(R/G)                            | 0.12           | 0.09                | 4.03 | 0.64  | 0.82  | 3.06 | 1.77 | -1.59 | □ | ■  | ■  | 30 |
| (B/G)×(R/N)                            | 0.68           | 0.67                | 2.84 | 0.43  | 0.51  | 2.40 | 1.04 | -1.16 | ■ | ■  | ■  | 24 |
| (B/G)×(N/B)                            | 0.21           | 0.18                | 4.25 | 0.65  | 0.77  | 3.48 | 1.49 | -1.75 | ■ | ■  | ■  | 30 |
| (B/G)×(N/G)                            | 0.18           | 0.15                | 4.70 | 0.68  | 0.84  | 3.69 | 0.71 | -1.76 | ■ | ■  | ■  | 29 |
| (B/G)×(N/R)                            | 0.23           | 0.20                | 3.96 | 0.63  | 0.77  | 3.02 | 1.76 | -1.56 | ■ | ■  | ■  | 30 |
| (B/R)×(B/N)                            | 0.33           | 0.30                | 4.41 | 0.64  | 0.75  | 3.62 | 0.85 | -1.93 | ■ | ■  | ■  | 26 |
| (B/R)×(G/R)                            | 0.09           | 0.05                | 4.11 | 0.62  | 0.80  | 3.11 | 1.25 | -1.64 | □ | ■  | ■  | 29 |
| (B/R)×(G/N)                            | 0.24           | 0.21                | 4.30 | 0.63  | 0.76  | 3.53 | 0.99 | -1.62 | ■ | ■  | □  | 28 |
| (B/R)×(N/R)                            | 0.33           | 0.30                | 3.78 | 0.60  | 0.74  | 2.91 | 1.12 | -1.43 | ■ | ■  | ■  | 30 |
| (B/N)×(G/N)                            | 0.36           | 0.34                | 3.91 | 0.58  | 0.68  | 3.13 | 1.25 | -1.58 | ■ | ■  | ■  | 27 |
| (B/N)×(R/N)                            | 0.43           | 0.40                | 3.71 | 0.56  | 0.65  | 3.03 | 0.90 | -1.24 | ■ | ■  | ■  | 27 |
| (G/B)×(G/R)                            | 0.14           | 0.10                | 4.30 | 0.67  | 0.86  | 3.19 | 1.66 | -1.53 | ■ | ■  | ■  | 29 |
| (G/B)×(G/N)                            | 0.04           | 0.00                | 3.32 | 0.61  | 0.77  | 2.74 | 1.09 | -1.35 | □ | ■  | ■  | 28 |
| (G/B)×(R/B)                            | 0.00           | -0.03               | 4.77 | 0.74  | 0.88  | 3.57 | 1.14 | -2.16 | □ | ■  | ■  | 32 |
| (G/B)×(R/N)                            | 0.30           | 0.28                | 3.59 | 0.59  | 0.69  | 2.88 | 1.03 | -1.66 | ■ | ■  | ■  | 29 |
| (G/B)×(N/B)                            | 0.36           | 0.33                | 4.74 | 0.64  | 0.82  | 3.70 | 1.10 | -1.08 | ■ | ■  | ■  | 26 |
| (G/B)×(N/R)                            | 0.61           | 0.60                | 3.59 | 0.47  | 0.65  | 2.75 | 1.22 | -1.50 | ■ | ■  | ■  | 25 |
| (G/R)×(G/N)                            | 0.13           | 0.09                | 4.29 | 0.67  | 0.78  | 3.62 | 0.97 | -1.85 | □ | ■  | □  | 30 |
| (G/R)×(N/R)                            | 0.38           | 0.36                | 3.60 | 0.56  | 0.70  | 2.88 | 0.94 | -1.36 | ■ | ■  | ■  | 30 |
| (G/N)×(R/N)                            | 0.46           | 0.44                | 2.89 | 0.53  | 0.55  | 2.28 | 1.28 | -0.82 | ■ | ■  | ■  | 27 |
| (R/B)×(R/G)                            | 0.26           | 0.23                | 3.86 | 0.59  | 0.73  | 2.99 | 1.63 | -1.37 | ■ | ■  | ■  | 27 |
| (R/B)×(R/N)                            | 0.39           | 0.37                | 3.24 | 0.56  | 0.62  | 2.55 | 0.93 | -1.29 | ■ | ■  | ■  | 29 |
| (R/B)×(N/B)                            | 0.25           | 0.22                | 4.52 | 0.65  | 0.78  | 3.45 | 2.24 | -1.37 | ■ | ■  | ■  | 26 |
| (R/B)×(N/G)                            | 0.14           | 0.11                | 4.37 | 0.67  | 0.79  | 3.50 | 1.35 | -1.90 | ■ | ■  | □  | 30 |
| (R/G)×(R/N)                            | 0.44           | 0.42                | 3.30 | 0.53  | 0.64  | 2.68 | 0.77 | -1.17 | ■ | ■  | ■  | 30 |
| (R/G)×(N/G)                            | 0.17           | 0.14                | 4.72 | 0.66  | 0.84  | 3.47 | 1.01 | -1.86 | ■ | ■  | □  | 29 |
| (N/B)×(N/G)                            | 0.21           | 0.18                | 4.59 | 0.65  | 0.83  | 3.45 | 1.75 | -1.81 | ■ | ■  | ■  | 30 |
| (N/B)×(N/R)                            | 0.28           | 0.25                | 4.07 | 0.62  | 0.72  | 3.42 | 1.12 | -1.77 | ■ | ■  | ■  | 29 |
| (N/G)×(N/R)                            | 0.23           | 0.20                | 4.03 | 0.61  | 0.73  | 3.47 | 1.42 | -1.75 | ■ | ■  | ■  | 30 |

(1) Fadel et al., 2016; (2) Patra et al., 2015; (3) Tucker, 1979; (4) Ho et al., 2017; (5) Boucher et al., 2018; (6) Kabbara et al., 2008; (7) Trinh et al., 2017; (8) Alawadi et al., 2010; (9) Mayo et al., 1995; (10) Keith et al., 2018; (11) Chenet et al., 2013; (12) Singh et al., 2014; (13) Guan, 2009.

Kab1 = 1.67-3.94×ln(B)+3.78×ln(G)

NDVI = (N-R)/(N+R)

NRVI = [(R/NIR)-1]/[(R/NIR)+1]

SABI = (N-R)/(B+G)

**OC2=0.1977+(-1.8117(log10(BG)))1+(1.9743(log10(BG)))2+(2.5635(log10(BG)))3+(-0.7218(log10(BG)))4**

| OWT            | A <sub>h</sub> | B <sub>h</sub> | C <sub>h</sub> | D <sub>h</sub> | E <sub>h</sub> | F <sub>h</sub> | G <sub>h</sub> | Global |
|----------------|----------------|----------------|----------------|----------------|----------------|----------------|----------------|--------|
| A <sub>h</sub> | 1.00           |                |                |                |                |                |                |        |
| B <sub>h</sub> | -0.02          | 1.00           |                |                |                |                |                |        |
| C <sub>h</sub> | 0.02           | 0.05           | 1.00           |                |                |                |                |        |
| D <sub>h</sub> | -0.36          | 0.33           | -0.30          | 1.00           |                |                |                |        |
| E <sub>h</sub> | -0.05          | 0.02           | -0.22          | 0.43           | 1.00           |                |                |        |
| F <sub>h</sub> | -0.20          | 0.29           | -0.20          | 0.75           | 0.51           | 1.00           |                |        |
| G <sub>h</sub> | -0.16          | -0.02          | -0.21          | 0.49           | 0.73           | 0.51           | 1.00           |        |
| Global         | 0.16           | 0.17           | -0.17          | 0.07           | 0.25           | 0.27           | 0.00           | 1.00   |

**Figure S1.** Pearson correlation ( $r$ ) matrix of chl-*a* retrieval algorithms performance results ( $r^2$ ) for each identified OWT using hierarchical clustering and for all lakes (“global”). The results indicate whether OWTs were found to have similar performances amongst the tested algorithms.

## References

- Alawadi, F. Detection of surface algal blooms using the newly developed algorithm surface algal bloom index (SABI). *Proceedings of the International Society for Optics and Photonics*, 2010. 7825:1–14
- Boucher, J., Weathers, K. C., Norouzi, H., & Steele, B. Assessing the effectiveness of Landsat 8 chlorophyll a retrieval algorithms for regional freshwater monitoring. *Ecol Appl*, 2018. 28(4)1044-1054.
- Chen, J., Zhang, X., & Quan, W. Retrieval chlorophyll-a concentration from coastal waters: three-band semi-analytical algorithms comparison and development. *Opt Express*, 2013. 21(7), 9024-9042
- Fadel, A., Faour, G., & Slim, K. Assessment of the trophic state and chlorophyll-a concentrations using Landsat OLI in Karaoun Reservoir, Lebanon. *Lebanese Science Journal*, 2016. 17, 130-145.
- Guan, X. *Monitoring Lake Simcoe water quality using Landsat TM images* (Master's thesis, University of Waterloo). 2009.
- Ho, J. C., Stumpf, R. P., Bridgeman, T. B., & Michalak, A. M. Using Landsat to extend the historical record of lacustrine phytoplankton blooms: A Lake Erie case study. *Remote Sens Environ*, 2017. 191, 273-285.
- Kabbara, N., Benkhelil, J., Awad, M., & Barale, V. Monitoring water quality in the coastal area of Tripoli (Lebanon) using high-resolution satellite data. *ISPRS J Photogramm*, 2008. 63(5), 488-495.
- Keith, D., Rover, J., Green, J., Zalewsky, B., Charpentier, M., Thursby, G., & Bishop, J. Monitoring algal blooms in drinking water reservoirs using the Landsat-8 Operational Land Imager. *Int J Remote Sens*, 2018. 39(9), 2818-2846.

- Mayo, M., Gitelson, A., Yacobi, Y. Z., & Ben-Avraham, Z. Chlorophyll distribution in Lake Kinneret determined from Landsat Thematic Mapper data. *Remote Sens-Basel*, 1995. 16(1), 175-182
- Patra, P. P., Dubey, S. K., Trivedi, R. K., Sahu, S. K., & Rout, S. K. Estimation of chlorophyll-a concentration and trophic states in Nalban lake of East Kolkata wetland, India from Landsat 8 OLI data. *Spatial Information Research*, 2017. 25(1), 75-87.
- Singh, K., Ghosh, M., Sharma, S. R., & Kumar, P. Blue–red–N model for chlorophyll-a retrieval in hypersaline–alkaline water using Landsat ETM+ sensor. *IEEE J Sel Top Appl*, 2014. 7(8), 3553-3559
- Trinh, R. C., Fichot, C. G., Gierach, M. M., Holt, B., Malakar, N. K., Hulley, G., & Smith, J. (). Application of Landsat 8 for monitoring impacts of wastewater discharge on coastal water quality. *Frontiers in Marine Science*, 2017. 4, 329.
- Tucker, C. J. Red and photographic infrared linear combinations for monitoring vegetation. *Remote Sens Environ*, 1979. 8(2), 127-150.
